# Supplementary material for: Iridium-catalyzed regioselective hydrosilylation of internal alkynes facilitated by directing and steric effects
Source: Royal Society of Chemistry journal article supplement (doi:10.1039/d1ob00910a), 2021-01-01
Supplement: d1ob00910a1.pdf [file d1ob00910a1.pdf]

Supporting Information

**Iridium-catalyzed regioselective hydrosilylation of internal alkynes facilitated by directing and steric effect**

Weiwei Gao,<sup>a</sup> Huan Ding,<sup>a</sup> Tian Yu,<sup>a</sup> Zhen Wang<sup>a</sup> and Shengtao Ding<sup>\*a</sup>

<sup>a</sup>*State Key Laboratory of Organic-Inorganic Composites, College of Chemical Engineering, Beijing University of Chemical Technology, Beijing, China.*

**Table of Contents**

|                                                                                |    |
|--------------------------------------------------------------------------------|----|
| I. General information .....                                                   | 2  |
| II. Iridium-catalyzed regioselective hydrosilylation of internal alkynes ..... | 3  |
| III. <sup>1</sup> H & <sup>13</sup> C NMR Spectrum .....                       | 16 |

## **I. General information**

All air or moisture sensitive reactions were conducted in oven-dried glassware under nitrogen atmosphere using dry solvents. Flash column chromatography was performed over silica gel (200-300 mesh) purchased from Qingdao Puke Co., China. Silanes and common organic chemicals were purchased from commercial suppliers, such as Sigma-Aldrich® and J&K® Scientific Ltd., and used as received. Iridium complexes were purchased from Strem® Chemicals, Inc. <sup>1</sup>H and <sup>13</sup>C NMR spectra were collected on a Bruker AV 400 MHz NMR spectrometer using residue solvent peaks as an internal standard (<sup>1</sup>H NMR: CDCl<sub>3</sub> at 7.26 ppm, <sup>13</sup>C NMR: CDCl<sub>3</sub> at 77.0 ppm). Mass spectra were collected on a Thermo Scientific GC/MS ISQ7000 system, or a Xevo G2 Qtof mass spectrometer.

## II. Iridium-catalyzed regioselective hydrosilylation of internal alkynes

### General Procedure.

In a glove box, to an oven-dried 5-mL vial were added the alkene (0.50 mmol), the silane (0.75 mmol), [Ir(COD)Cl]<sub>2</sub> (0.01 mmol, 2 mol %), and MeCN (1.0 mL). The vial was capped and removed from the glove box. The reaction mixture was stirred at room temperature for 9 h, and then concentrated under reduced pressure. The residue was purified by silica gel flash column chromatography (eluent: 0→20% EtOAc in petroleum ether) to give the desired product.

**Table S1.** Screening of hydrosilane.

| $n\text{-Bu}-\text{C}\equiv\text{C}-\text{CH}_2\text{OAc} + \text{Si-H} \xrightarrow[\text{MeCN, N}_2, \text{r.t.}]{[\text{Ir(COD)Cl}]_2} n\text{-Bu}-\text{CH}=\text{CH}-\text{CH}_2\text{OAc}$ |                         |          |                        |                             |
|--------------------------------------------------------------------------------------------------------------------------------------------------------------------------------------------------|-------------------------|----------|------------------------|-----------------------------|
| Entry                                                                                                                                                                                            | Si-H                    | Conv (%) | Yield (%) <sup>b</sup> | $\alpha/\beta$ <sup>c</sup> |
| 1                                                                                                                                                                                                | HSi(OEt) <sub>3</sub>   | 50       | 46                     | 91 : 9                      |
| 2                                                                                                                                                                                                | HSi(OMe) <sub>3</sub>   | 50       | 29                     | 89 : 11                     |
| 3                                                                                                                                                                                                | HSiMe(OEt) <sub>2</sub> | 50       | 23                     | 91 : 9                      |
| 4                                                                                                                                                                                                | HSiEt <sub>3</sub>      | 100      | 35                     | 87 : 13                     |
| 5                                                                                                                                                                                                | HSiPh <sub>3</sub>      | 99       | 35                     | 86 : 14                     |
| 6                                                                                                                                                                                                | HSiPh <sub>2</sub> Me   | 99       | 29                     | 91 : 9                      |
| 7                                                                                                                                                                                                | HSiPhMe <sub>2</sub>    | 99       | 30                     | 97 : 3                      |
| 8                                                                                                                                                                                                | HSiBnMe <sub>2</sub>    | 99       | 30                     | 93 : 7                      |

<sup>a</sup> Reaction conditions: internal alkyne (0.20 mmol, 1.0 eq.), hydrosilane (0.30 mmol, 1.5 eq.) and [Ir(COD)Cl]<sub>2</sub> (0.004 mmol, 2 mol%) in MeCN (0.40 mL, 0.5 M) under N<sub>2</sub> for 9 h at room temperature.

<sup>b</sup> <sup>1</sup>H NMR yield using dimethylsulfone as an internal standard.

<sup>c</sup>  $\alpha/\beta$  ratio of the crude product determined by <sup>1</sup>H NMR analysis.

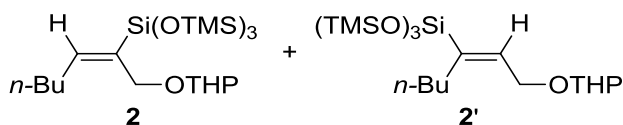

Compounds **2** and **2'** were prepared as a mixture according to the General Procedure in a total yield of 84% (207.0 mg) with an  $\alpha/\beta$  ratio of 83:17.

**(E)-1,1,1,5,5,5-hexamethyl-3-(1-((tetrahydro-2H-pyran-2-yl)oxy)hept-2-en-2-yl)-3-((trimethylsilyl)oxy)trisiloxane (2).**

<sup>1</sup>H NMR (400 MHz, CDCl<sub>3</sub>)  $\delta$  6.12 (t, *J* = 7.2 Hz, 1 H), 4.60 (t, *J* = 3.2 Hz, 1 H), 4.31 (d, *J* = 12.0 Hz, 1 H), 4.01 (d, *J* = 11.6 Hz, 1 H), 3.92-3.85 (m, 1 H), 3.53-3.46 (m, 1 H), 2.18 (q, *J* = 7.2 Hz, 2 H), 1.69-1.46 (m, 6 H), 1.39-1.29 (m, 4 H), 0.90 (t, *J* = 7.2 Hz, 3 H), 0.10 (s, 27 H).

<sup>13</sup>C NMR (100 MHz, CDCl<sub>3</sub>)  $\delta$  147.3, 132.9, 97.8, 63.9, 61.8, 31.5, 30.6, 28.6, 25.6, 22.4, 19.4, 13.9, 1.8.

HRMS *m/z* (CI) calcd. for C<sub>21</sub>H<sub>49</sub>O<sub>5</sub>Si<sub>4</sub> (M+H)<sup>+</sup> 493.2658, found 493.2643.

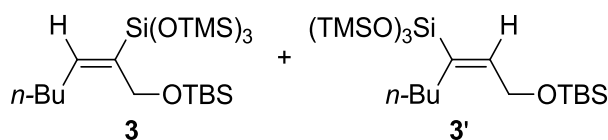

Compounds **3** and **3'** were prepared as a mixture according to the General Procedure in a total yield of 96% (251.1 mg) with an  $\alpha/\beta$  ratio of 81:19.

**(E)-3-(1-((tert-butyldimethylsilyl)oxy)hept-2-en-2-yl)-1,1,1,5,5,5-hexamethyl-3-((trimethylsilyl)oxy)trisiloxane (3).**

**<sup>1</sup>H NMR** (400 MHz, CDCl<sub>3</sub>)  $\delta$  6.03 (t,  $J$  = 7.2 Hz, 1 H), 4.20 (s, 2 H), 2.20 (q,  $J$  = 7.2 Hz, 2 H), 1.39-1.28 (m, 4 H), 0.90 (s, 12 H), 0.10 (s, 27 H), 0.06 (d,  $J$  = 0.4 Hz, 6 H).

**<sup>13</sup>C NMR** (100 MHz, CDCl<sub>3</sub>)  $\delta$  146.4, 135.2, 60.1, 31.5, 28.9, 26.1, 25.9, 22.5, 14.0, 1.8, -5.3.

**HRMS**  $m/z$  (CI) calcd. for C<sub>22</sub>H<sub>55</sub>O<sub>4</sub>Si<sub>5</sub> (M+H)<sup>+</sup> 523.2947, found 523.2968.

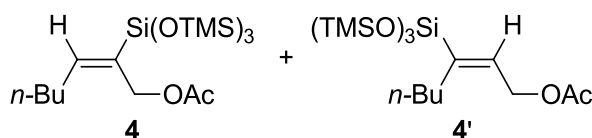

Compounds **4** and **4'** were prepared as a mixture according to the General Procedure in a total yield of 95% (214.2 mg) with an  $\alpha/\beta$  ratio of 90:10.

**(E)-2-(1,1,1,5,5,5-hexamethyl-3-((trimethylsilyl)oxy)trisiloxan-3-yl)hept-2-en-1-yl acetate (4).**

**<sup>1</sup>H NMR** (400 MHz, CDCl<sub>3</sub>)  $\delta$  6.15 (t,  $J$  = 7.2 Hz, 1 H), 4.66 (s, 2 H), 2.14 (q,  $J$  = 6.8 Hz, 2 H), 2.04 (d,  $J$  = 0.8 Hz, 3 H), 1.38-1.31 (m, 4 H), 0.90 (t,  $J$  = 7.2 Hz, 3 H), 0.10 (s, 27 H).

**<sup>13</sup>C NMR** (100 MHz, CDCl<sub>3</sub>)  $\delta$  171.1, 148.2, 130.8, 61.9, 31.2, 28.5, 22.3, 21.2, 13.9, 1.7.

**HRMS**  $m/z$  (CI) calcd. for C<sub>18</sub>H<sub>43</sub>O<sub>5</sub>Si<sub>4</sub> (M+H)<sup>+</sup> 450.2188, found 450.2164.

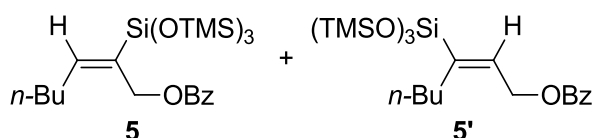

Compounds **5** and **5'** were prepared as a mixture according to the General Procedure in a total yield of 90% (230.8 mg) with an  $\alpha/\beta$  ratio of 91:9.

**(E)-2-(1,1,1,5,5,5-hexamethyl-3-((trimethylsilyl)oxy)trisiloxan-3-yl)hept-2-en-1-yl benzoate (5).**

**<sup>1</sup>H NMR** (400 MHz, CDCl<sub>3</sub>)  $\delta$  8.08 (dd,  $J$  = 1.2, 8.4 Hz, 2 H), 7.54 (t,  $J$  = 7.6 Hz, 1 H), 7.42 (t,  $J$  = 8.0 Hz, 2 H), 6.21 (t,  $J$  = 7.2 Hz, 1 H), 4.92 (s, 2 H), 2.21 (q,  $J$  = 6.8 Hz, 2 H), 1.43-1.32 (m, 4 H), 0.90 (t,  $J$  = 7.2 Hz, 3 H), 0.09 (s, 27 H).

**<sup>13</sup>C NMR** (100 MHz, CDCl<sub>3</sub>)  $\delta$  166.7, 148.1, 132.7, 131.0, 130.5, 129.8, 128.2, 62.6, 31.3, 28.7, 22.4, 13.9, 1.8.

**HRMS**  $m/z$  (CI) calcd. for C<sub>23</sub>H<sub>45</sub>O<sub>5</sub>Si<sub>4</sub> (M+H)<sup>+</sup> 513.2345, found 513.2356.

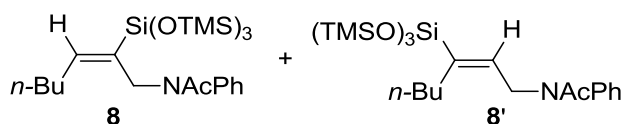

Compounds **8** and **8'** were prepared as a mixture according to the General Procedure in a total yield of 63% (165.7 mg) with an  $\alpha/\beta$  ratio of 85:15.

**(E)-N-(2-(1,1,1,5,5,5-hexamethyl-3-((trimethylsilyl)oxy)trisiloxan-3-yl)hept-2-en-1-yl)-N-phenylacetamide (8).**

**<sup>1</sup>H NMR** (400 MHz, CDCl<sub>3</sub>)  $\delta$  7.37-7.26 (m, 3 H), 7.15 (d,  $J$  = 6.4 Hz, 2 H), 5.97 (t,  $J$  = 7.2 Hz, 1 H), 4.49 (s, 2 H), 1.76 (s, 3 H), 1.65 (q,  $J$  = 7.2 Hz, 2 H), 1.14-1.06 (m, 2 H), 1.00-0.92 (m, 2 H), 0.77 (t,  $J$  = 7.2 Hz, 3 H), 0.10 (s, 27 H).

**<sup>13</sup>C NMR** (100 MHz, CDCl<sub>3</sub>)  $\delta$  169.5, 148.9, 142.3, 130.5, 129.2, 128.9, 127.5, 44.2, 30.8, 27.8, 23.0, 22.2, 13.8, 1.7.

**HRMS**  $m/z$  (CI) calcd. for C<sub>24</sub>H<sub>48</sub>NO<sub>4</sub>Si<sub>4</sub> (M+H)<sup>+</sup> 526.2661, found 526.2650.

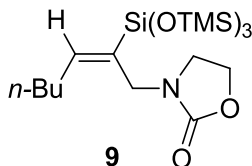

**(E)-2-(2-(1,1,1,5,5,5-hexamethyl-3-((trimethylsilyl)oxy)trisiloxan-3-yl)hept-2-en-1-yl)isoxazolidin-3-one (9)** was prepared as colorless oil according to the General Procedure in a yield of 73% (174.4 mg).

**<sup>1</sup>H NMR** (400 MHz, CDCl<sub>3</sub>)  $\delta$  6.20 (t,  $J$  = 7.2 Hz, 1 H), 4.24 (t,  $J$  = 8.0 Hz, 2 H), 3.94 (s, 2 H), 3.41 (t,  $J$  = 8.4 Hz, 2 H), 2.17 (q,  $J$  = 6.8 Hz, 2 H), 1.38-1.26 (m, 4 H), 0.90 (t,  $J$  = 6.8 Hz, 3 H), 0.12 (s, 27 H).

**<sup>13</sup>C NMR** (100 MHz, CDCl<sub>3</sub>)  $\delta$  157.9, 149.2, 130.4, 61.7, 43.9, 31.2, 28.3, 22.3, 13.9, 1.7.

**HRMS**  $m/z$  (CI) calcd. for C<sub>19</sub>H<sub>44</sub>NO<sub>5</sub>Si<sub>4</sub> (M+H)<sup>+</sup> 478.2297, found 478.2283.

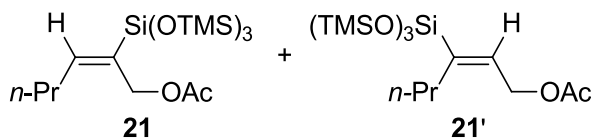

Compounds **21** and **21'** were prepared as a mixture according to the General Procedure in a total yield of 92% (200.9 mg) with an  $\alpha/\beta$  ratio of 90:10.

**(E)-2-(1,1,1,5,5,5-hexamethyl-3-((trimethylsilyl)oxy)trisiloxan-3-yl)hex-2-en-1-yl acetate (21).**

**<sup>1</sup>H NMR** (400 MHz, CDCl<sub>3</sub>)  $\delta$  6.15 (t,  $J$  = 7.2 Hz, 1 H), 4.7 (s, 2 H), 2.13 (q,  $J$  = 7.2 Hz, 2 H), 2.0 (s, 3 H), 1.42 (q,  $J$  = 7.2 Hz, 2 H), 0.91 (t,  $J$  = 7.2 Hz, 3 H), 0.10 (s, 27 H).

**<sup>13</sup>C NMR** (100 MHz, CDCl<sub>3</sub>)  $\delta$  171.1, 148.0, 131.0, 61.9, 30.8, 22.3, 21.2, 13.7, 1.7.

**HRMS**  $m/z$  (CI) calcd. for C<sub>17</sub>H<sub>41</sub>O<sub>5</sub>Si<sub>4</sub> (M+H)<sup>+</sup> 437.2032, found 437.2045.

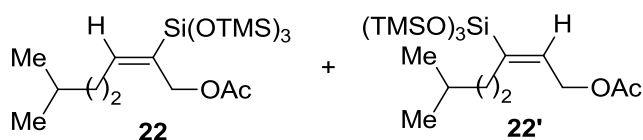

Compounds **22** and **22'** were prepared as a mixture according to the General Procedure in a total yield of 92% (213.9 mg) with an  $\alpha/\beta$  ratio of 89:11.

**(E)-2-(1,1,1,5,5,5-hexamethyl-3-((trimethylsilyl)oxy)trisiloxan-3-yl)-6-methylhept-2-en-1-yl acetate (22).**

<sup>1</sup>H NMR (400 MHz, CDCl<sub>3</sub>)  $\delta$  6.14 (t,  $J$  = 7.2 Hz, 1 H), 4.66 (s, 2 H), 2.14 (q,  $J$  = 7.2 Hz, 2 H), 2.04 (s, 3 H), 1.61-1.51 (m, 1 H), 1.27 (q,  $J$  = 6.8 Hz, 2 H), 0.90 (s, 3 H), 0.88 (s, 3 H), 0.11 (s, 27 H).

<sup>13</sup>C NMR (100 MHz, CDCl<sub>3</sub>)  $\delta$  171.0, 148.4, 130.6, 61.9, 38.2, 27.7, 26.8, 22.4, 21.1, 1.7.

HRMS  $m/z$  (CI) calcd. for C<sub>19</sub>H<sub>45</sub>O<sub>5</sub>Si<sub>4</sub> (M+H)<sup>+</sup> 465.2345, found 465.2338.

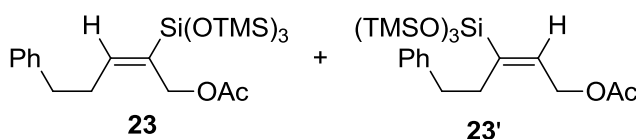

Compounds **23** and **23'** were prepared as a mixture according to the General Procedure in a total yield of 91% (227.0 mg) with an  $\alpha/\beta$  ratio of 88:12.

**(E)-2-(1,1,1,5,5,5-hexamethyl-3-((trimethylsilyl)oxy)trisiloxan-3-yl)-5-phenylpent-2-en-1-yl acetate (23).**

<sup>1</sup>H NMR (400 MHz, CDCl<sub>3</sub>)  $\delta$  7.32-7.26 (m, 5 H), 6.20 (t,  $J$  = 7.2 Hz, 1 H), 4.64 (s, 2 H), 2.73 (t,  $J$  = 7.6 Hz, 2 H), 2.51 (t,  $J$  = 7.6 Hz, 2 H), 2.05 (s, 3 H), 0.12 (s, 27 H).

<sup>13</sup>C NMR (100 MHz, CDCl<sub>3</sub>)  $\delta$  170.9, 146.6, 141.3, 131.7, 128.4, 128.4, 125.9, 61.8, 35.2, 30.5, 21.1, 1.7.

HRMS  $m/z$  (CI) calcd. for C<sub>22</sub>H<sub>43</sub>O<sub>5</sub>Si<sub>4</sub> (M+H)<sup>+</sup> 498.2188, found 498.2176.

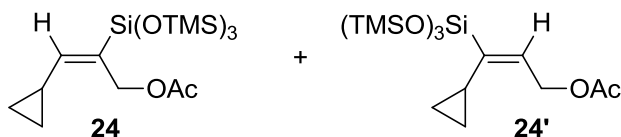

Compounds **24** and **24'** were prepared as a mixture according to the General Procedure in a total yield of 99% (215.2 mg) with an  $\alpha/\beta$  ratio of 75:25.

**(E)-3-cyclopropyl-2-(1,1,1,5,5,5-hexamethyl-3-((trimethylsilyl)oxy)trisiloxan-3-yl)allyl acetate (24).**

<sup>1</sup>H NMR (400 MHz, CDCl<sub>3</sub>)  $\delta$  5.40 (d,  $J$  = 10.0 Hz, 1 H), 4.79 (d,  $J$  = 0.8 Hz, 2 H), 2.06 (s, 3 H), 1.26 (t,  $J$  = 6.8 Hz, 1 H), 0.87-0.81 (m, 2 H), 0.46-0.41 (m, 2 H), 0.10 (s, 27 H).

<sup>13</sup>C NMR (100 MHz, CDCl<sub>3</sub>)  $\delta$  171.2, 152.5, 128.1, 62.3, 21.2, 11.2, 7.7, 1.7.

HRMS  $m/z$  (CI) calcd. for C<sub>17</sub>H<sub>39</sub>O<sub>5</sub>Si<sub>4</sub> (M+H)<sup>+</sup> 435.1875, found 435.1879.

**(E)-3-cyclopropyl-3-(1,1,1,5,5,5-hexamethyl-3-((trimethylsilyl)oxy)trisiloxan-3-yl)allyl acetate (24').**

<sup>1</sup>H NMR (400 MHz, CDCl<sub>3</sub>)  $\delta$  6.03 (td,  $J$  = 1.2, 5.6 Hz, 1 H), 4.83 (d,  $J$  = 5.6 Hz, 2 H), 2.08 (s, 3 H), 1.43-1.35 (m, 1 H), 0.70-0.64 (m, 2 H), 0.62-0.57 (m, 2 H), 0.11 (s, 27 H).

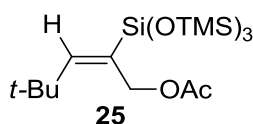

**(E)-2-(1,1,1,5,5,5-hexamethyl-3-((trimethylsilyl)oxy)trisiloxan-3-yl)-4,4-dimethylpent-2-en-1-yl acetate (25)** was prepared as colorless oil according to the General Procedure in a yield of 89% (200.6 mg). <sup>1</sup>H NMR (400 MHz, CDCl<sub>3</sub>) δ 6.12 (t, *J* = 1.6 Hz, 1 H), 4.80 (d, *J* = 1.2 Hz, 2 H), 2.04 (s, 3 H), 1.13 (s, 9 H), 0.10 (s, 27 H). <sup>13</sup>C NMR (100 MHz, CDCl<sub>3</sub>) δ 170.9, 156.3, 129.7, 61.8, 34.8, 30.7, 21.3, 1.7. HRMS *m/z* (CI) calcd. for C<sub>18</sub>H<sub>43</sub>O<sub>5</sub>Si<sub>4</sub> (M+H)<sup>+</sup> 450.2188, found 450.2197.

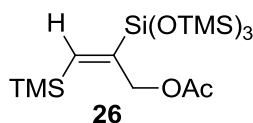

**(E)-2-(1,1,1,5,5,5-hexamethyl-3-((trimethylsilyl)oxy)trisiloxan-3-yl)-3-(trimethylsilyl)allyl acetate (26)** was prepared as colorless oil according to the General Procedure in a yield of 85% yield (198.5 mg). <sup>1</sup>H NMR (400 MHz, CDCl<sub>3</sub>) δ 6.49 (s, 1 H), 4.69 (s, 2 H), 2.06 (s, 3 H), 0.14 (s, 9 H), 0.10 (s, 27 H). <sup>13</sup>C NMR (100 MHz, CDCl<sub>3</sub>) δ 170.8, 152.4, 149.6, 66.4, 21.2, 1.70, -0.13. HRMS *m/z* (CI) calcd. for C<sub>17</sub>H<sub>43</sub>O<sub>5</sub>Si<sub>5</sub> (M+H)<sup>+</sup> 467.1958, found 467.1942.

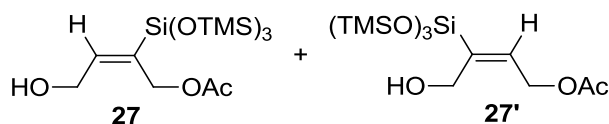

Compounds **27** and **27'** were prepared as a mixture according to the General Procedure in a total yield of 90% (191.2 mg) with an α/β ratio of 67:33.

**(E)-2-(1,1,1,5,5,5-hexamethyl-3-((trimethylsilyl)oxy)trisiloxan-3-yl)-4-hydroxybut-2-en-1-yl acetate (27)**. <sup>1</sup>H NMR (400 MHz, CDCl<sub>3</sub>) δ 6.27 (tt, *J* = 1.2, 6.0 Hz, 1 H), 4.67 (s, 2 H), 4.26 (d, *J* = 4.4 Hz, 2 H), 2.03 (d, *J* = 1.6 Hz, 3 H), 0.10 (d, *J* = 1.6 Hz, 27 H). <sup>13</sup>C NMR (100 MHz, CDCl<sub>3</sub>) δ 171.0, 145.2, 133.1, 61.8, 59.5, 21.1, 1.7. HRMS *m/z* (CI) calcd. for C<sub>15</sub>H<sub>37</sub>O<sub>6</sub>Si<sub>4</sub> (M+H)<sup>+</sup> 425.1688, found 425.1673.

**(E)-3-(1,1,1,5,5,5-hexamethyl-3-((trimethylsilyl)oxy)trisiloxan-3-yl)-4-hydroxybut-2-en-1-yl acetate (27')**. <sup>1</sup>H NMR (400 MHz, CDCl<sub>3</sub>) δ 6.00 (t, *J* = 6.0 Hz, 1 H), 4.72 (d, *J* = 6.4 Hz, 2 H), 4.29 (s, 2 H), 2.05 (d, *J* = 1.2 Hz, 3 H), 0.11 (d, *J* = 0.8 Hz, 27 H).

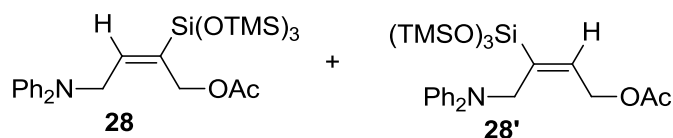

Compounds **28** and **28'** were prepared as a mixture according to the General Procedure in a total yield of 92% (265.0 mg) with an  $\alpha/\beta$  ratio of 50:50.

**(E)-4-(diphenylamino)-2-(1,1,1,5,5,5-hexamethyl-3-((trimethylsilyl)oxy)trisiloxan-3-yl)but-2-en-1-yl acetate (28).**

**(E)-4-(diphenylamino)-3-(1,1,1,5,5,5-hexamethyl-3-((trimethylsilyl)oxy)trisiloxan-3-yl)but-2-en-1-yl acetate (28').**

**<sup>1</sup>H NMR** (400 MHz, CDCl<sub>3</sub>)  $\delta$  7.30-7.20 (m, 8 H), 7.10-6.90 (m, 12 H), 6.31 (tt,  $J$  = 1.2, 5.6 Hz, 1 H), 5.96 (tt,  $J$  = 1.6, 5.6 Hz, 1 H), 4.71 (s, 2 H), 4.67 (d,  $J$  = 5.6 Hz, 2 H), 4.51 (d,  $J$  = 5.6 Hz, 2 H), 4.41 (d,  $J$  = 1.6 Hz, 2 H), 2.09 (s, 3 H), 2.01 (s, 3 H), 0.13 (s, 27 H), 0.08 (s, 27 H).

**<sup>13</sup>C NMR** (100 MHz, CDCl<sub>3</sub>)  $\delta$  170.8, 170.7, 148.4, 147.8, 144.7, 137.7, 136.5, 133.2, 129.2, 129.0, 121.6, 121.4, 121.3, 121.0, 62.7, 61.7, 53.1, 51.0, 21.1, 20.8, 1.7, 1.6.

**HRMS**  $m/z$  (CI) calcd. for C<sub>27</sub>H<sub>46</sub>NO<sub>5</sub>Si<sub>4</sub> (M+H)<sup>+</sup> 575.2375, found 575.2369.

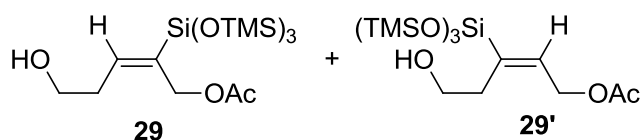

Compounds **29** and **29'** were prepared as a mixture according to the General Procedure in a total yield of 86% (189.6 mg) with an  $\alpha/\beta$  ratio of 86:14.

**(E)-2-(1,1,1,5,5,5-hexamethyl-3-((trimethylsilyl)oxy)trisiloxan-3-yl)-5-hydroxypent-2-en-1-yl acetate (29).**

**<sup>1</sup>H NMR** (400 MHz, CDCl<sub>3</sub>)  $\delta$  6.17 (t,  $J$  = 7.2 Hz, 1 H), 4.69 (s, 2 H), 3.69 (t,  $J$  = 6.4 Hz, 2 H), 2.45 (q,  $J$  = 6.8 Hz, 2 H), 2.04 (s, 3 H), 0.11 (s, 27 H).

**<sup>13</sup>C NMR** (100 MHz, CDCl<sub>3</sub>)  $\delta$  171.0, 143.4, 134.3, 61.8, 61.7, 32.4, 21.2, 1.7.

**HRMS**  $m/z$  (CI) calcd. for C<sub>16</sub>H<sub>39</sub>O<sub>6</sub>Si<sub>4</sub> (M+H)<sup>+</sup> 439.1824, found 439.1810.

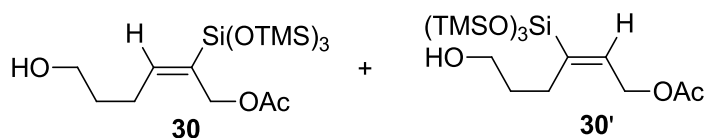

Compounds **30** and **30'** were prepared as a mixture according to the General Procedure in a total yield of 90% (203.8 mg) with an  $\alpha/\beta$  ratio of 88:12.

**(E)-2-(1,1,1,5,5,5-hexamethyl-3-((trimethylsilyl)oxy)trisiloxan-3-yl)-6-hydroxyhex-2-en-1-yl acetate (30).**

**<sup>1</sup>H NMR** (400 MHz, CDCl<sub>3</sub>)  $\delta$  6.12 (t,  $J$  = 7.2 Hz, 1 H), 4.68 (s, 2 H), 3.63 (t,  $J$  = 6.0 Hz, 2 H), 2.27 (q,  $J$  = 7.2 Hz, 2 H), 2.03 (s, 3 H), 1.71-1.63 (m, 2 H), 0.1 (s, 27 H).

**<sup>13</sup>C NMR** (100 MHz, CDCl<sub>3</sub>)  $\delta$  171.1, 147.0, 131.9, 61.9, 61.8, 31.9, 25.0, 21.2, 1.7.

**HRMS**  $m/z$  (CI) calcd. for C<sub>17</sub>H<sub>41</sub>O<sub>6</sub>Si<sub>4</sub> (M+H)<sup>+</sup> 453.1981, found 453.1995.



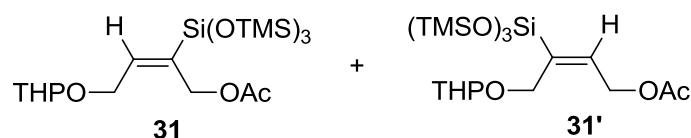

Compounds **31** and **31'** were prepared as a mixture according to the General Procedure in a total yield of 93% (236.6 mg) with an  $\alpha/\beta$  ratio of 75:25.

**(E)-2-(1,1,1,5,5,5-hexamethyl-3-((trimethylsilyl)oxy)trisiloxan-3-yl)-4-((tetrahydro-2H-pyran-2-yl)oxy)but-2-en-1-yl acetate (31).**

<sup>1</sup>H NMR (400 MHz, CDCl<sub>3</sub>)  $\delta$  6.24 (t,  $J$  = 4.8 Hz, 1 H), 4.65 (d,  $J$  = 3.2 Hz, 2 H), 4.61 (d,  $J$  = 3.6 Hz, 1 H), 3.88-3.81 (m, 2 H), 3.53-3.345 (m, 2 H), 2.03 (s, 3 H), 1.62-1.52 (m, 6 H), 0.10 (s, 27 H).

<sup>13</sup>C NMR (100 MHz, CDCl<sub>3</sub>)  $\delta$  170.8, 143.5, 133.3, 98.0, 64.4, 63.8, 62.2, 30.6, 25.4, 21.1, 19.4, 1.7.

HRMS  $m/z$  (CI) calcd. for C<sub>20</sub>H<sub>45</sub>O<sub>7</sub>Si<sub>4</sub> (M+H)<sup>+</sup> 508.2164, found 508.2152.

**(E)-3-(1,1,1,5,5,5-hexamethyl-3-((trimethylsilyl)oxy)trisiloxan-3-yl)-4-((tetrahydro-2H-pyran-2-yl)oxy)but-2-en-1-yl acetate (31').**

<sup>1</sup>H NMR (400 MHz, CDCl<sub>3</sub>)  $\delta$  6.07 (t,  $J$  = 5.6 Hz, 1 H), 4.81-4.78 (m, 2 H), 4.59 (d,  $J$  = 5.6 Hz, 1 H), 3.88-3.81 (m, 2 H), 3.53-3.345 (m, 2 H), 2.05 (s, 3 H), 1.62-1.52 (m, 6 H), 0.10 (s, 27 H).

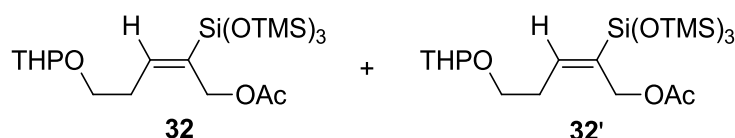

Compounds **32** and **32'** were prepared as a mixture according to the General Procedure in a total yield of 99% (258.8 mg) with an  $\alpha/\beta$  ratio of 88:12.

**(E)-2-(1,1,1,5,5,5-hexamethyl-3-((trimethylsilyl)oxy)trisiloxan-3-yl)-5-((tetrahydro-2H-pyran-2-yl)oxy)pent-2-en-1-yl acetate (32).**

<sup>1</sup>H NMR (400 MHz, CDCl<sub>3</sub>)  $\delta$  6.22 (t,  $J$  = 7.2 Hz, 1 H), 4.68 (s, 2 H), 4.60 (t,  $J$  = 3.6 Hz, 1 H), 3.88-3.75 (m, 2 H), 3.53-3.38 (m, 2 H), 2.46 (q,  $J$  = 6.8 Hz, 2 H), 2.04 (s, 3 H), 1.72-1.47 (m, 6 H), 0.10 (s, 27 H).

<sup>13</sup>C NMR (100 MHz, CDCl<sub>3</sub>)  $\delta$  171.0, 143.9, 132.9, 98.6, 66.3, 62.0, 30.6, 29.5, 25.5, 21.1, 19.3, 1.7.

HRMS  $m/z$  (CI) calcd. for C<sub>21</sub>H<sub>47</sub>O<sub>7</sub>Si<sub>4</sub> (M+H)<sup>+</sup> 522.2321, found 522.2337.

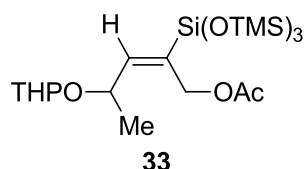

**(E)-2-(1,1,1,5,5,5-hexamethyl-3-((trimethylsilyl)oxy)trisiloxan-3-yl)-4-((tetrahydro-2H-pyran-2-yl)oxy)pent-2-en-1-yl acetate (33)** was prepared as colorless oil according to the General Procedure in a yield of 85% (222.2 mg).

<sup>1</sup>H NMR (400 MHz, CDCl<sub>3</sub>)  $\delta$  5.94 (d,  $J$  = 8.8 Hz, 1 H), 4.75-4.62 (m, 3 H), 4.50-4.47 (m, 1 H), 3.92-3.85 (m, 1 H), 3.49-3.43 (m, 1 H), 2.04 (s, 3 H), 1.86-1.50 (m, 6 H), 1.26 (d,  $J$  = 6.4 Hz, 3 H), 0.11 (s, 27 H).

$^{13}\text{C}$  NMR (100 MHz,  $\text{CDCl}_3$ )  $\delta$  170.7, 148.1, 133.8, 96.1, 66.9, 62.9, 61.8, 30.9, 25.5, 21.1, 20.9, 20.0, 1.7.

HRMS  $m/z$  (CI) calcd. for  $\text{C}_{21}\text{H}_{47}\text{O}_7\text{Si}_4$  ( $\text{M}+\text{H}$ ) $^+$  523.2400, found 523.2408.

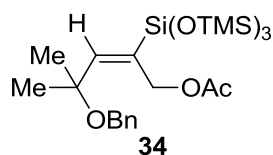

(*E*)-4-(benzyloxy)-2-(1,1,1,5,5,5-hexamethyl-3-((trimethylsilyl)oxy)trisiloxan-3-yl)-4-methylpent-2-en-1-yl acetate (**34**) was prepared as colorless oil according to the General Procedure in a yield of 92% (249.8 mg).

$^1\text{H}$  NMR (400 MHz,  $\text{CDCl}_3$ )  $\delta$  7.32 (d,  $J$  = 4.4 Hz, 4 H), 7.25-7.21 (m, 1 H), 6.08 (s, 1 H), 4.97 (d,  $J$  = 1.2 Hz, 2 H), 4.42 (s, 2 H), 1.91 (s, 3 H), 1.44 (s, 6 H), 0.12 (s, 27 H).

$^{13}\text{C}$  NMR (100 MHz,  $\text{CDCl}_3$ )  $\delta$  170.7, 148.9, 139.3, 134.7, 128.2, 127.1, 127.0, 76.6, 64.9, 62.2, 27.9, 21.1, 1.8.

HRMS  $m/z$  (CI) calcd. for  $\text{C}_{24}\text{H}_{47}\text{O}_6\text{Si}_4$  ( $\text{M}+\text{H}$ ) $^+$  543.2450, found 543.2463.

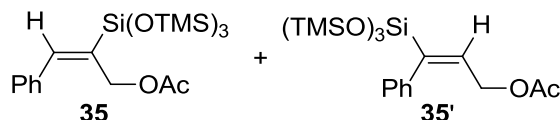

Compounds **35** and **35'** were prepared as a mixture according to the General Procedure in a total yield of 90% (211.9 mg) with an  $\alpha/\beta$  ratio of 89:11.

(*E*)-2-(1,1,1,5,5,5-hexamethyl-3-((trimethylsilyl)oxy)trisiloxan-3-yl)-3-phenylallyl acetate (**35**).

$^1\text{H}$  NMR (400 MHz,  $\text{CDCl}_3$ )  $\delta$  7.38-7.33 (m, 3 H), 7.30-7.27 (m, 2 H), 7.14 (s, 1 H), 7.30 (d,  $J$  = 1.6 Hz, 2 H), 2.06 (s, 3 H), 0.15 (s, 27 H).

$^{13}\text{C}$  NMR (100 MHz,  $\text{CDCl}_3$ )  $\delta$  170.8, 144.1, 136.9, 133.7, 128.7, 128.3, 127.6, 63.1, 21.2, 1.8.

HRMS  $m/z$  (CI) calcd. for  $\text{C}_{20}\text{H}_{39}\text{O}_5\text{Si}_4$  ( $\text{M}+\text{H}$ ) $^+$  470.1875, found 470.1893.

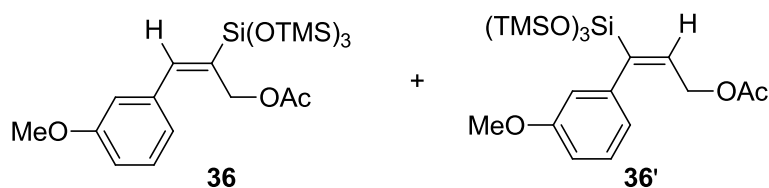

Compounds **36** and **36'** were prepared as a mixture according to the General Procedure in a total yield of 83% (207.9 mg) with an  $\alpha/\beta$  ratio of 86:14.

(*E*)-2-(1,1,1,5,5,5-hexamethyl-3-((trimethylsilyl)oxy)trisiloxan-3-yl)-3-(3-methoxyphenyl)allyl acetate (**36**).

$^1\text{H}$  NMR (400 MHz,  $\text{CDCl}_3$ )  $\delta$  7.27 (t,  $J$  = 8.0 Hz, 1 H), 7.12 (s, 1 H), 6.85-6.79 (m, 2 H), 6.78 (t,  $J$  = 2.0 Hz, 1 H), 4.83 (d,  $J$  = 1.2 Hz, 2 H), 3.81 (s, 3 H), 2.06 (s, 3 H), 0.15 (s, 27 H).

$^{13}\text{C}$  NMR (100 MHz,  $\text{CDCl}_3$ )  $\delta$  170.8, 159.4, 144.1, 138.3, 133.9, 129.3, 121.2, 114.2, 113.2, 63.1, 55.2, 21.2, 1.8.

**HRMS**  $m/z$  (CI) calcd. for  $C_{21}H_{41}O_6Si_4$  ( $M+H$ )<sup>+</sup> 501.1981, found 501.1975.

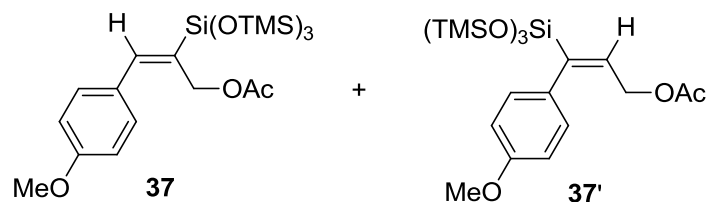

Compounds **37** and **37'** were prepared as a mixture according to the General Procedure in a total yield of 77% (192.8 mg) with an  $\alpha/\beta$  ratio of 81:19.

**(E)-2-(1,1,1,5,5,5-hexamethyl-3-((trimethylsilyl)oxy)trisiloxan-3-yl)-3-(4-methoxyphenyl)allyl acetate (37).**

**<sup>1</sup>H NMR** (400 MHz,  $CDCl_3$ )  $\delta$  7.19 (s, 1 H), 7.17 (s, 1 H), 7.08 (s, 1 H), 6.90 (s, 1 H), 6.87 (s, 1 H), 4.84 (s, 2 H), 3.82 (s, 3 H), 2.07 (s, 3 H), 0.15 (s, 27 H).

**<sup>13</sup>C NMR** (100 MHz,  $CDCl_3$ )  $\delta$  170.9, 159.2, 143.8, 130.3, 129.5, 129.3, 113.7, 63.2, 55.3, 21.2, 1.8.

**HRMS**  $m/z$  (CI) calcd. for  $C_{21}H_{41}O_6Si_4$  ( $M+H$ )<sup>+</sup> 501.1981, found 501.2001.

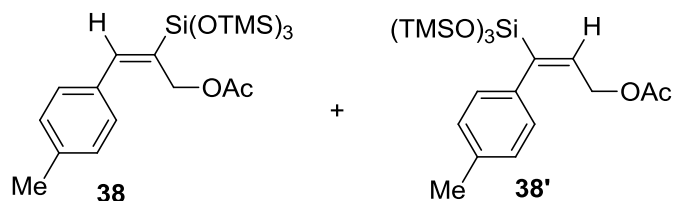

Compounds **38** and **38'** were prepared as a mixture according to the General Procedure in a total yield of 90% (218.2 mg) with an  $\alpha/\beta$  ratio of 86:14.

**(E)-2-(1,1,1,5,5,5-hexamethyl-3-((trimethylsilyl)oxy)trisiloxan-3-yl)-3-(p-tolyl)allyl acetate (38).**

**<sup>1</sup>H NMR** (400 MHz,  $CDCl_3$ )  $\delta$  7.18-7.07 (m, 5 H), 4.84 (s, 2 H), 2.35 (s, 3 H), 2.06 (s, 3 H), 0.15 (s, 27 H).

**<sup>13</sup>C NMR** (100 MHz,  $CDCl_3$ )  $\delta$  170.8, 144.1, 137.6, 134.0, 132.8, 129.0, 128.8, 63.2, 21.2, 1.8.

**HRMS**  $m/z$  (CI) calcd. for  $C_{21}H_{41}O_5Si_4$  ( $M+H$ )<sup>+</sup> 485.1672, found 485.1664.

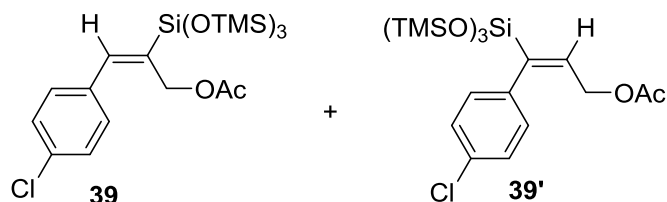

Compounds **39** and **39'** were prepared as a mixture according to the General Procedure in a total yield of 75% (189.5 mg) with an  $\alpha/\beta$  ratio of 88:12.

**(E)-3-(4-chlorophenyl)-2-(1,1,1,5,5,5-hexamethyl-3-((trimethylsilyl)oxy)trisiloxan-3-yl)allyl acetate (39).**

**<sup>1</sup>H NMR** (400 MHz,  $CDCl_3$ )  $\delta$  7.32 (d,  $J$  = 8.4 Hz, 2 H), 7.16 (d,  $J$  = 8.4 Hz, 2 H), 7.07 (s, 1 H), 4.80 (s, 2 H), 2.06 (s, 3 H), 0.15 (s, 27 H).

$^{13}\text{C}$  NMR (100 MHz,  $\text{CDCl}_3$ )  $\delta$  170.7, 142.6, 135.3, 134.7, 133.6, 130.0, 128.5, 62.8, 21.1, 1.8.

HRMS  $m/z$  (CI) calcd. for  $\text{C}_{20}\text{H}_{38}\text{ClO}_5\text{Si}_4$  ( $\text{M}+\text{H}$ ) $^+$  505.1486, found 505.1501.

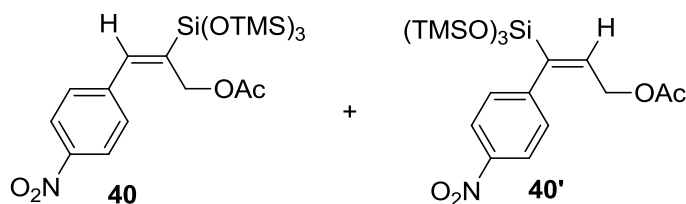

Compounds **40** and **40'** were prepared as a mixture according to the General Procedure in a total yield of 58% (149.6 mg) with an  $\alpha/\beta$  ratio of 95:5.

**(E)-2-(1,1,1,5,5,5-hexamethyl-3-((trimethylsilyl)oxy)trisiloxan-3-yl)-3-(4-nitrophenyl)allyl acetate (40).**

$^1\text{H}$  NMR (400 MHz,  $\text{CDCl}_3$ )  $\delta$  8.21 (d,  $J$  = 8.8 Hz, 2 H), 7.37 (d,  $J$  = 8.8 Hz, 2 H), 7.12 (s, 1 H), 4.78 (d,  $J$  = 1.2 Hz, 2 H), 2.04 (s, 3 H), 0.16 (s, 27 H).

$^{13}\text{C}$  NMR (100 MHz,  $\text{CDCl}_3$ )  $\delta$  170.5, 166.2, 142.8, 141.3, 136.0, 129.5, 128.5, 62.8, 60.9, 21.1, 14.3, 1.7.

HRMS  $m/z$  (CI) calcd. for  $\text{C}_{20}\text{H}_{38}\text{NO}_7\text{Si}_4$  ( $\text{M}+\text{H}$ ) $^+$  516.1726, found 516.1720.

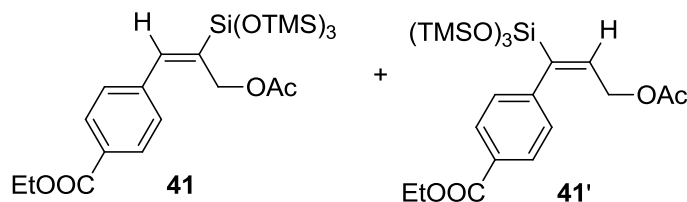

Compounds **41** and **41'** were prepared as a mixture according to the General Procedure in a total yield of 60% (162.9 mg) with an  $\alpha/\beta$  ratio of 91:9.

**Ethyl(E)-4-(3-acetoxy-2-(1,1,1,5,5,5-hexamethyl-3-((trimethylsilyl)oxy)trisiloxan-3-yl)prop-1-en-1-yl)benzoate (41).**

$^1\text{H}$  NMR (400 MHz,  $\text{CDCl}_3$ )  $\delta$  8.13 (d,  $J$  = 8.0 Hz, 2 H), 7.38 (d,  $J$  = 8.0 Hz, 2 H), 7.24 (s, 1 H), 4.90 (d,  $J$  = 1.6 Hz, 2 H), 4.48 (q,  $J$  = 7.2 Hz, 2 H), 2.15 (s, 3 H), 1.49 (t,  $J$  = 7.2 Hz, 3 H), 0.26 (s, 27 H).

$^{13}\text{C}$  NMR (100 MHz,  $\text{CDCl}_3$ )  $\delta$  170.5, 166.2, 142.8, 141.3, 136.0, 129.5, 128.5, 62.8, 60.9, 21.1, 14.3, 1.7.

HRMS  $m/z$  (CI) calcd. for  $\text{C}_{23}\text{H}_{43}\text{O}_7\text{Si}_4$  ( $\text{M}+\text{H}$ ) $^+$  543.2087, found 543.2090.

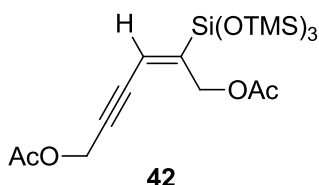

**(E)-2-(1,1,1,5,5,5-hexamethyl-3-((trimethylsilyl)oxy)trisiloxan-3-yl)hex-2-en-4-yne-1,6-diyl diacetate (42)**

was prepared as pale yellow oil according to the General Procedure in a yield of 84% (206.2 mg).

**<sup>1</sup>H NMR** (400 MHz, CDCl<sub>3</sub>) δ 6.34 (t, *J* = 6.0 Hz, 1 H), 4.84 (s, 2 H), 4.83 (d, *J* = 6.0 Hz, 2 H), 2.07 (d, *J* = 2.0 Hz, 6 H), 0.12 (s, 27 H).

**<sup>13</sup>C NMR** (100 MHz, CDCl<sub>3</sub>) δ 170.7, 170.2, 146.6, 122.2, 92.4, 83.9, 63.7, 52.9, 20.8, 20.6, 1.54.

**HRMS** *m/z* (CI) calcd. for C<sub>19</sub>H<sub>39</sub>O<sub>7</sub>Si<sub>4</sub> (M+H)<sup>+</sup> 491.1774, found 491.1768.

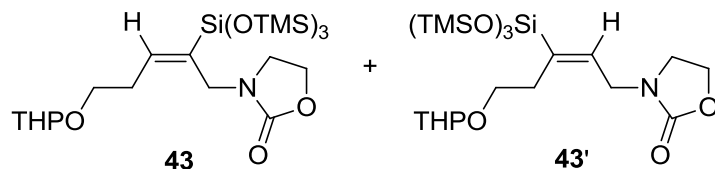

Compounds **43** and **43'** were prepared as a mixture according to the General Procedure in a total yield of 77% (211.7 mg) with an α/β ratio of 88:12.

**(*E*)-3-(2-(1,1,1,5,5,5-hexamethyl-3-((trimethylsilyl)oxy)trisiloxan-3-yl)-5-((tetrahydro-2H-pyran-2-yl)oxy)pent-2-en-1-yl)oxazolidin-2-one (43).**

**<sup>1</sup>H NMR** (400 MHz, CDCl<sub>3</sub>) δ 6.29 (t, *J* = 6.8 Hz, 1 H), 4.59 (t, *J* = 3.6 Hz, 1 H), 4.24 (t, *J* = 8.0 Hz, 2 H), 3.96 (s, 2 H), 3.83-3.78 (m, 2 H), 3.52-3.46 (m, 2 H), 3.43 (t, *J* = 8.0 Hz, 2 H), 2.47 (q, *J* = 6.4 Hz, 2 H), 1.79-1.52 (m, 6 H), 0.12 (s, 27 H).

**<sup>13</sup>C NMR** (100 MHz, CDCl<sub>3</sub>) δ 157.9, 145.2, 132.3, 98.7, 66.3, 62.0, 61.7, 43.9, 41.7, 30.6, 29.3, 25.4, 19.3, 1.7.

**HRMS** *m/z* (CI) calcd. for C<sub>22</sub>H<sub>48</sub>NO<sub>7</sub>Si<sub>4</sub> (M+H)<sup>+</sup> 550.2509, found 550.2497.

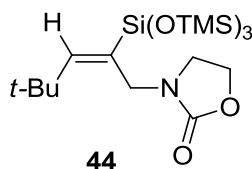

**(*E*)-3-(2-(1,1,1,5,5,5-hexamethyl-3-((trimethylsilyl)oxy)trisiloxan-3-yl)-4,4-dimethylpent-2-en-1-yl)oxazolidin-2-one (44)** was prepared as white solid according to the General Procedure in a yield of 81% (193.5mg).

**<sup>1</sup>H NMR** (400 MHz, CDCl<sub>3</sub>) δ 6.19 (t, *J* = 1.2 Hz, 1 H), 4.24 (t, *J* = 7.6 Hz, 2 H), 4.13 (d, *J* = 1.2 Hz, 2 H), 3.48 (t, *J* = 7.6 Hz, 2 H), 1.16 (s, 9 H), 0.12 (s, 27 H).

**<sup>13</sup>C NMR** (100 MHz, CDCl<sub>3</sub>) δ 158.1, 156.9, 130.4, 61.8, 44.1, 42.2, 34.7, 31.1, 1.7.

**HRMS** *m/z* (CI) calcd. for C<sub>19</sub>H<sub>44</sub>NO<sub>5</sub>Si<sub>4</sub> (M+H)<sup>+</sup> 478.2297, found 478.2308.

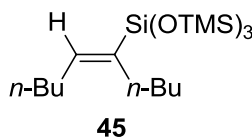

**(*E*)-3-(dec-5-en-5-yl)-1,1,1,5,5,5-hexamethyl-3-((trimethylsilyl)oxy)trisiloxane (45)** was prepared as colorless oil according to the General Procedure in a yield of 40% (87.0 mg).

**<sup>1</sup>H NMR** (400 MHz, CDCl<sub>3</sub>) δ 5.89 (t, *J* = 7.2 Hz, 1 H), 2.11-2.04 (m, 4 H), 1.36-1.29 (m, 8 H), 0.91 (t, *J* = 6.4 Hz, 6 H), 0.10 (s, 27 H).

**<sup>13</sup>C NMR** (100 MHz, CDCl<sub>3</sub>) δ 142.6, 136.3, 32.2, 31.6, 29.0, 27.8, 23.1, 22.5, 14.1, 14.0, 1.8.

**HRMS** *m/z* (CI) calcd. for C<sub>19</sub>H<sub>47</sub>O<sub>3</sub>Si<sub>4</sub> (M+H)<sup>+</sup> 435.2603, found 435.2599.

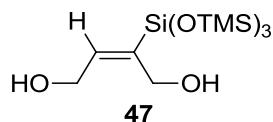

**(E)-2-(1,1,1,5,5,5-hexamethyl-3-((trimethylsilyl)oxy)trisiloxan-3-yl)but-2-ene-1,4-diol (47)** was prepared as white solid according to the General Procedure in a yield of 93% (178.0 mg).

**<sup>1</sup>H NMR** (400 MHz, CDCl<sub>3</sub>) δ 6.21 (t, *J* = 6.0 Hz, 1 H), 4.28 (d, *J* = 6 Hz, 2 H), 4.25 (s, 2 H), 2.18 (s, 2 H), 0.127 (s, 27 H).

**<sup>13</sup>C NMR** (100 MHz, CDCl<sub>3</sub>) δ 142.8, 105.0, 60.0, 59.7, 1.9, 1.7.

**HRMS** *m/z* (CI) calcd. for C<sub>13</sub>H<sub>35</sub>O<sub>5</sub>Si<sub>4</sub> (M+H)<sup>+</sup> 383.1562, found 383.1546.

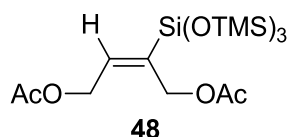

**(E)-2-(1,1,1,5,5,5-hexamethyl-3-((trimethylsilyl)oxy)trisiloxan-3-yl)but-2-ene-1,4-diyl diacetate (48)** was prepared as colorless oil according to the General Procedure in a yield of 95% (221.7 mg).

**<sup>1</sup>H NMR** (400 MHz, CDCl<sub>3</sub>) δ 6.13 (tt, *J* = 0.8, 6.0 Hz, 1 H), 4.72 (d, *J* = 6.0 Hz, 2H), 4.67 (s, 2 H), 2.07 (s, 3 H), 2.04 (s, 3 H), 0.11 (s, 27 H).

**<sup>13</sup>C NMR** (100 MHz, CDCl<sub>3</sub>) δ 170.6, 139.8, 135.0, 61.7, 61.3, 21.0, 20.8, 1.7.

**HRMS** *m/z* (CI) calcd. for C<sub>17</sub>H<sub>39</sub>O<sub>7</sub>Si<sub>4</sub> (M+H)<sup>+</sup> 467.1774, found 467.1783.

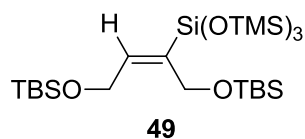

**(E)-1,1,1,5,5,5-hexamethyl-3-(2,2,3,3,10,10,11,11-octamethyl-4,9-dioxa-3,10-disiladodec-6-en-6-yl)-3-((trimethylsilyl)oxy)trisiloxane (49)** was prepared as colorless oil according to the General Procedure in a yield of 90% (275.1 mg).

**<sup>1</sup>H NMR** (400 MHz, CDCl<sub>3</sub>) δ 6.07 (t, *J* = 4.8 Hz, 1 H), 4.45 (d, *J* = 4.8 Hz, 2 H), 4.18 (d, *J* = 1.2 Hz, 2 H), 0.09 (d, *J* = 2.0 Hz, 18 H), 0.11 (s, 27 H), 0.06 (d, *J* = 1.2 Hz, 12 H).

**<sup>13</sup>C NMR** (100 MHz, CDCl<sub>3</sub>) δ 146.0, 134.2, 62.0, 61.2, 26.0, 25.9, 18.3, 1.8, -5.2, -5.5.

**HRMS** *m/z* (CI) calcd. for C<sub>25</sub>H<sub>63</sub>O<sub>5</sub>Si<sub>6</sub> (M+H)<sup>+</sup> 611.3292, found 611.3276.

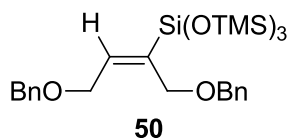

**(E)-3-(1,4-bis(benzyloxy)but-2-en-2-yl)-1,1,5,5,5-hexamethyl-3-((trimethylsilyl)oxy)trisiloxane (50)** was prepared as colorless oil according to the General Procedure in a yield of 90% (253.4 mg).

**<sup>1</sup>H NMR** (400 MHz, CDCl<sub>3</sub>) δ 7.39-7.27 (m, 10 H), 6.30 (t, *J* = 5.2 Hz, 1 H), 4.50 (s, 2 H), 4.45 (s, 2 H), 4.20 (d, *J* = 5.2 Hz, 2 H), 4.06 (s, 2 H), 0.13 (s, 27 H).

**<sup>13</sup>C NMR** (100 MHz, CDCl<sub>3</sub>) δ 142.9, 138.5, 138.3, 135.8, 128.3, 128.2, 127.7, 127.7, 127.5, 127.4, 72.3, 72.2, 67.6, 67.6, 1.8.

**HRMS** *m/z* (CI) calcd. for C<sub>27</sub>H<sub>47</sub>O<sub>5</sub>Si<sub>4</sub> (M+H)<sup>+</sup> 563.2501, found 563.2523.

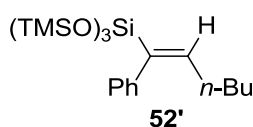

**(E)-1,1,5,5,5-hexamethyl-3-(1-phenylhex-1-en-1-yl)-3-((trimethylsilyl)oxy)trisiloxane (52')** was prepared as colorless oil according to the General Procedure in a yield of 50% (113.7 mg).

**<sup>1</sup>H NMR** (400 MHz, CDCl<sub>3</sub>) δ 7.29-7.24 (m, 2 H), 7.18-7.14 (m, 1 H), 7.06-7.04 (s, 2 H), 6.17 (t, *J* = 7.2 Hz, 1 H), 2.01 (q, *J* = 7.2 Hz, 2 H), 1.36-1.23 (m, 4 H), 0.84 (t, *J* = 7.2 Hz, 3 H), 0.04 (s, 27 H).

**<sup>13</sup>C NMR** (100 MHz, CDCl<sub>3</sub>) δ 144.2, 141.1, 139.0, 128.6, 127.6, 125.4, 31.6, 29.3, 22.3, 13.9, 1.6.

**HRMS** *m/z* (CI) calcd. for C<sub>21</sub>H<sub>43</sub>O<sub>3</sub>Si<sub>4</sub> (M+H)<sup>+</sup> 455.2290, found 455.2301.

### III. $^1\text{H}$ NMR and $^{13}\text{C}$ NMR Spectra

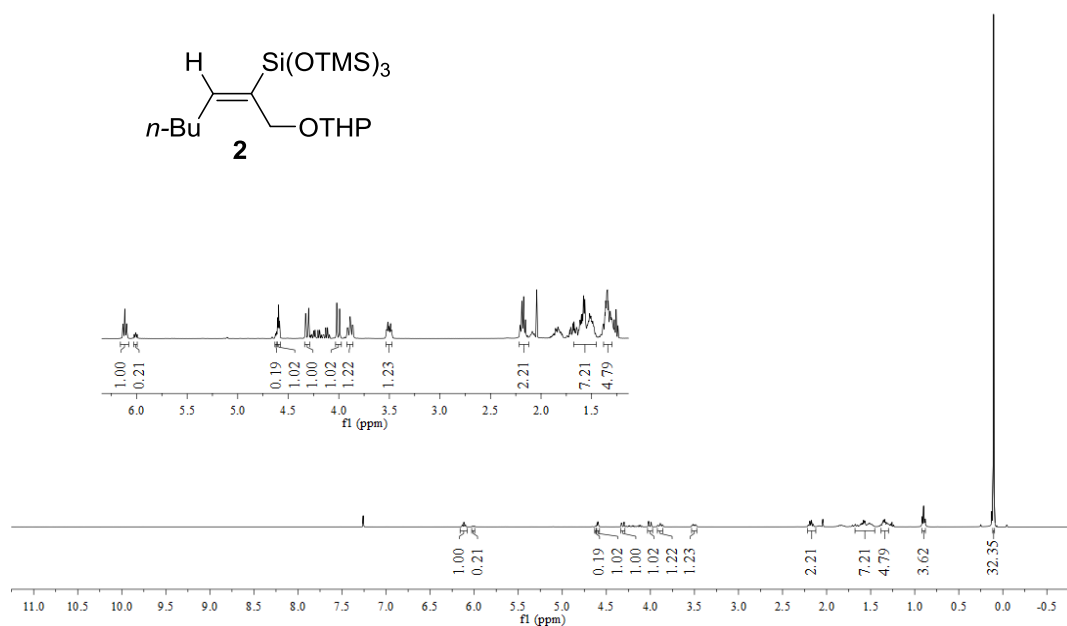

Figure S1.  $^1\text{H}$  NMR spectra of **2**. (83:17  $\alpha/\beta$ )

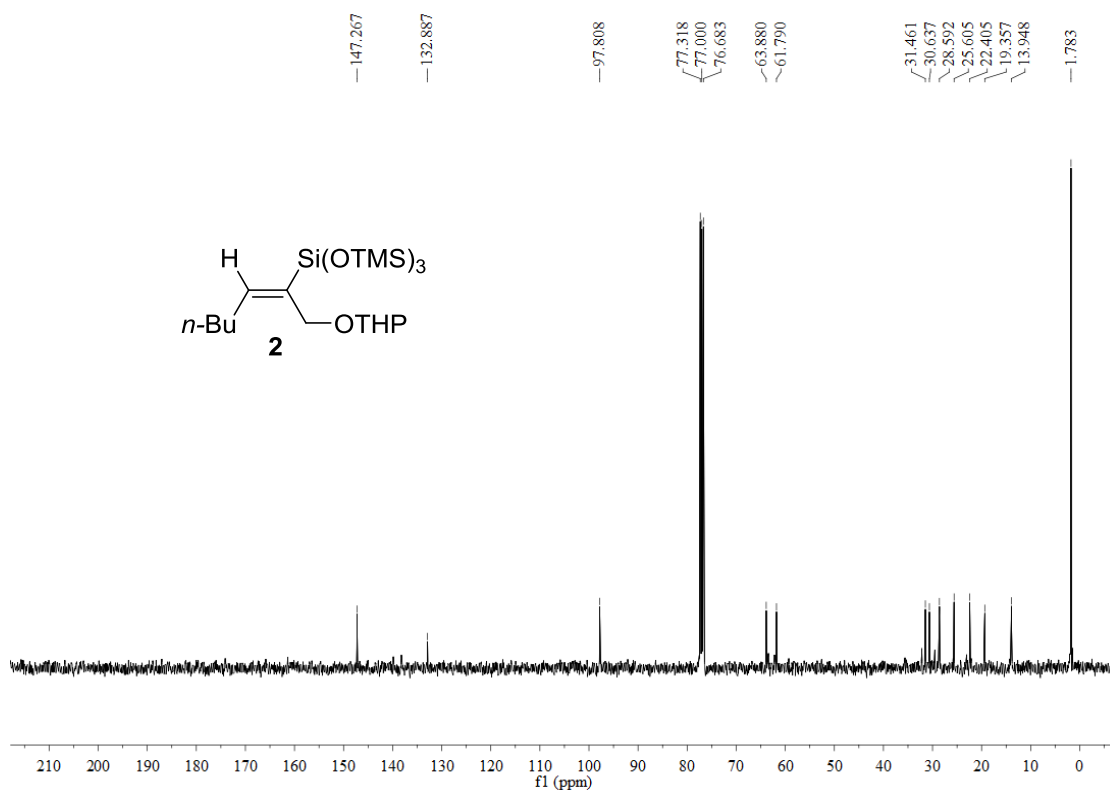

Figure S2.  $^{13}\text{C}$  NMR spectra of **2**.



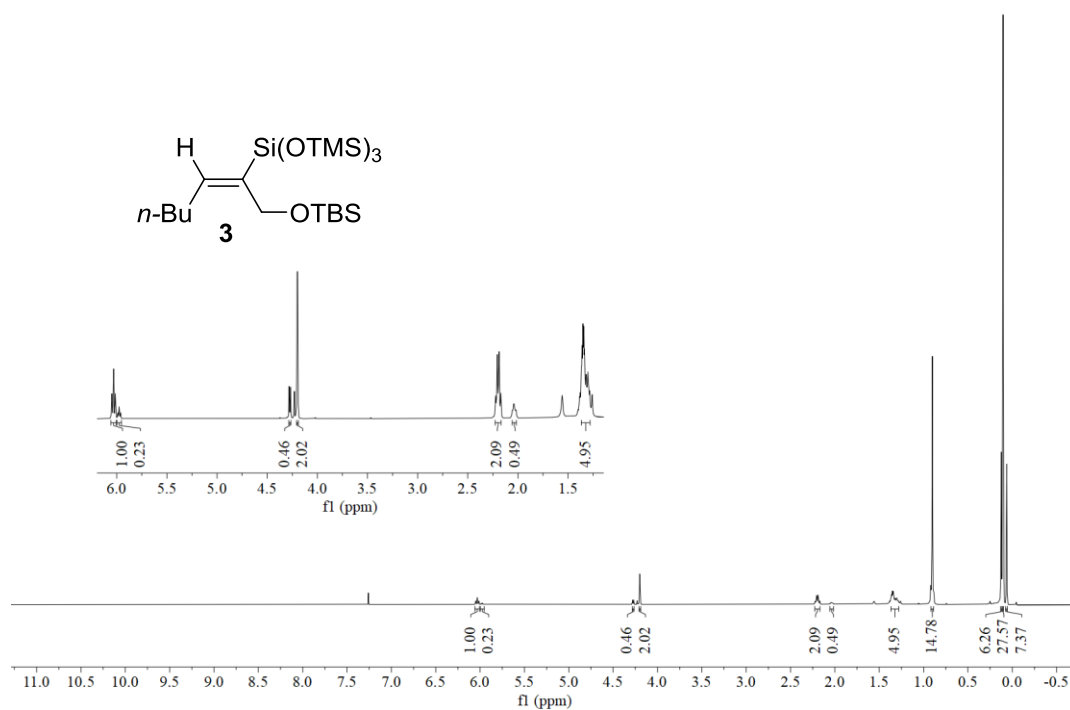

**Figure S3.** <sup>1</sup>H NMR spectra of **3**. (81:19  $\alpha/\beta$ ).

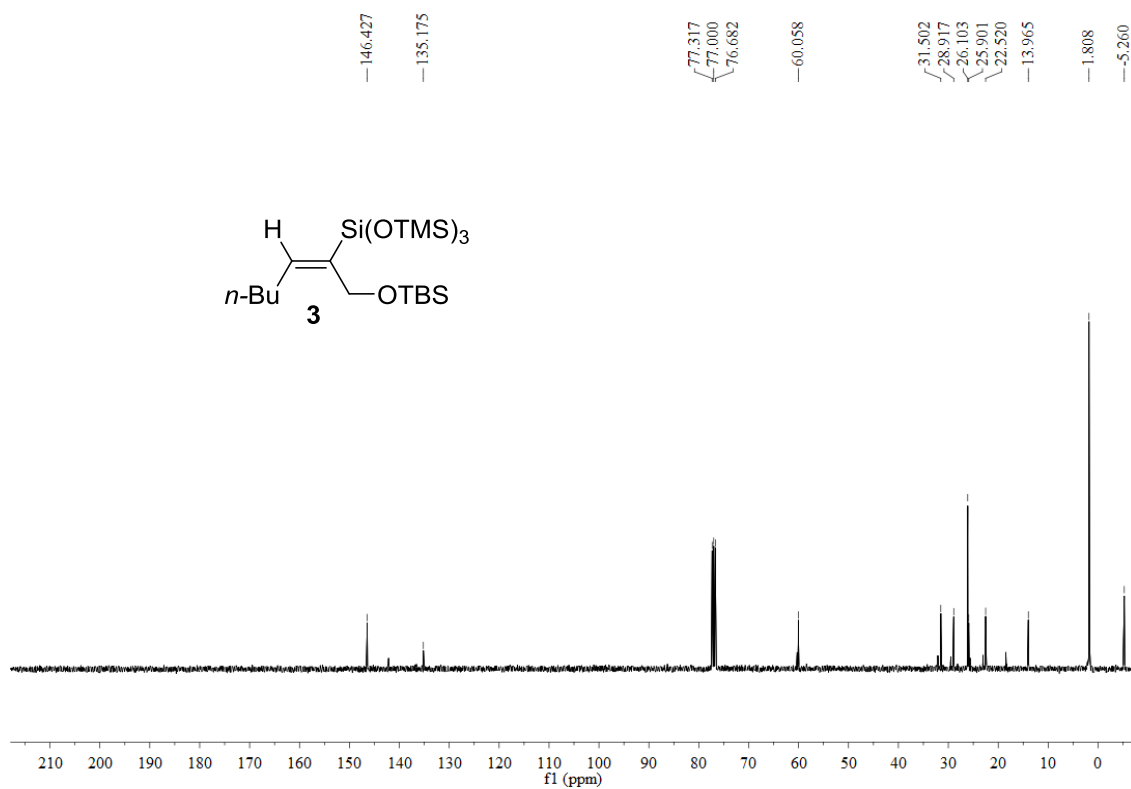

**Figure S4.** <sup>13</sup>C NMR spectra of **3**.

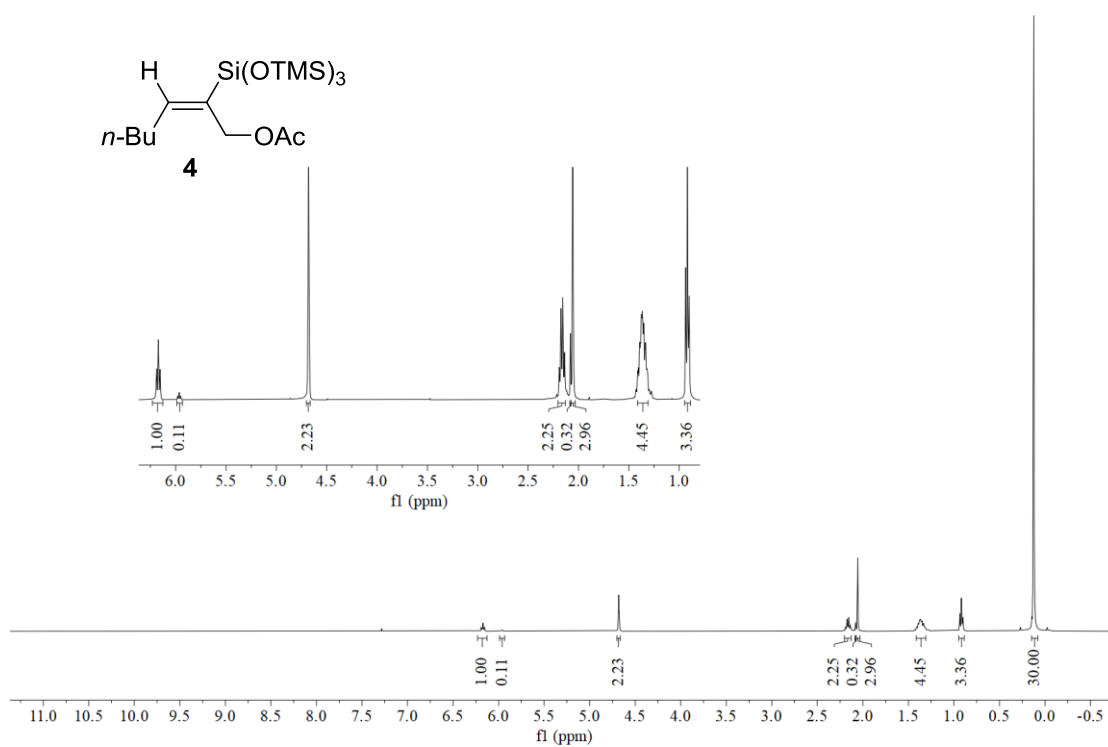

**Figure S5.** <sup>1</sup>H NMR spectra of **4**. (90:10  $\alpha/\beta$ )

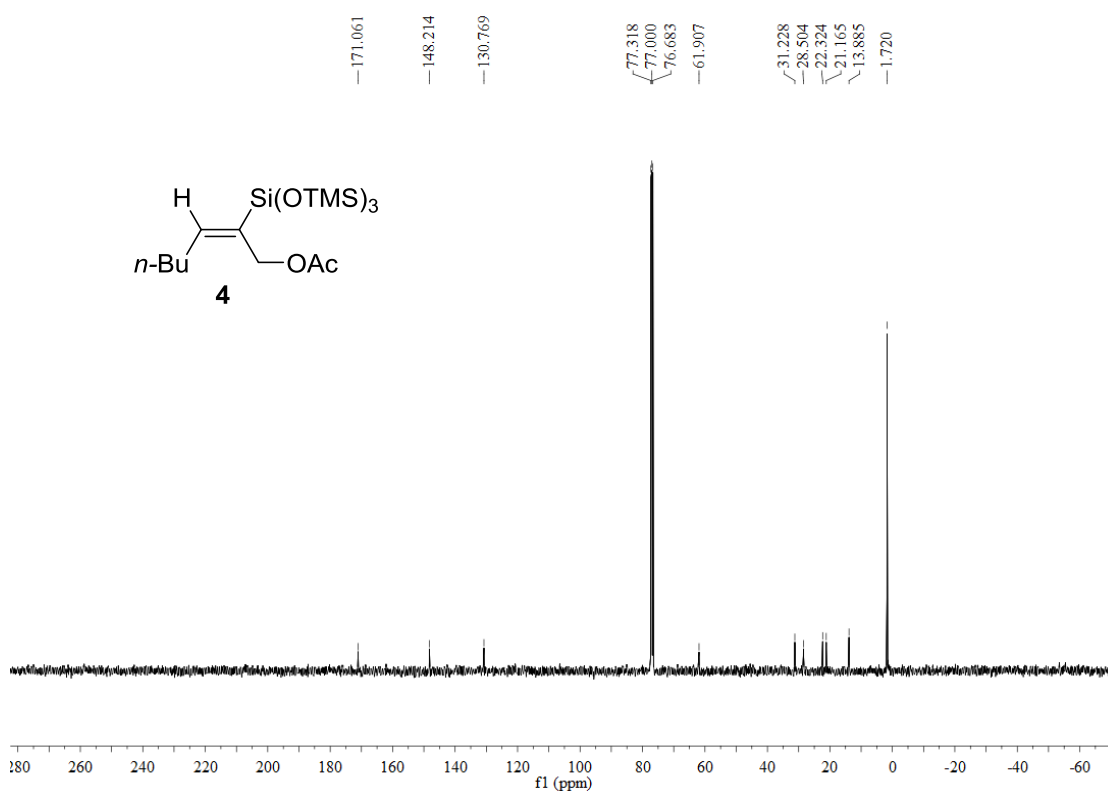

**Figure S6.** <sup>13</sup>C NMR spectra of **4**.

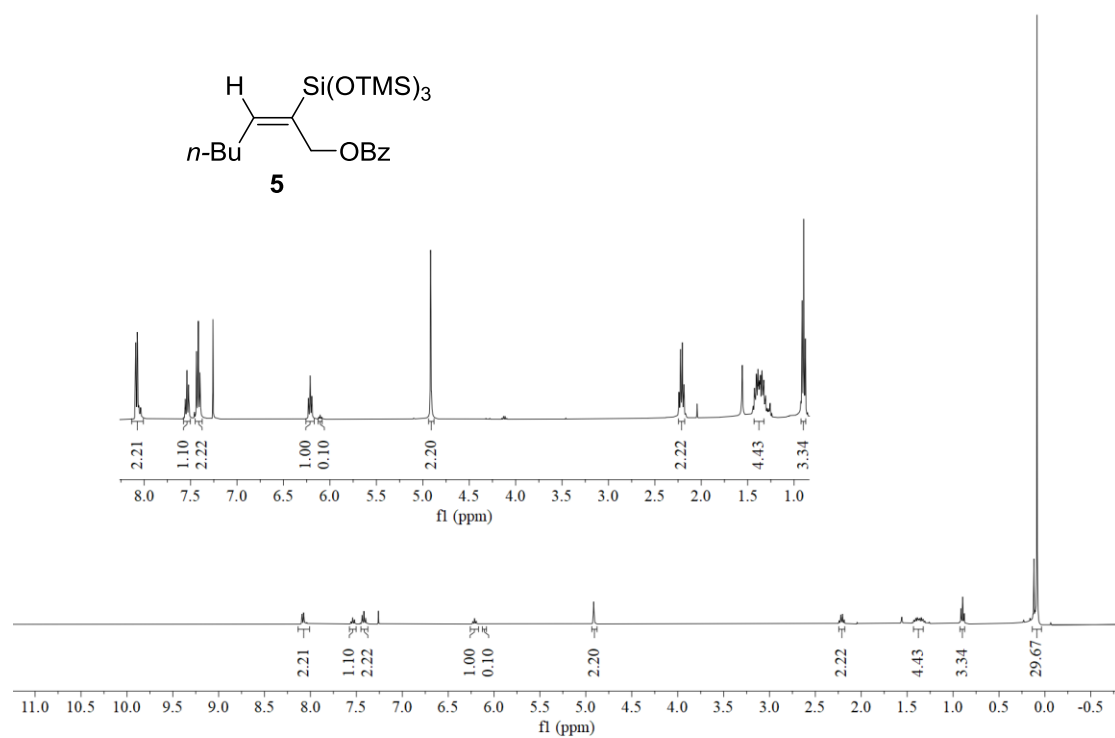

**Figure S7.**  $^1\text{H}$  NMR spectra of **5**. (91:9  $\alpha/\beta$ )

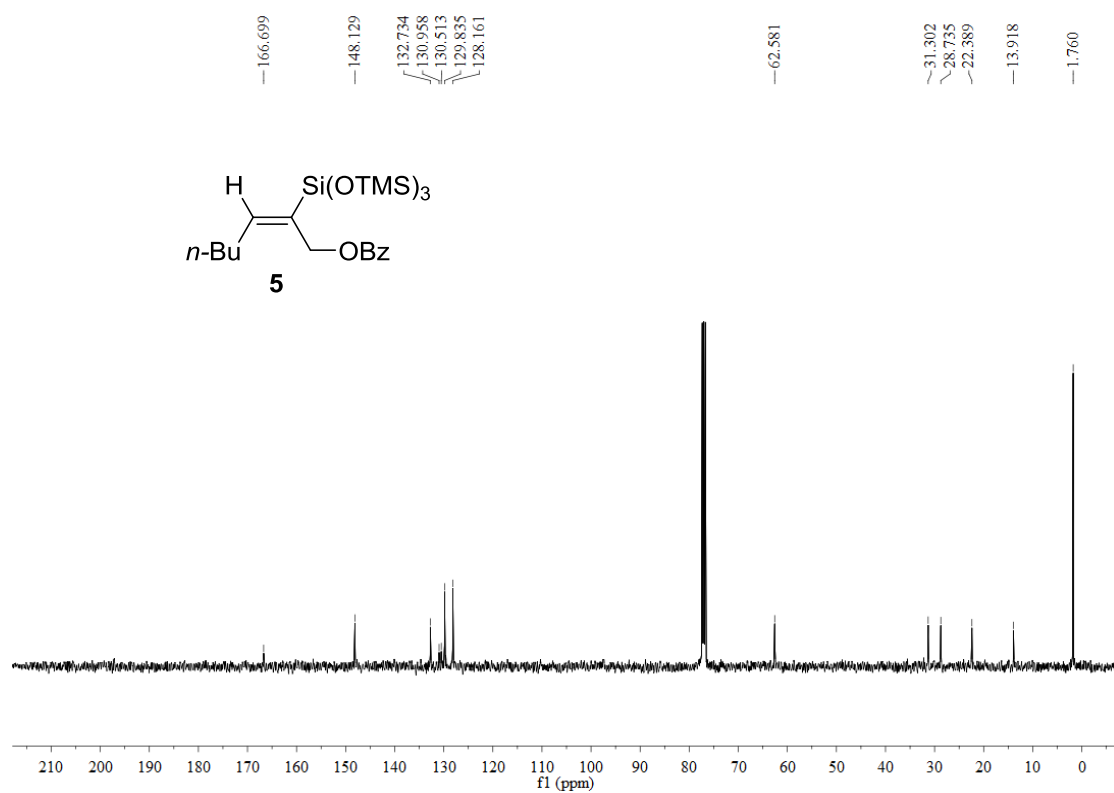

**Figure S8.**  $^{13}\text{C}$  NMR spectra of **5**.

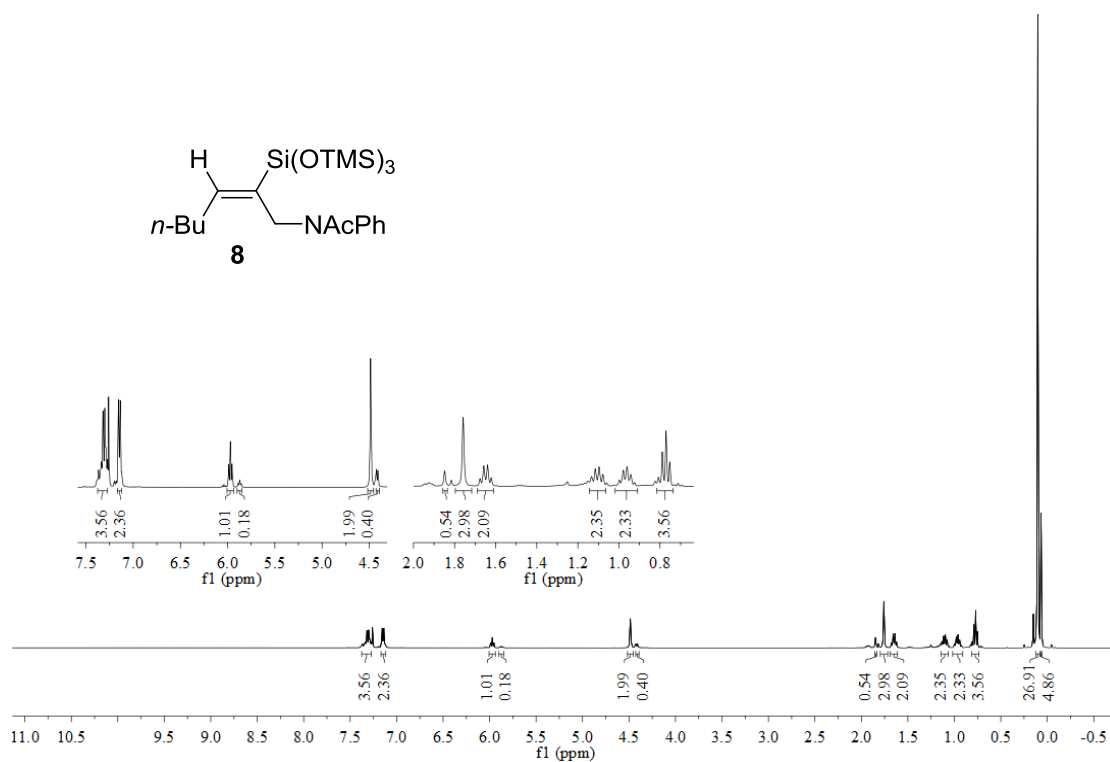

**Figure S9.**  $^1\text{H}$  NMR spectra of **8**. (85:15  $\alpha/\beta$ )

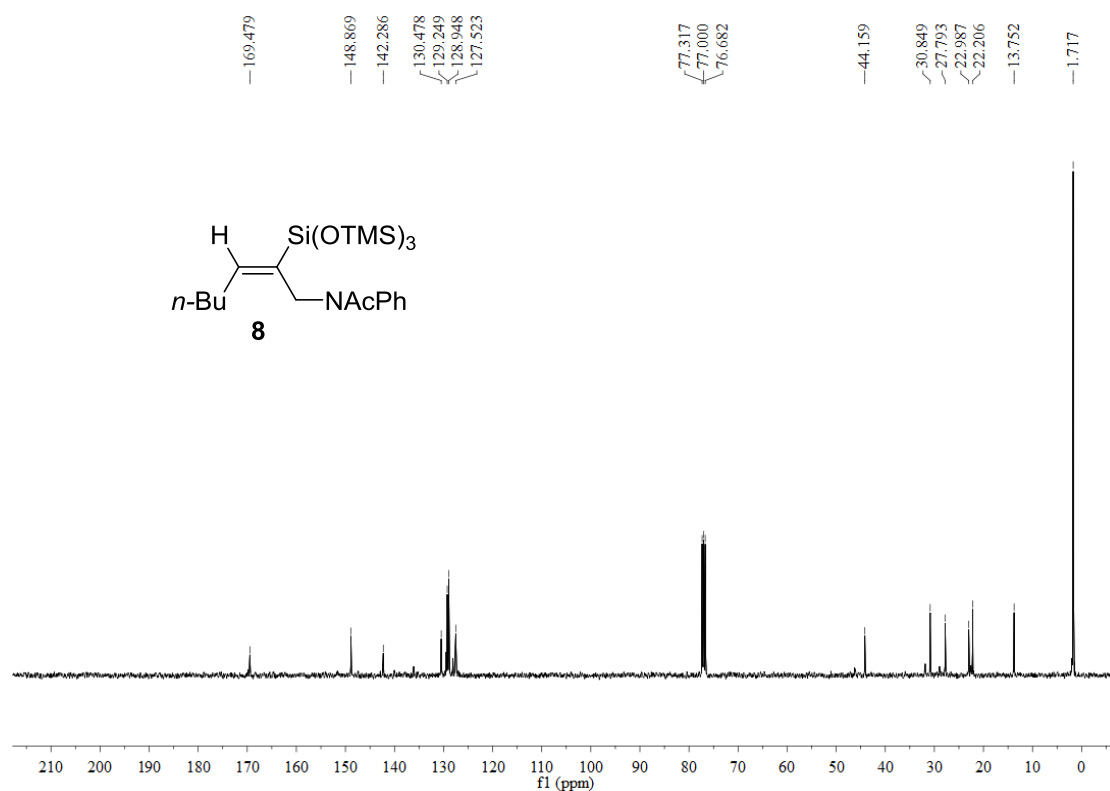

**Figure S10.**  $^{13}\text{C}$  NMR spectra of **8**.

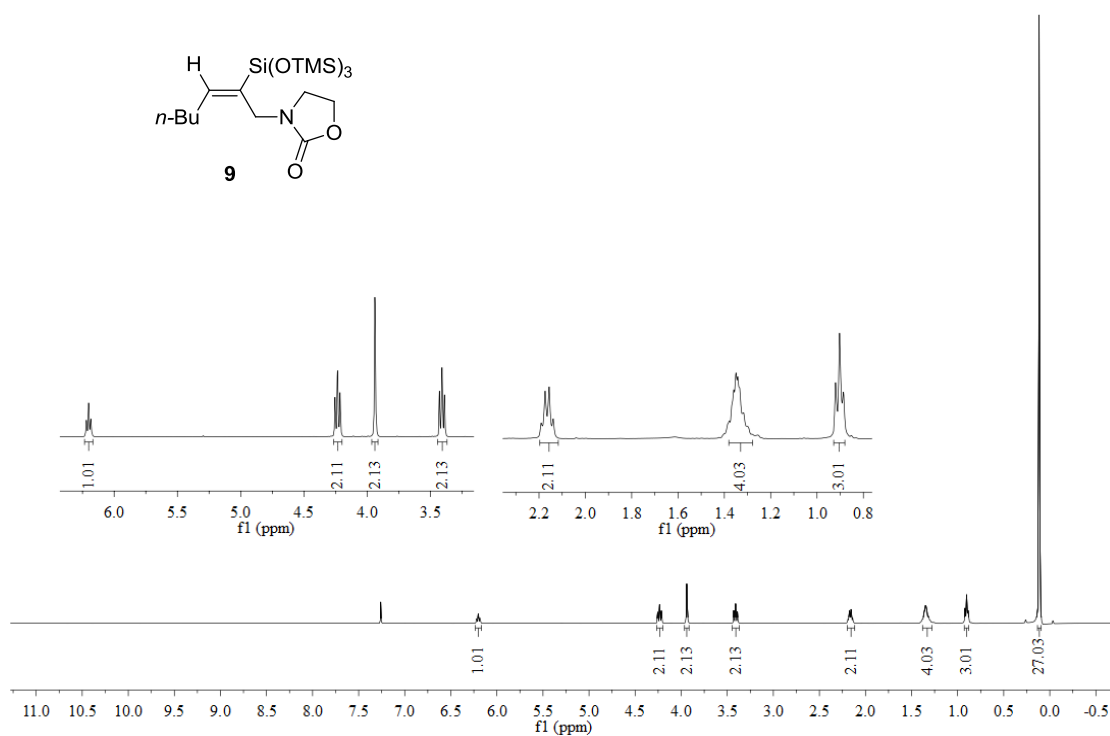

**Figure S11.** <sup>1</sup>H NMR spectra of **9**. (89:11  $\alpha/\beta$ ).

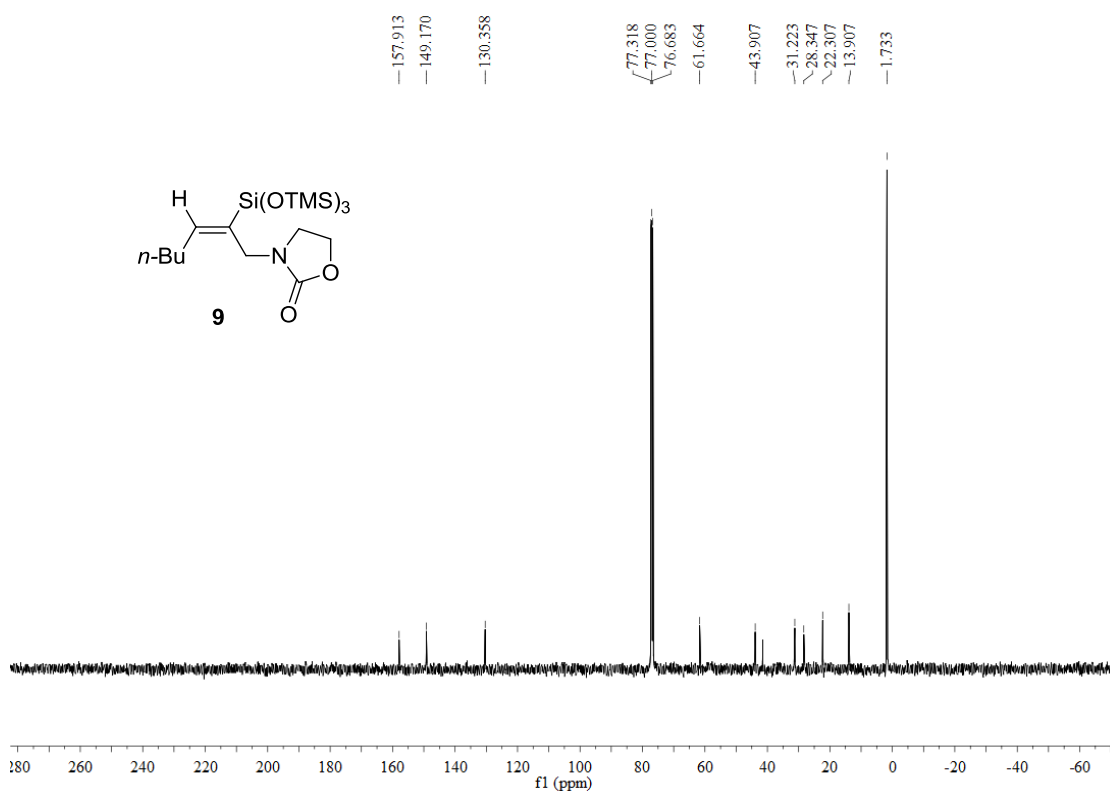

**Figure S12.** <sup>13</sup>C NMR spectra of **9**.

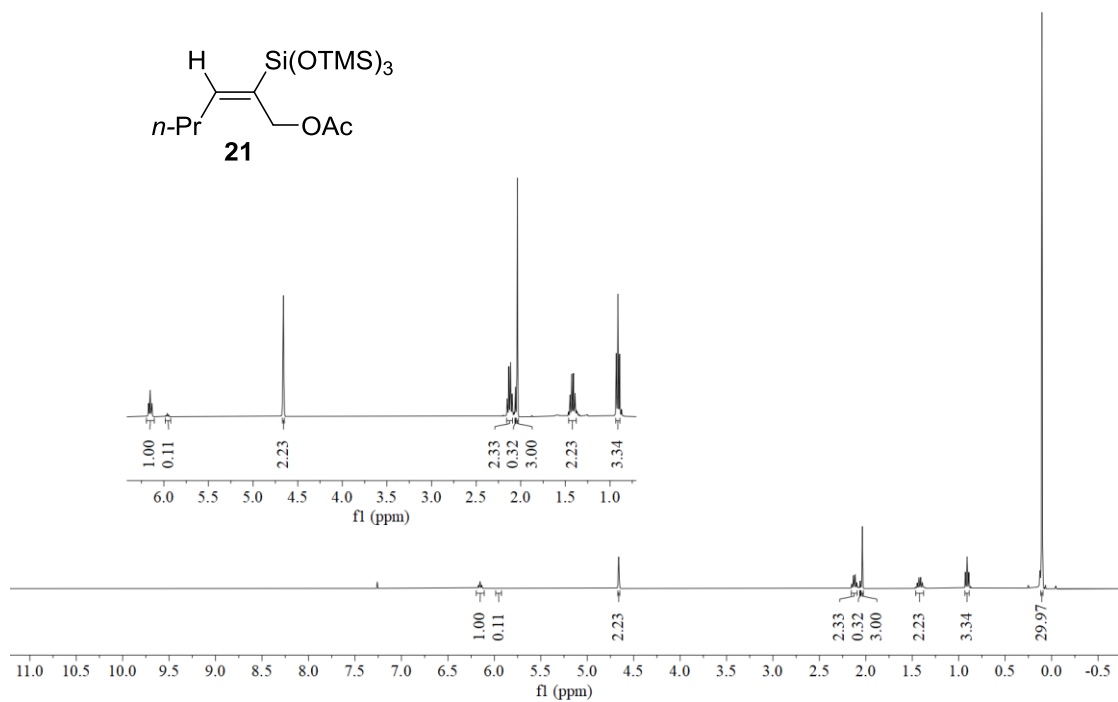

**Figure S13.** <sup>1</sup>H NMR spectra of **21**. (90:10  $\alpha/\beta$ ).

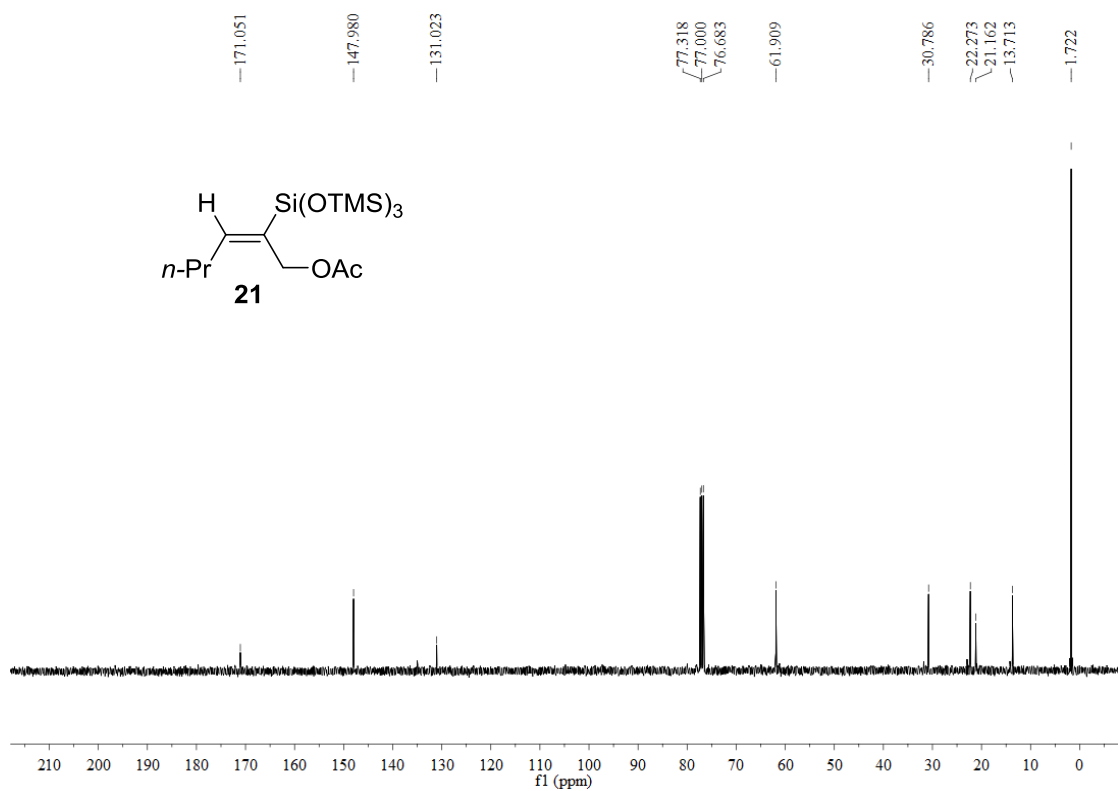

**Figure S14.** <sup>13</sup>C NMR spectra of **21**.



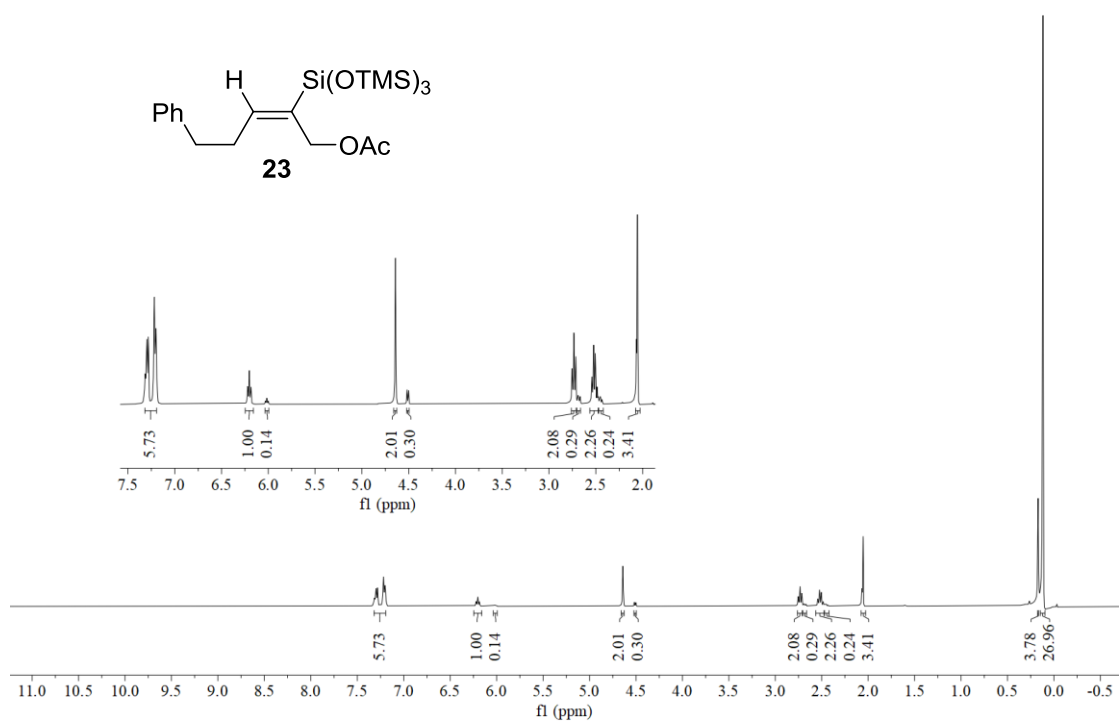

**Figure S17.** <sup>1</sup>H NMR spectra of **23**. (88:12  $\alpha/\beta$ )

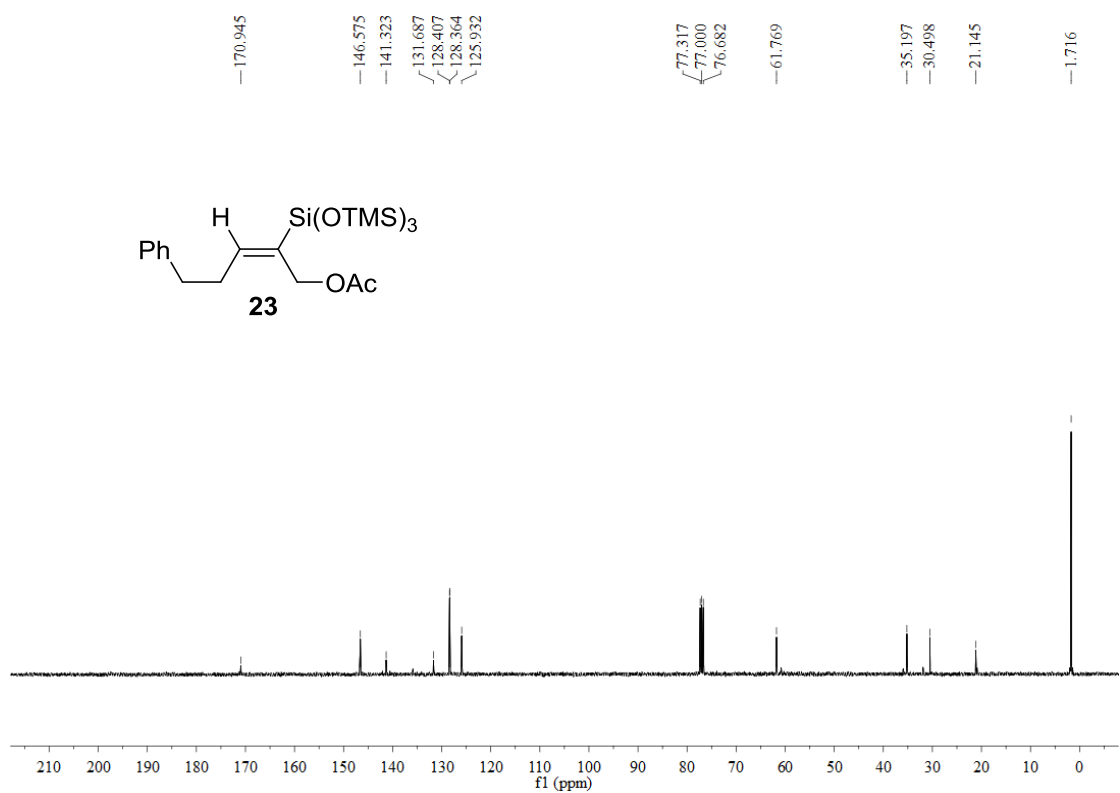

**Figure S18.** <sup>13</sup>C NMR spectra of **23**.



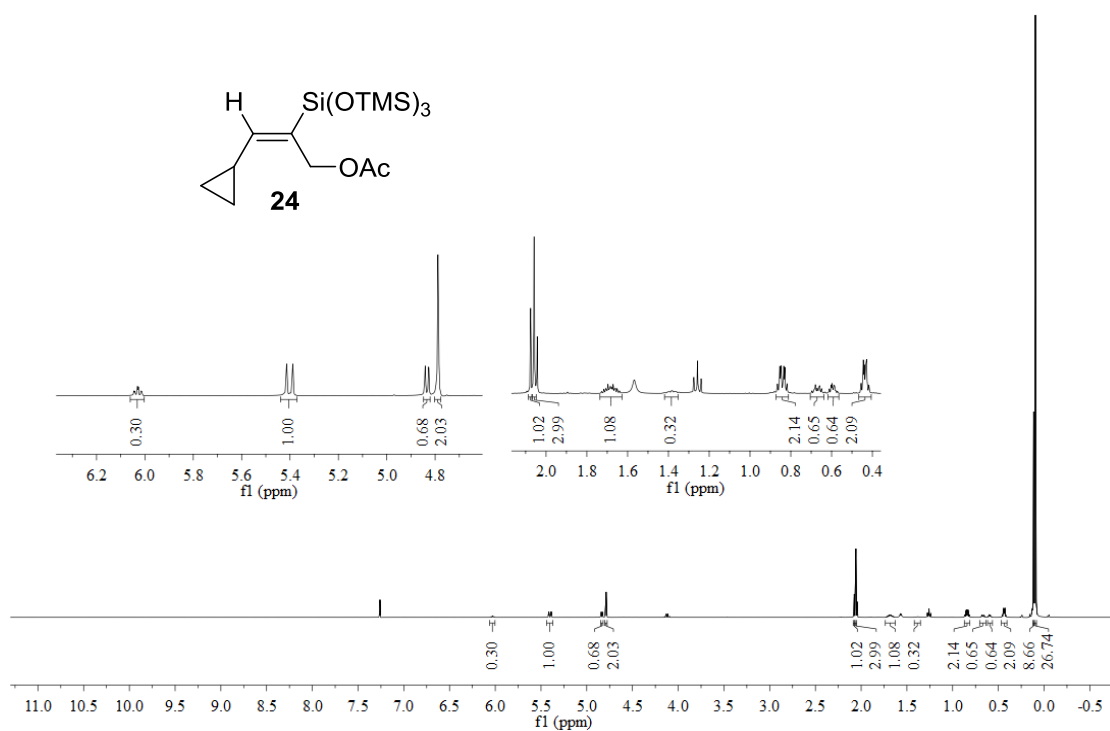

**Figure S19.** <sup>1</sup>H NMR spectra of **24**. (75:25  $\alpha/\beta$ )

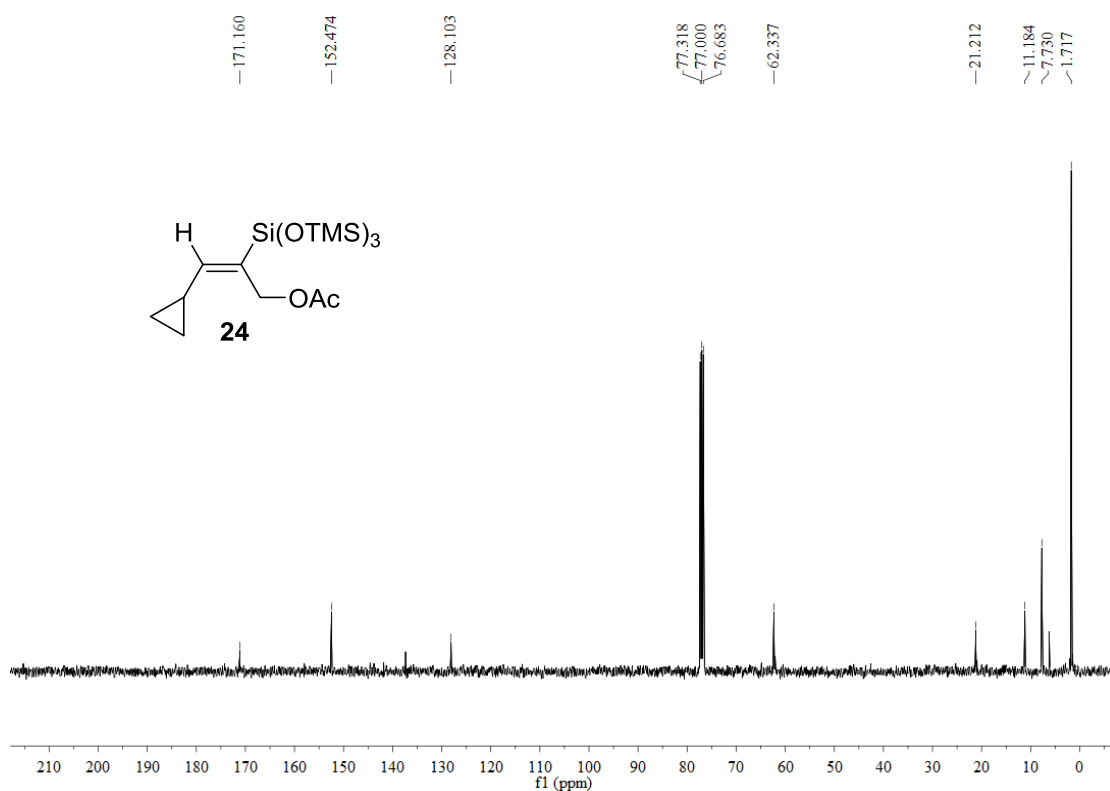

**Figure S20.** <sup>13</sup>C NMR spectra of **24**.

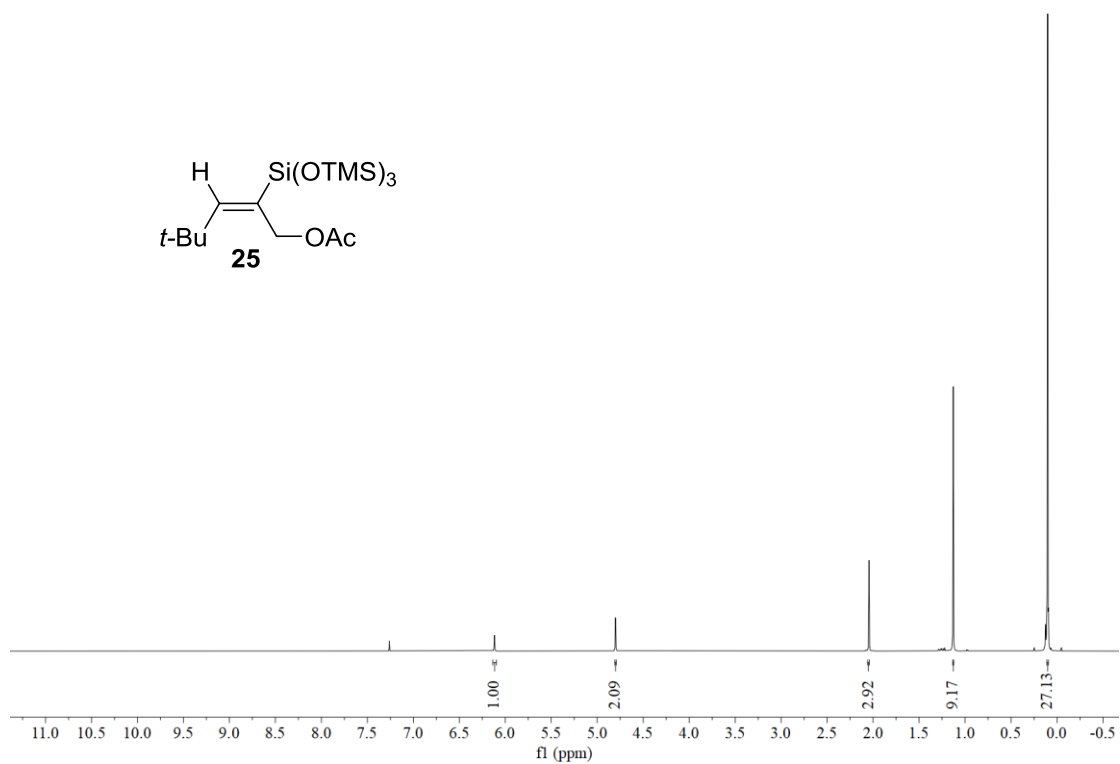

**Figure S21.** <sup>1</sup>H NMR spectra of **25**. (100:0  $\alpha/\beta$ )

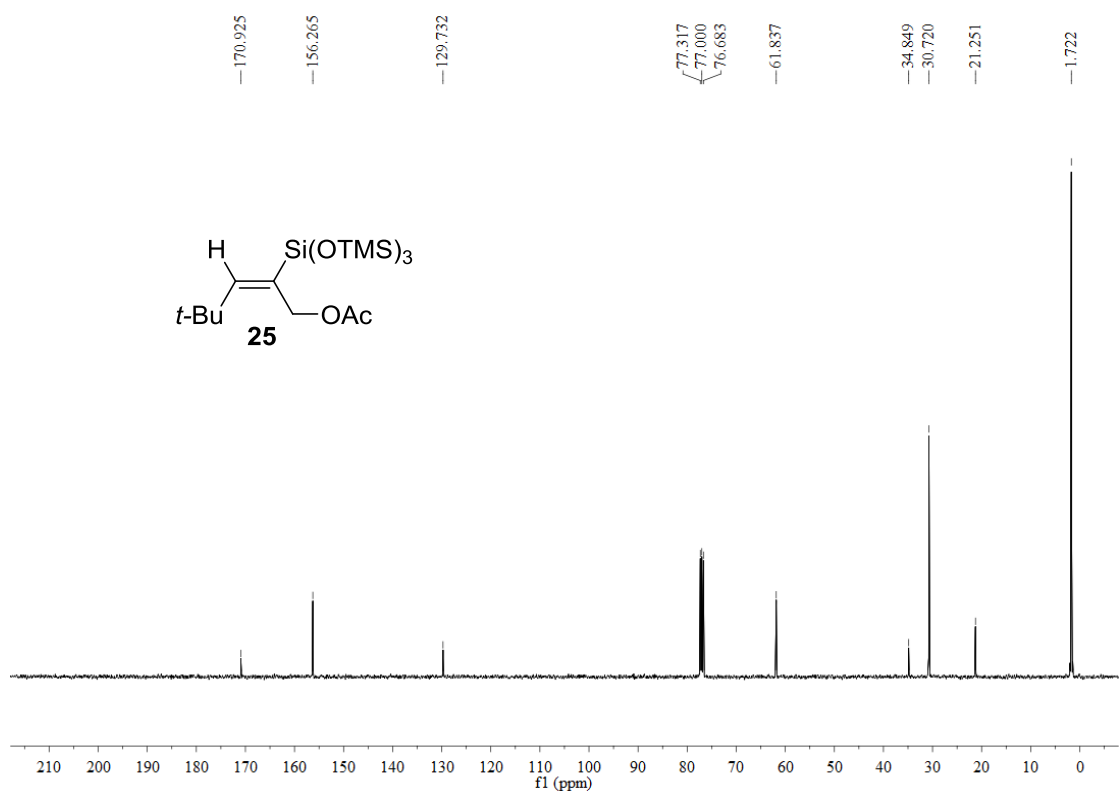

**Figure S22.** <sup>13</sup>C NMR spectra of **25**.

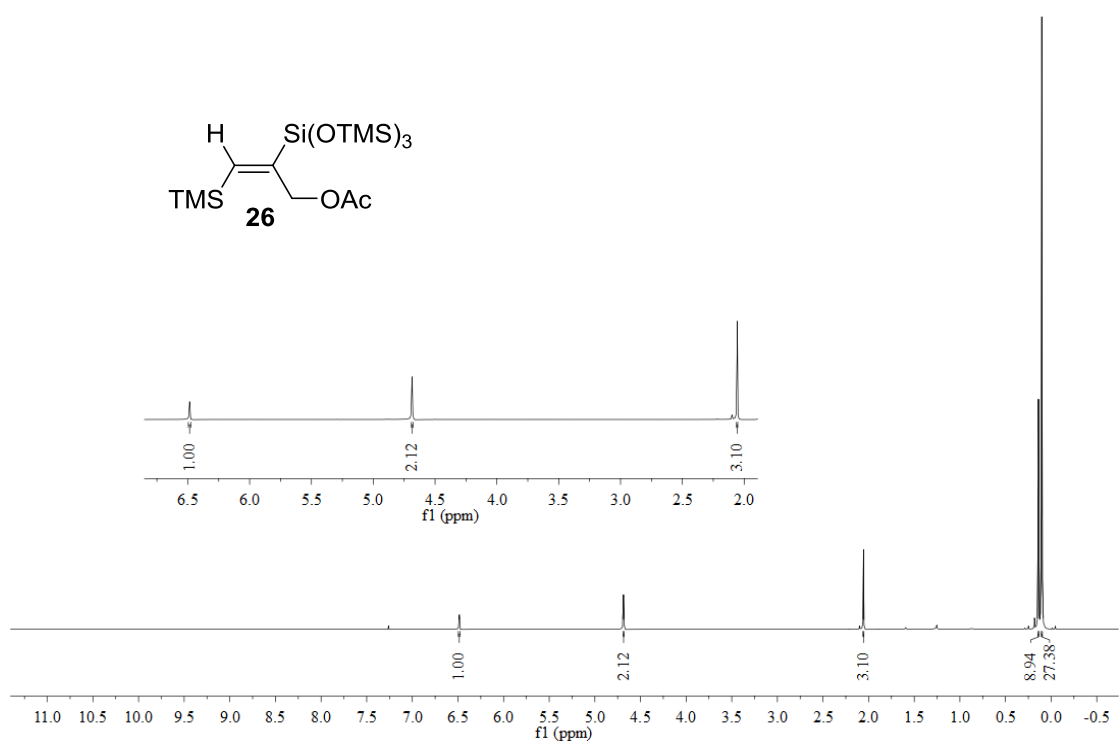

**Figure S23.** <sup>1</sup>H NMR spectra of **26**. (100:0  $\alpha/\beta$ )

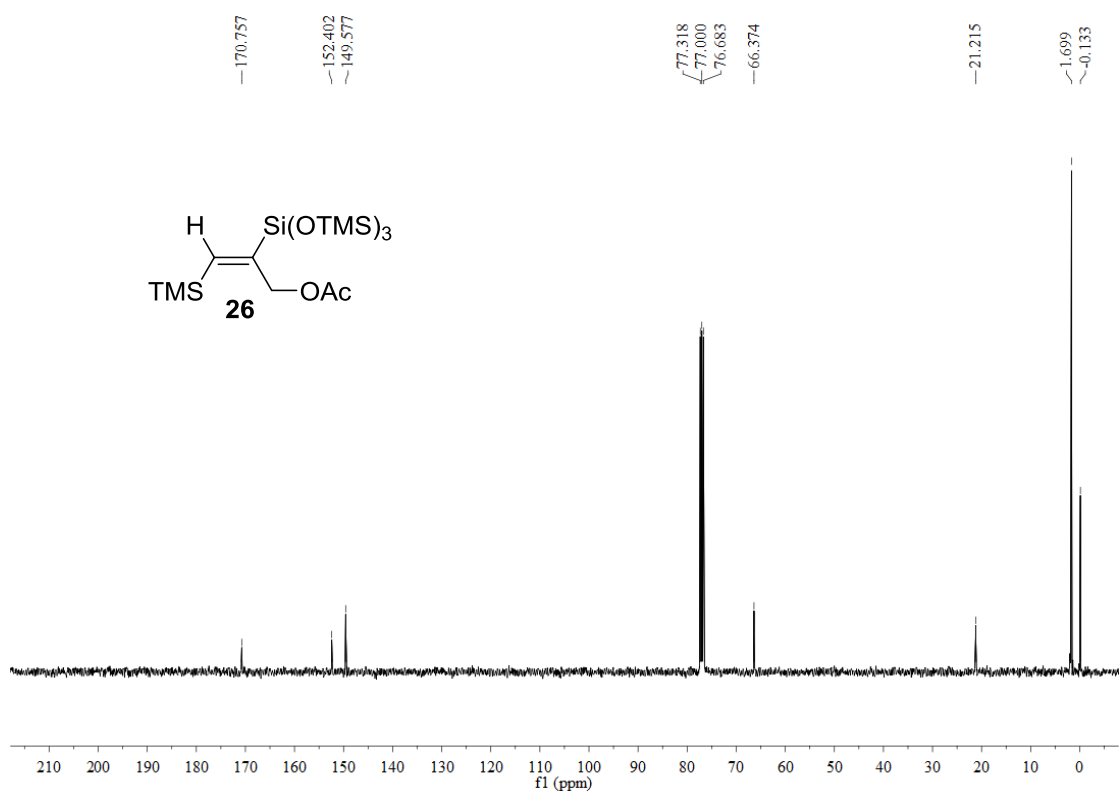

**Figure S24.** <sup>13</sup>C NMR spectra of **26**.

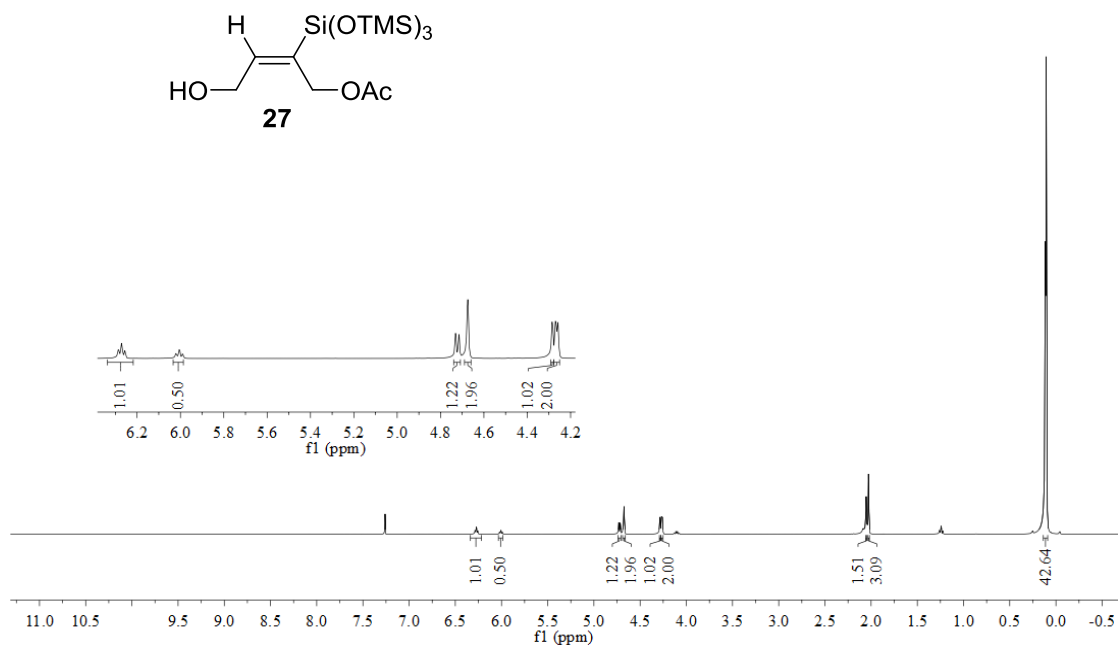

**Figure S25.** <sup>1</sup>H NMR spectra of **27**. (67:33  $\alpha/\beta$ )

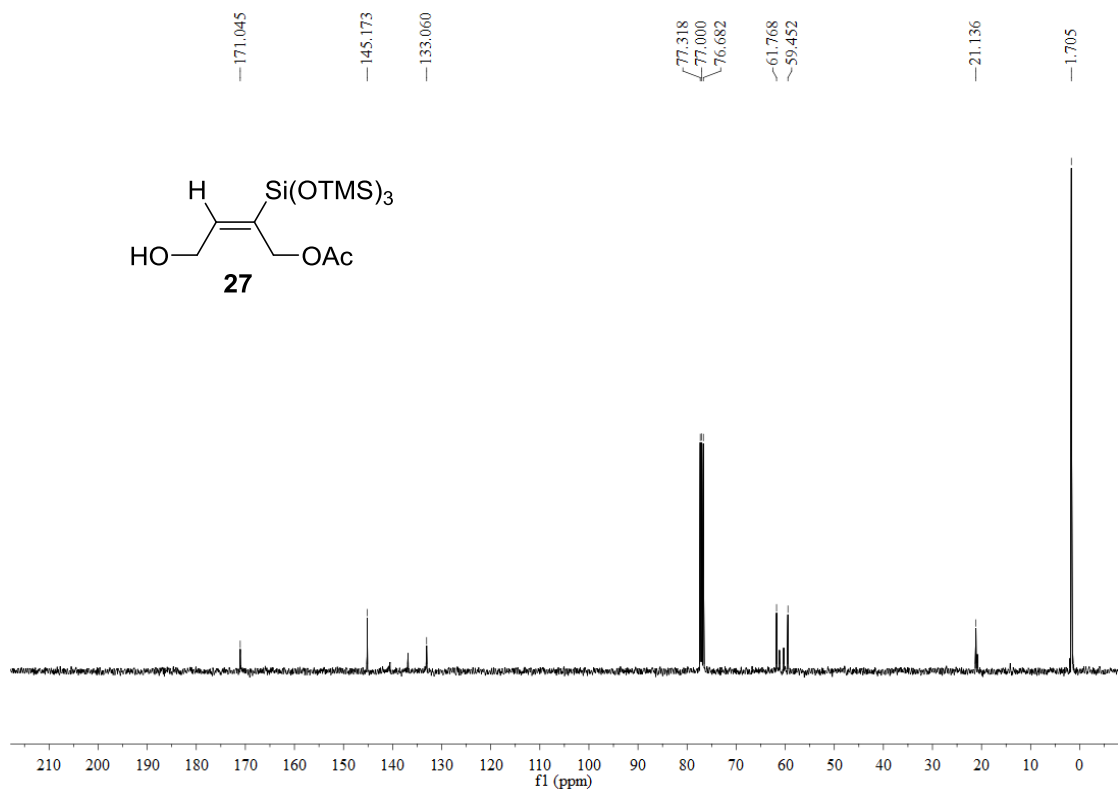

**Figure S26.** <sup>13</sup>C NMR spectra of **27**.

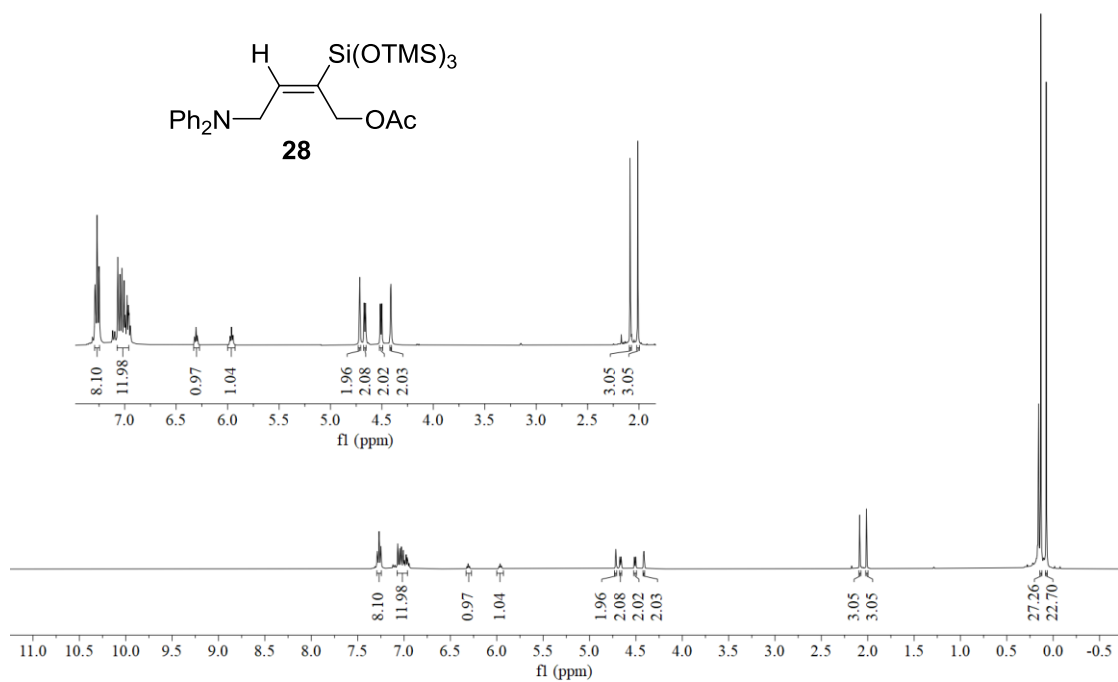

**Figure S27.**  $^1\text{H}$  NMR spectra of **28**. (50:50  $\alpha/\beta$ )

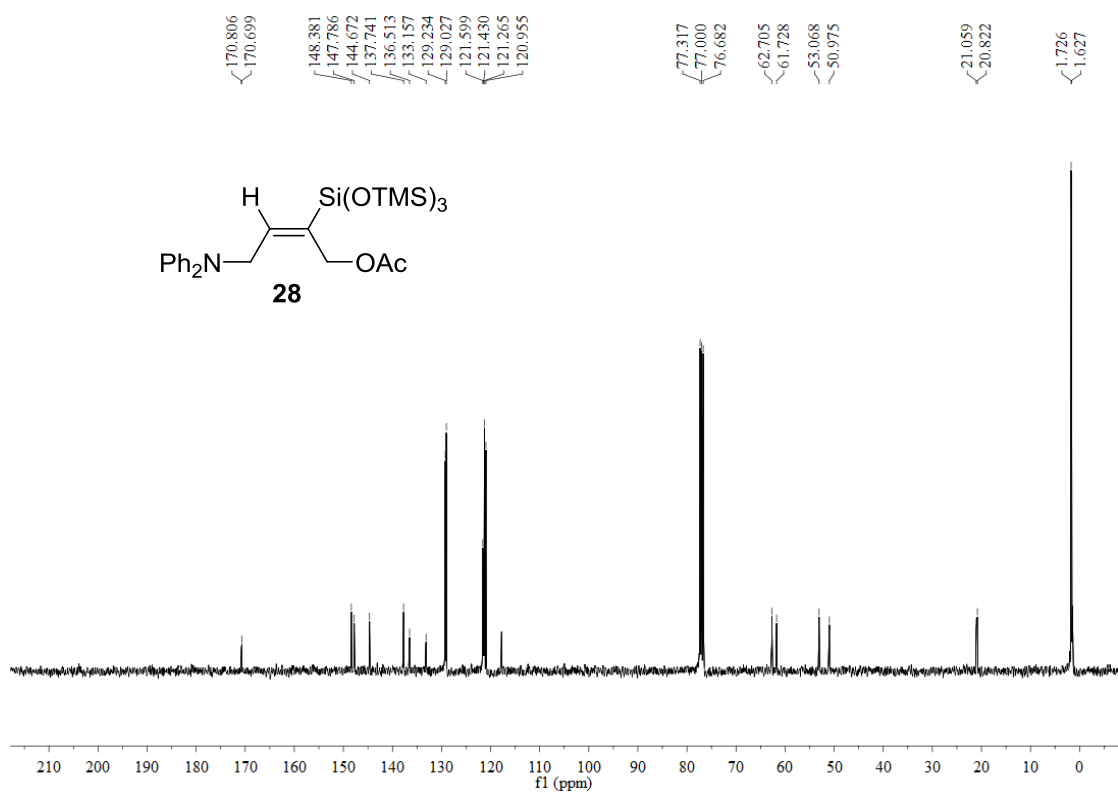

**Figure S28.**  $^{13}\text{C}$  NMR spectra of **28**.

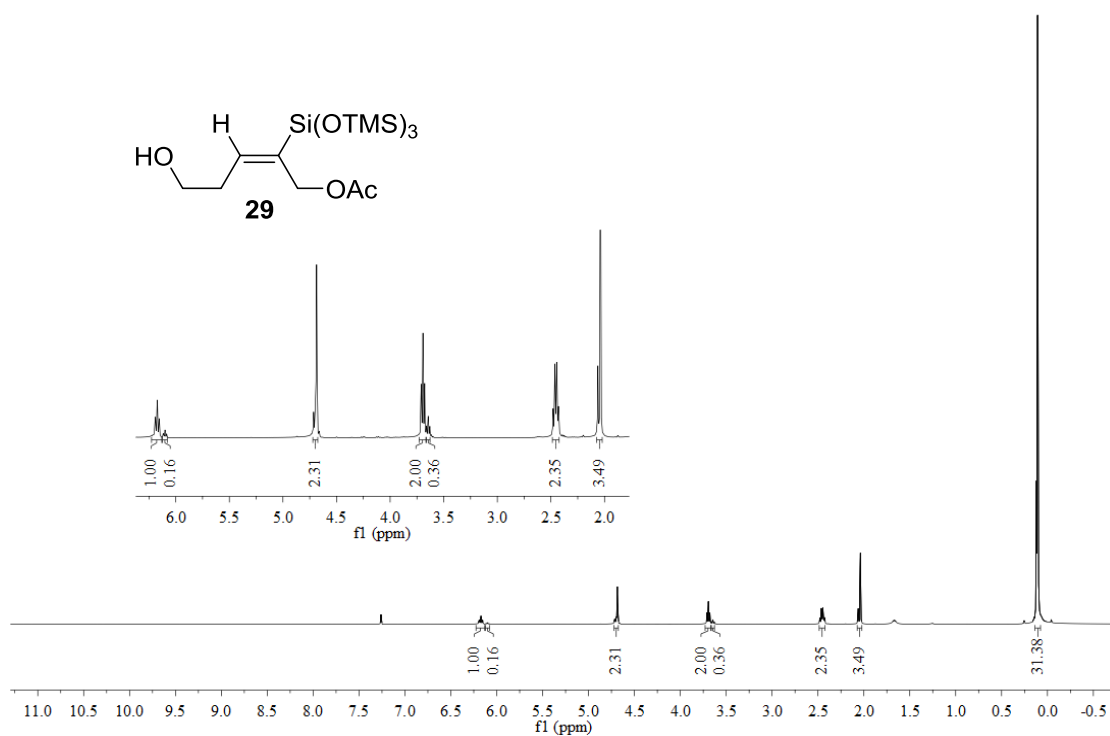

**Figure S29.** <sup>1</sup>H NMR spectra of **29**. (86:14  $\alpha/\beta$ )

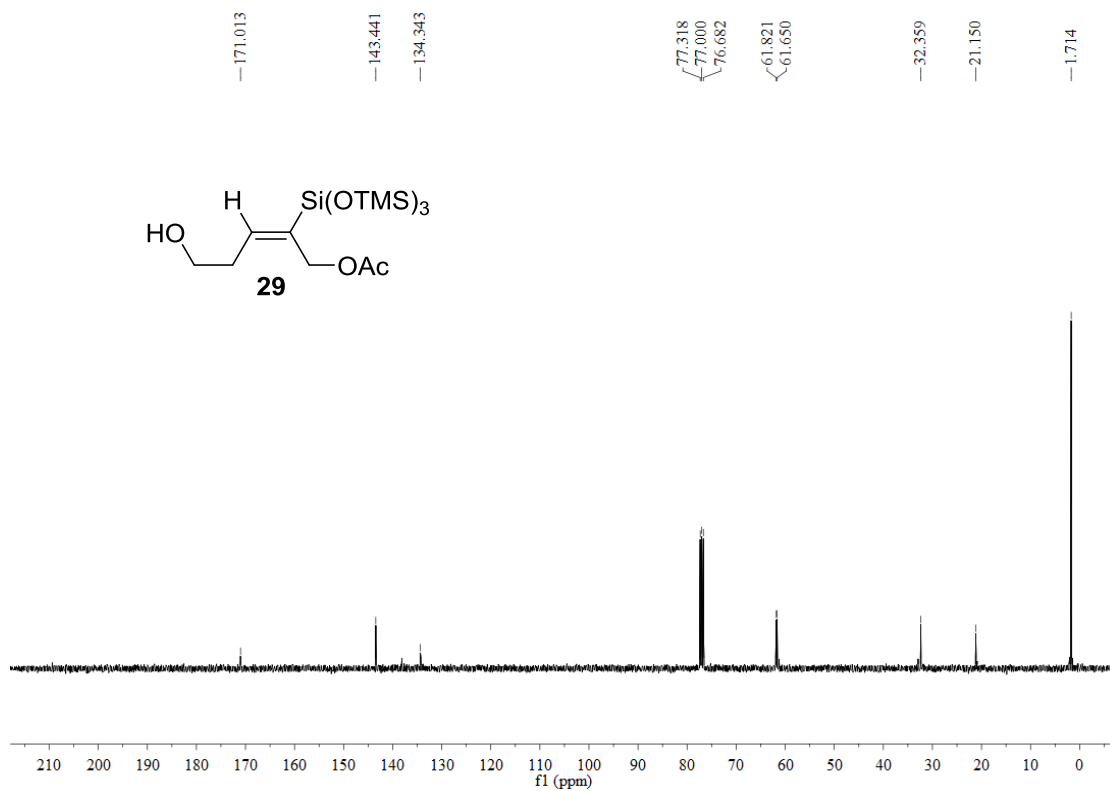

**Figure S30.** <sup>13</sup>C NMR spectra of **29**.



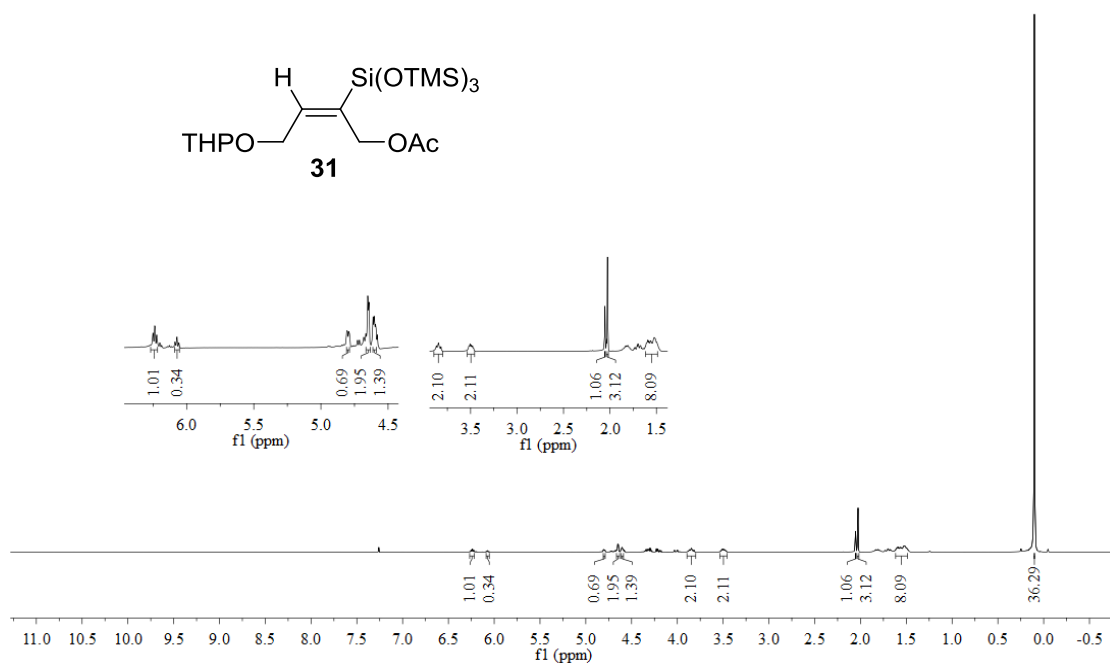

**Figure S33.**  $^1\text{H}$  NMR spectra of **31**. (75:25  $\alpha/\beta$ )

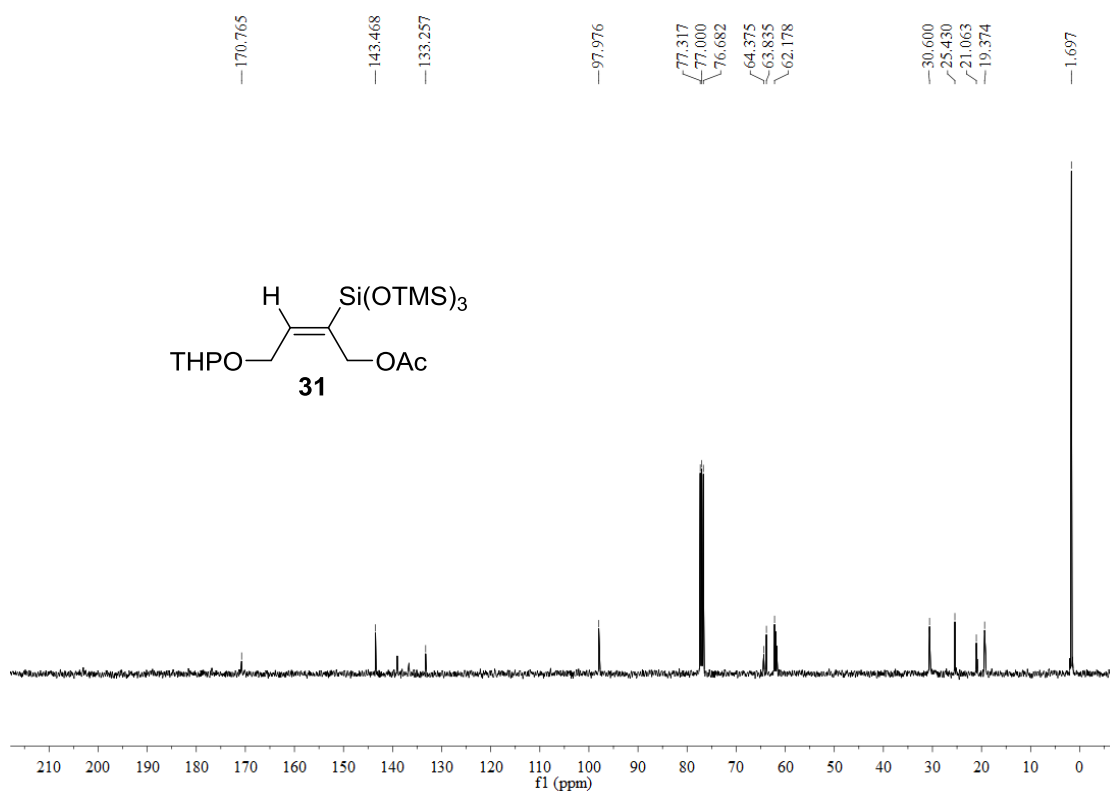

**Figure S34.**  $^{13}\text{C}$  NMR spectra of **31**.



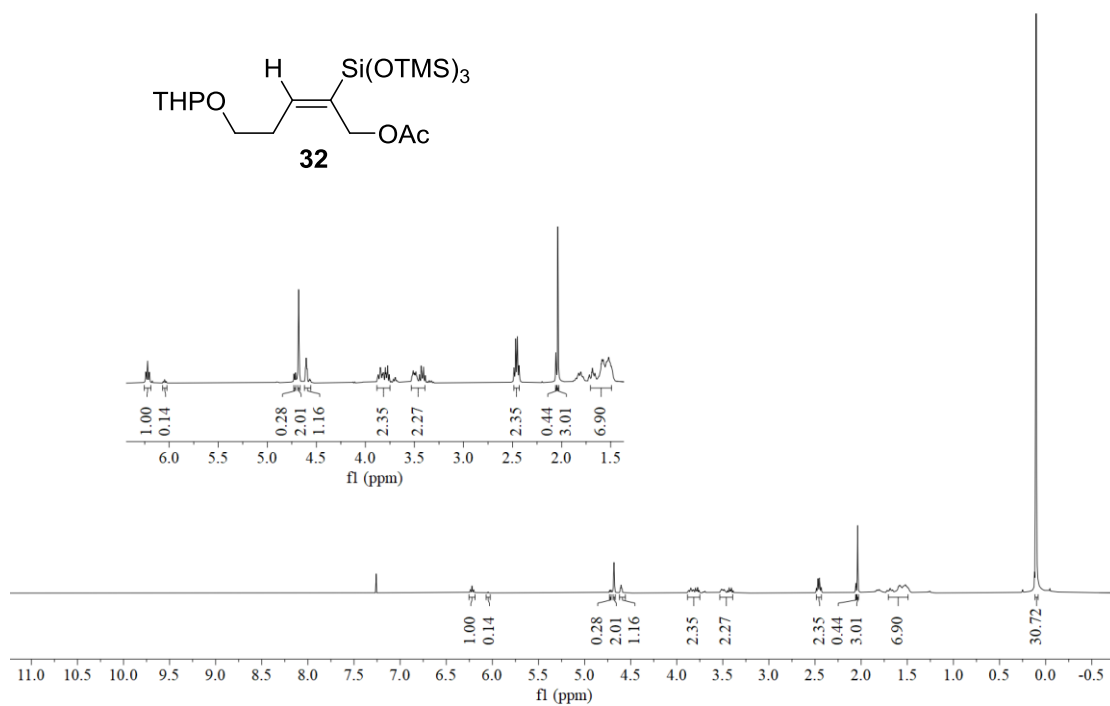

**Figure S35.** <sup>1</sup>H NMR spectra of **32**. (88:12  $\alpha/\beta$ )

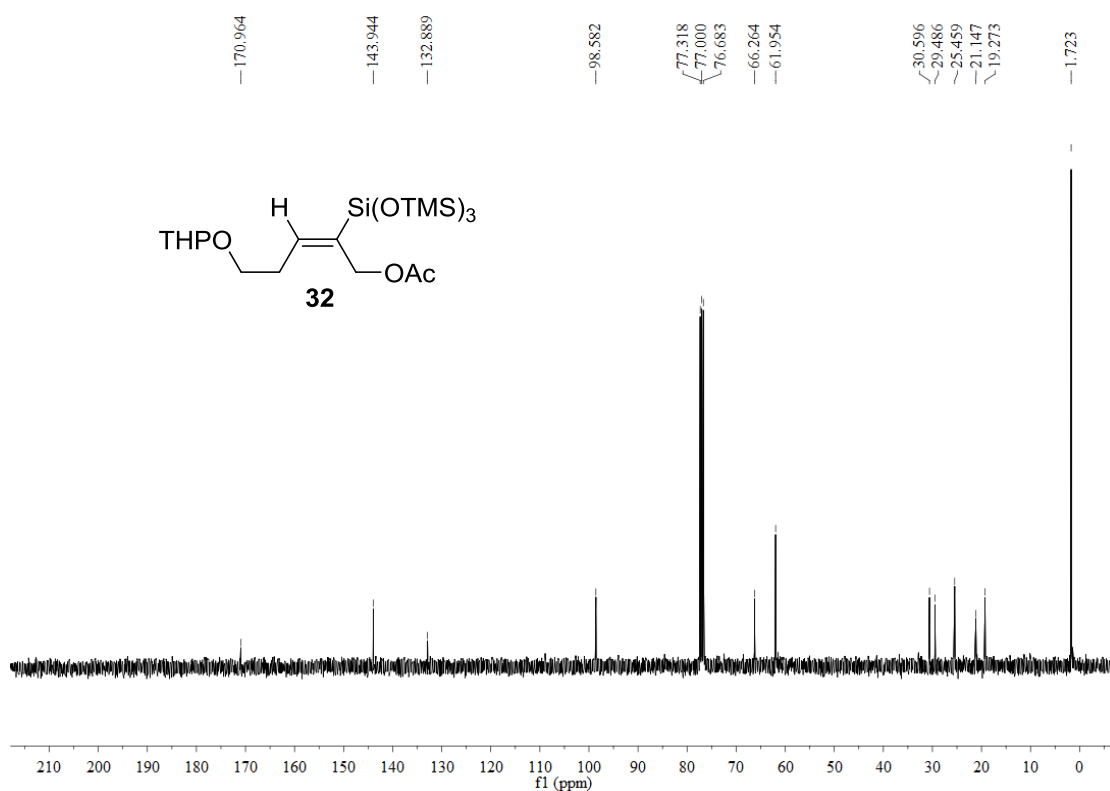

**Figure S36.** <sup>13</sup>C NMR spectra of **32**.

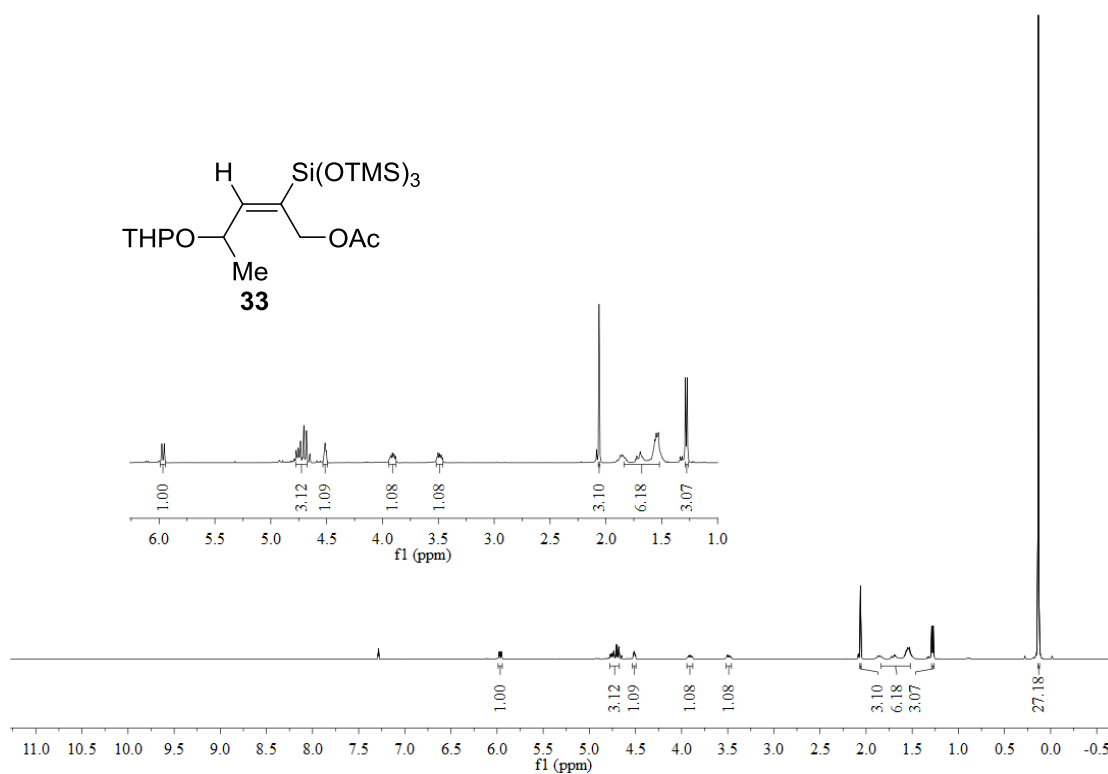

**Figure S37.** <sup>1</sup>H NMR spectra of **33**. (100:0 α/β)

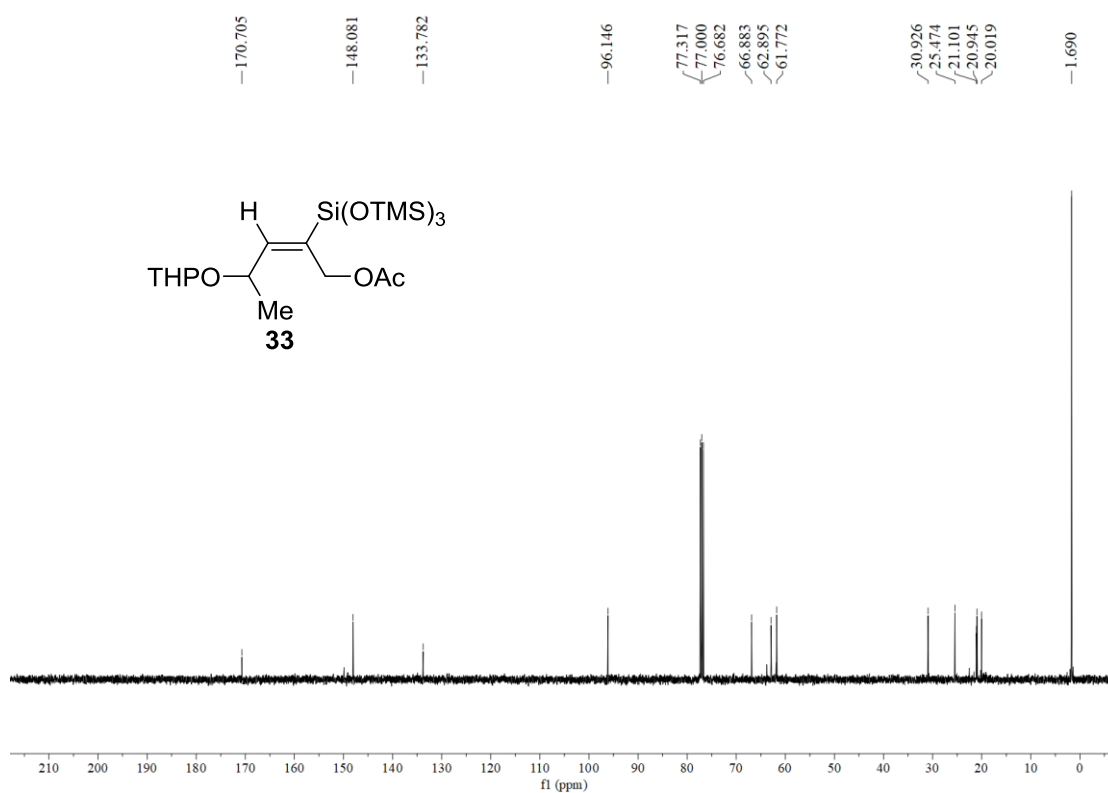

**Figure S38.** <sup>13</sup>C NMR spectra of **33**.

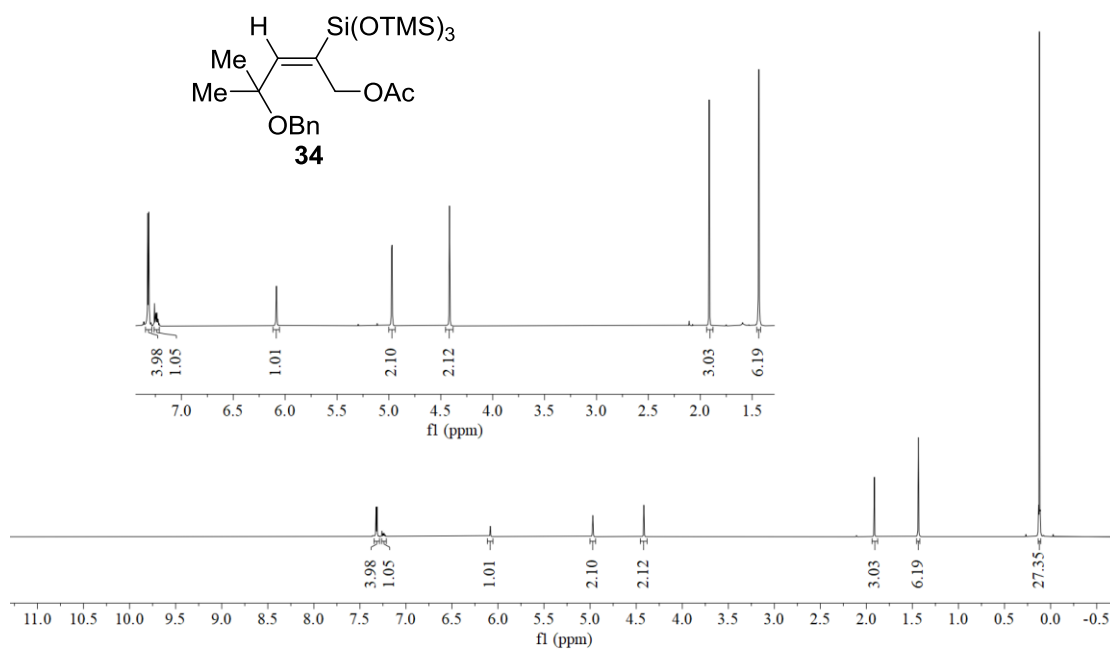

**Figure S39.**  $^1\text{H}$  NMR spectra of **34**. (100:0  $\alpha/\beta$ )

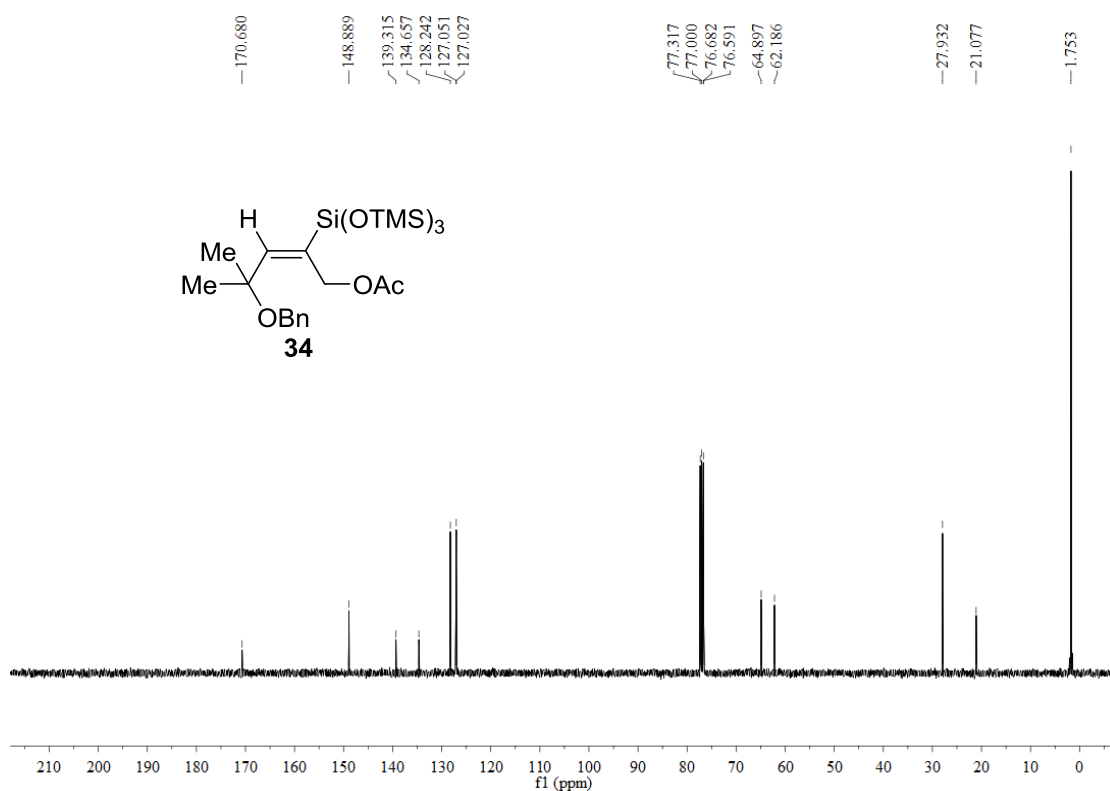

**Figure S40.**  $^{13}\text{C}$  NMR spectra of **34**.

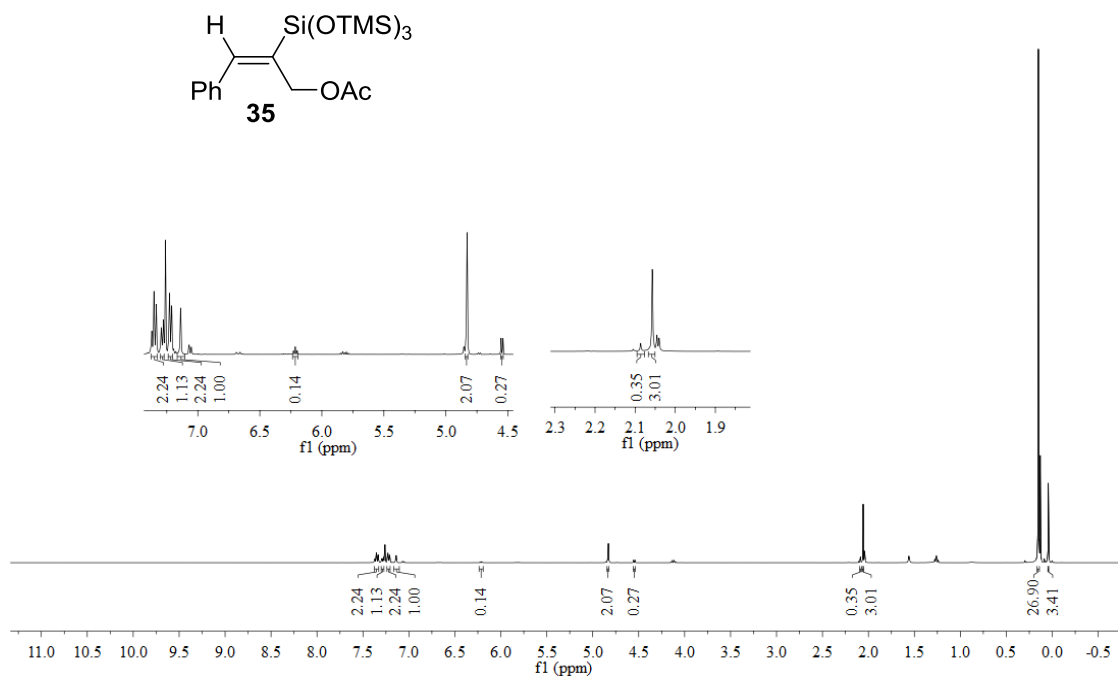

**Figure S41.** <sup>1</sup>H NMR spectra of **35**. (89:11  $\alpha/\beta$ )

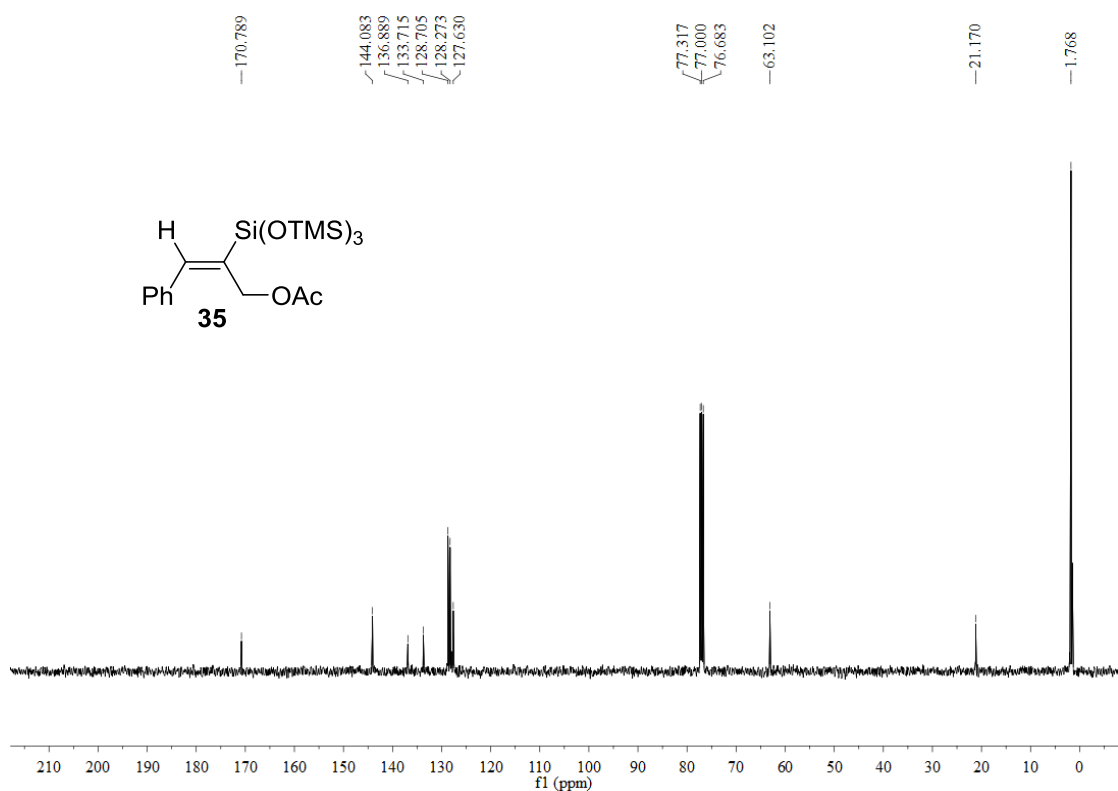

**Figure S42.** <sup>13</sup>C NMR spectra of **35**.

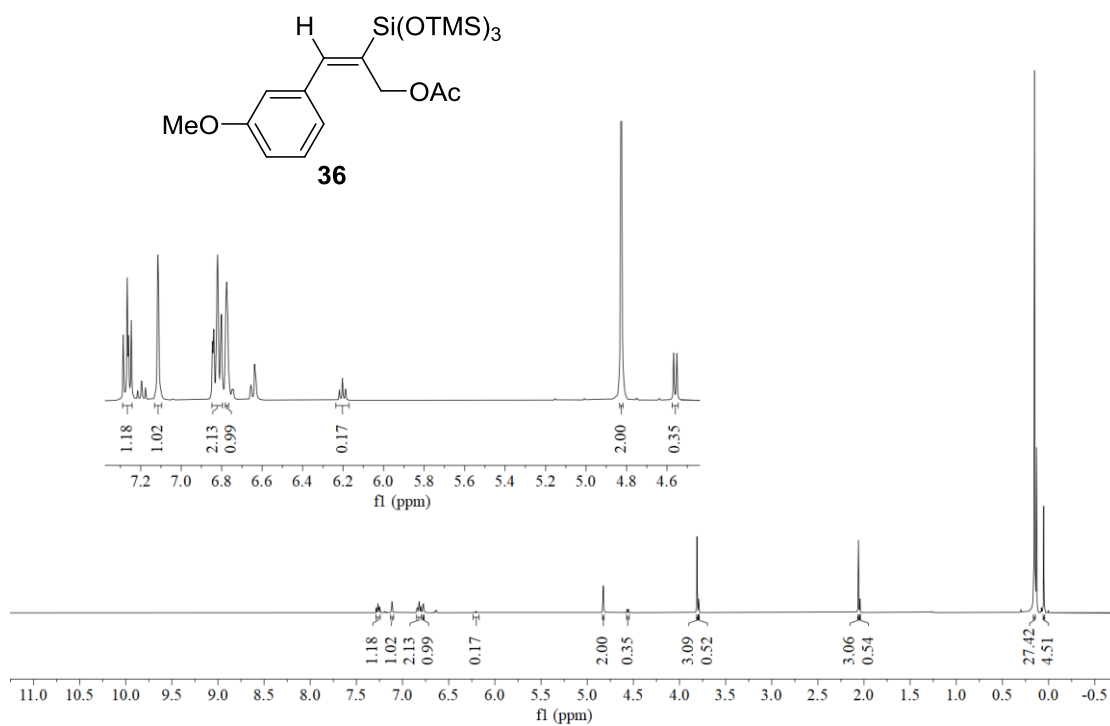

**Figure S43.** <sup>1</sup>H NMR spectra of **36**. (86:14  $\alpha/\beta$ )

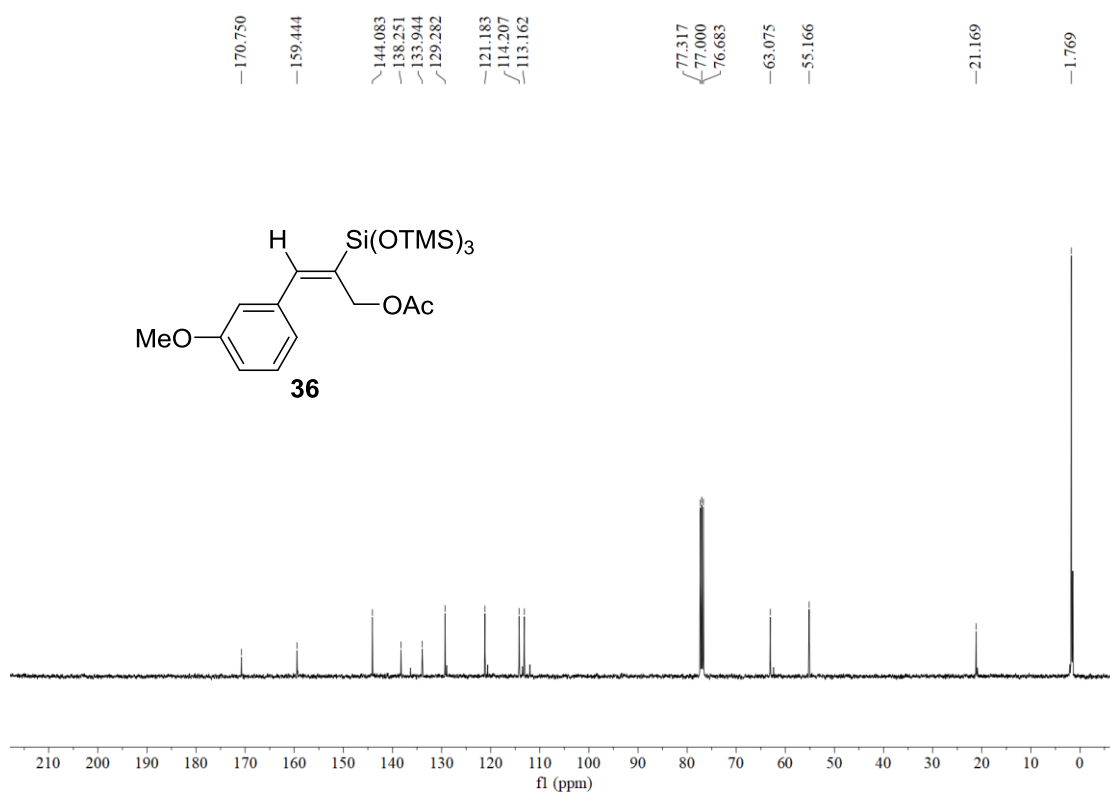

**Figure S44.** <sup>13</sup>C NMR spectra of **36**.

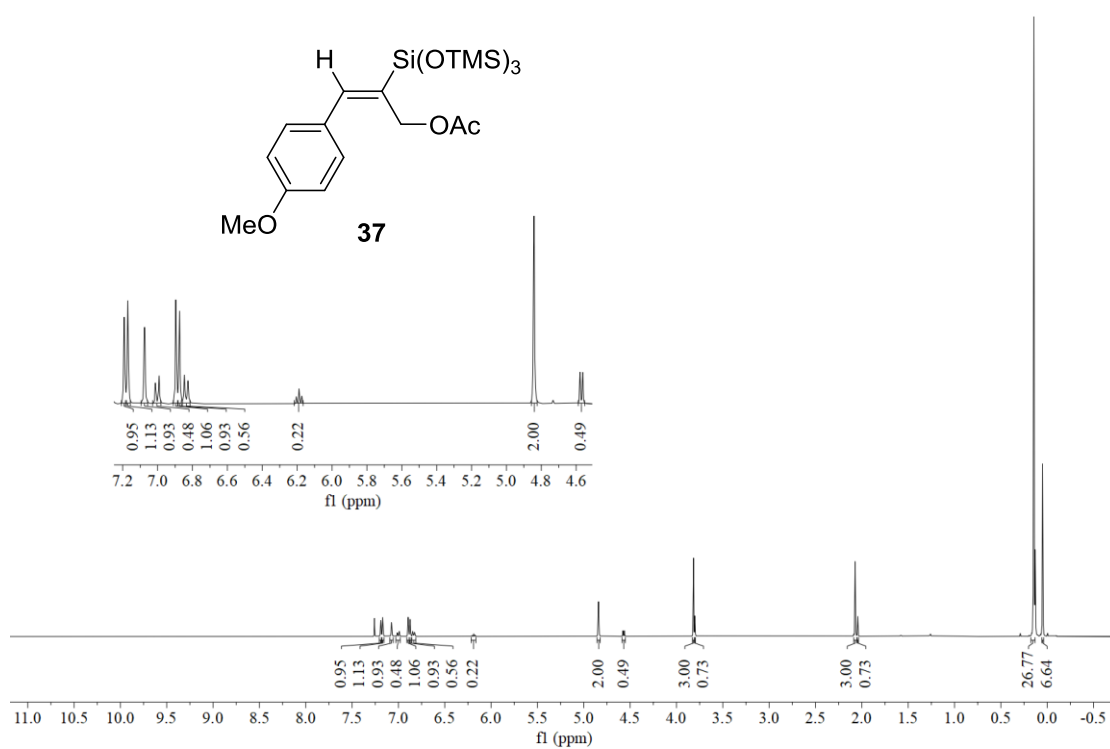

**Figure S45.** <sup>1</sup>H NMR spectra of **37**. (81:19  $\alpha/\beta$ )

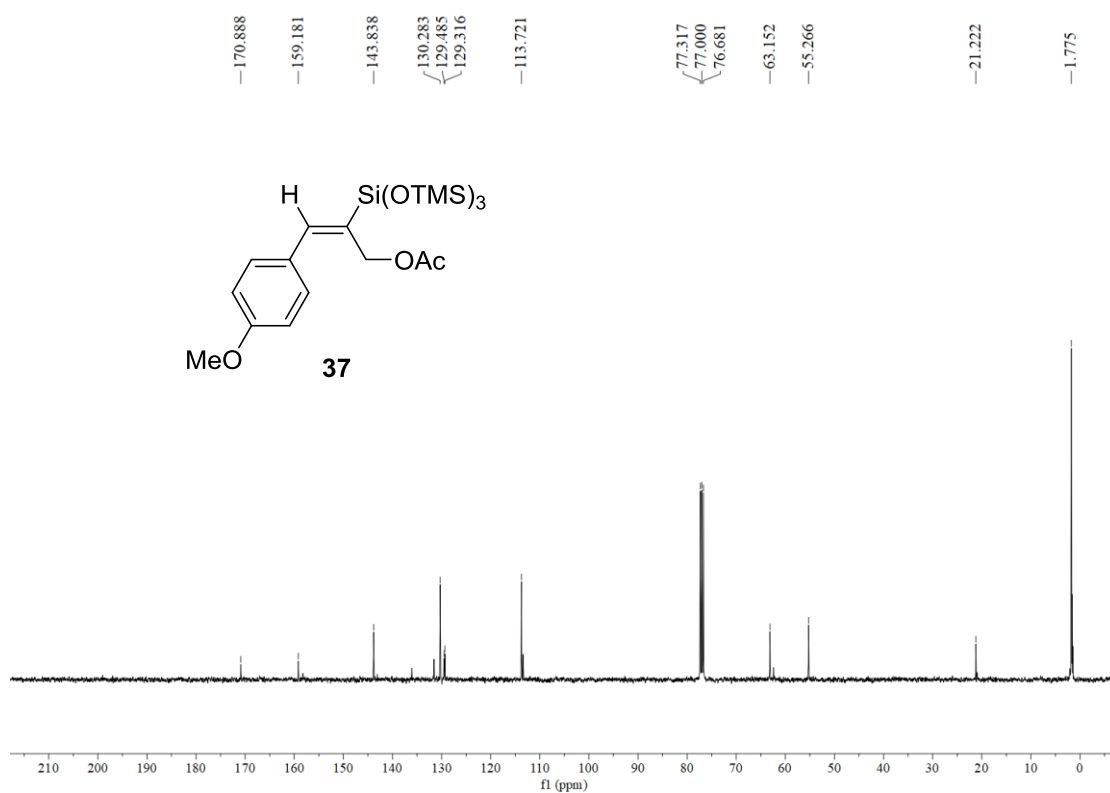

**Figure S46.** <sup>13</sup>C NMR spectra of **37**.

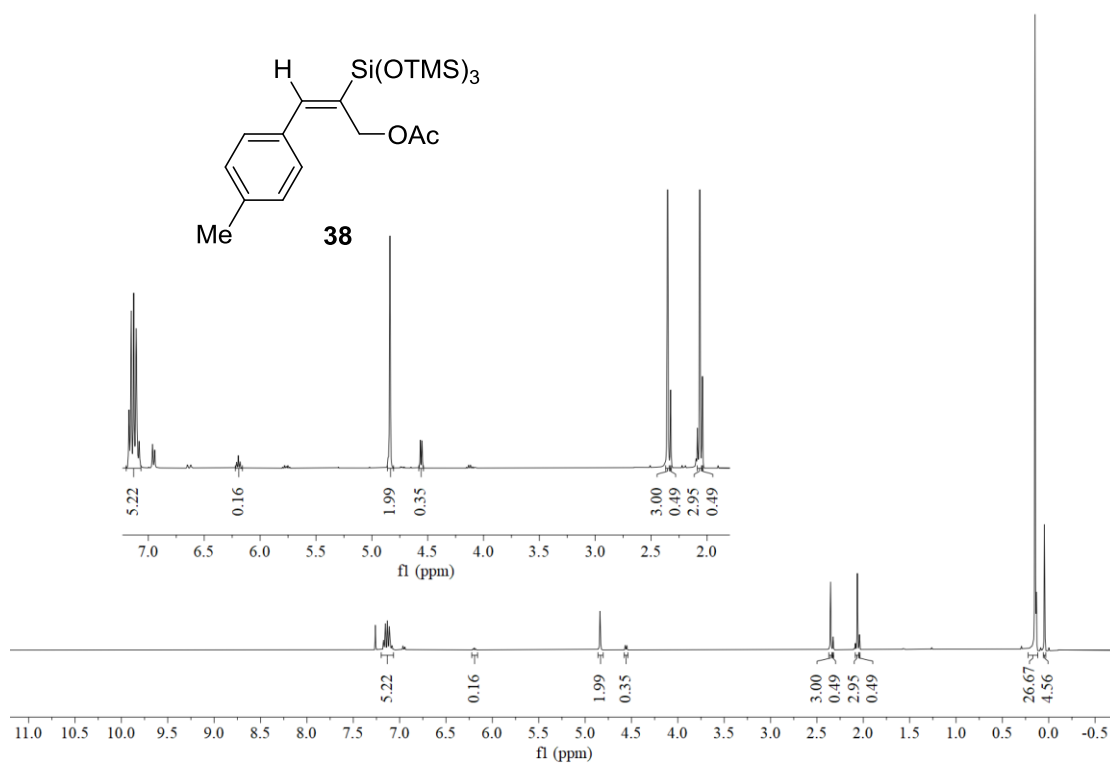

**Figure S47.** <sup>1</sup>H NMR spectra of **38**. (86:14  $\alpha/\beta$ )

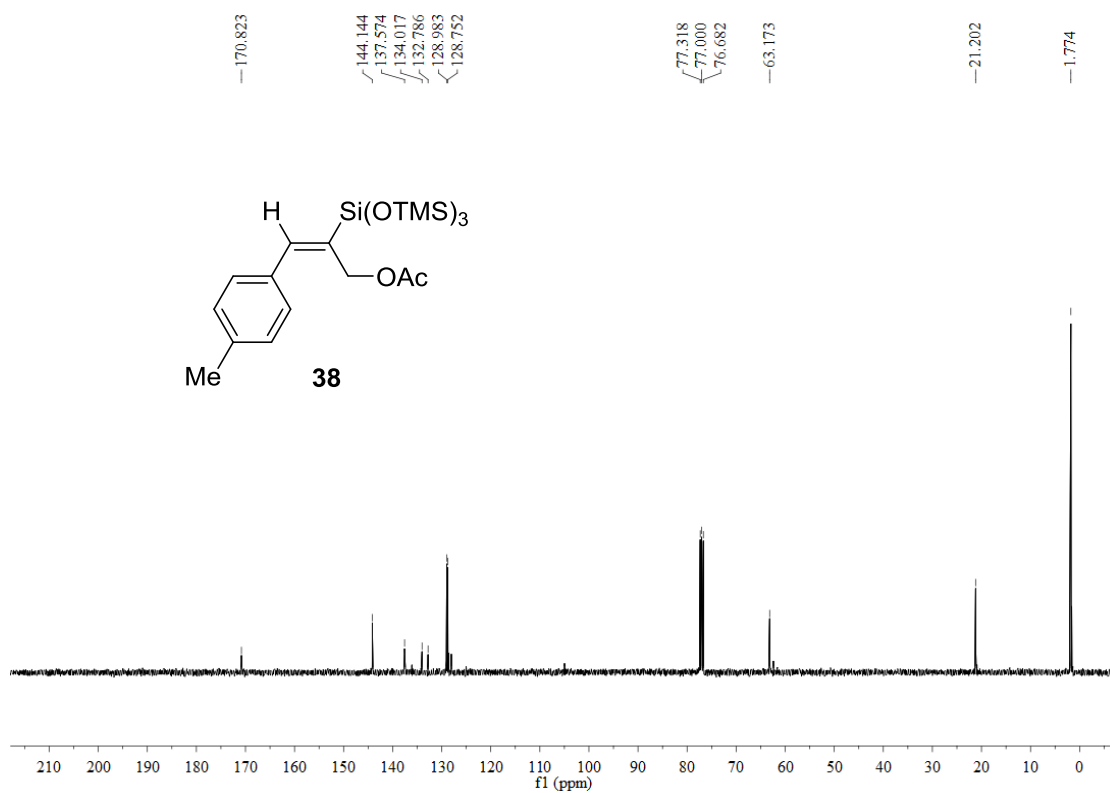

**Figure S48.** <sup>13</sup>C NMR spectra of **38**.

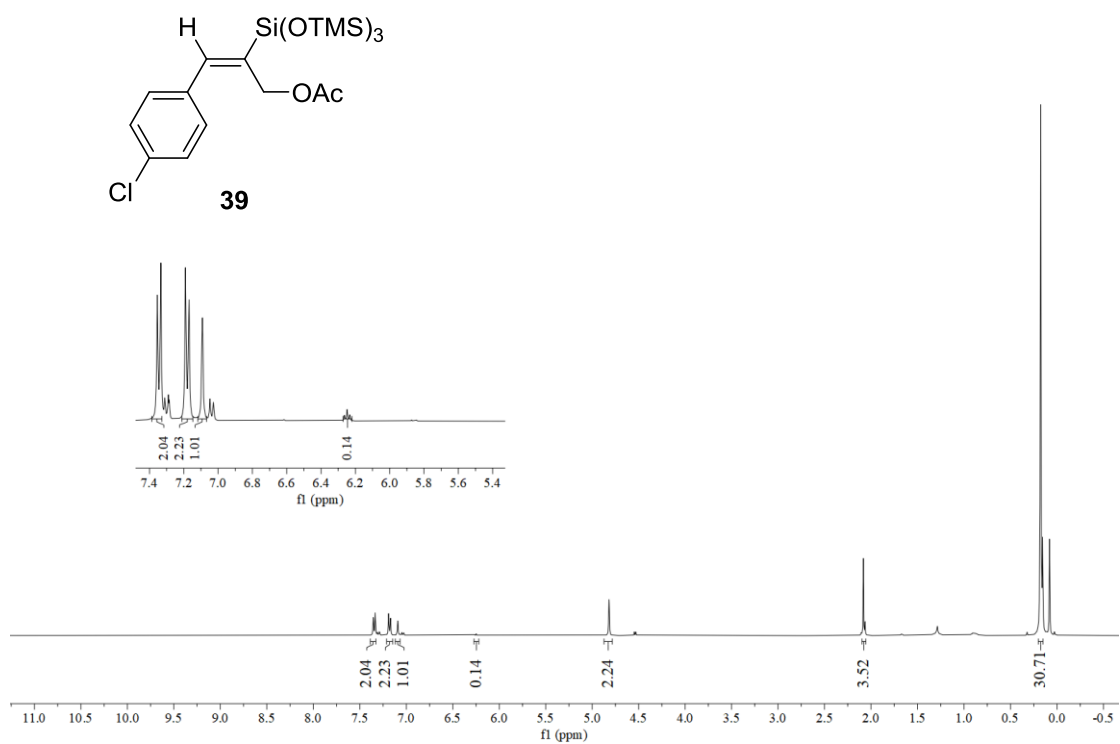

**Figure S49.** <sup>1</sup>H NMR spectra of **39**. (88:12  $\alpha/\beta$ )

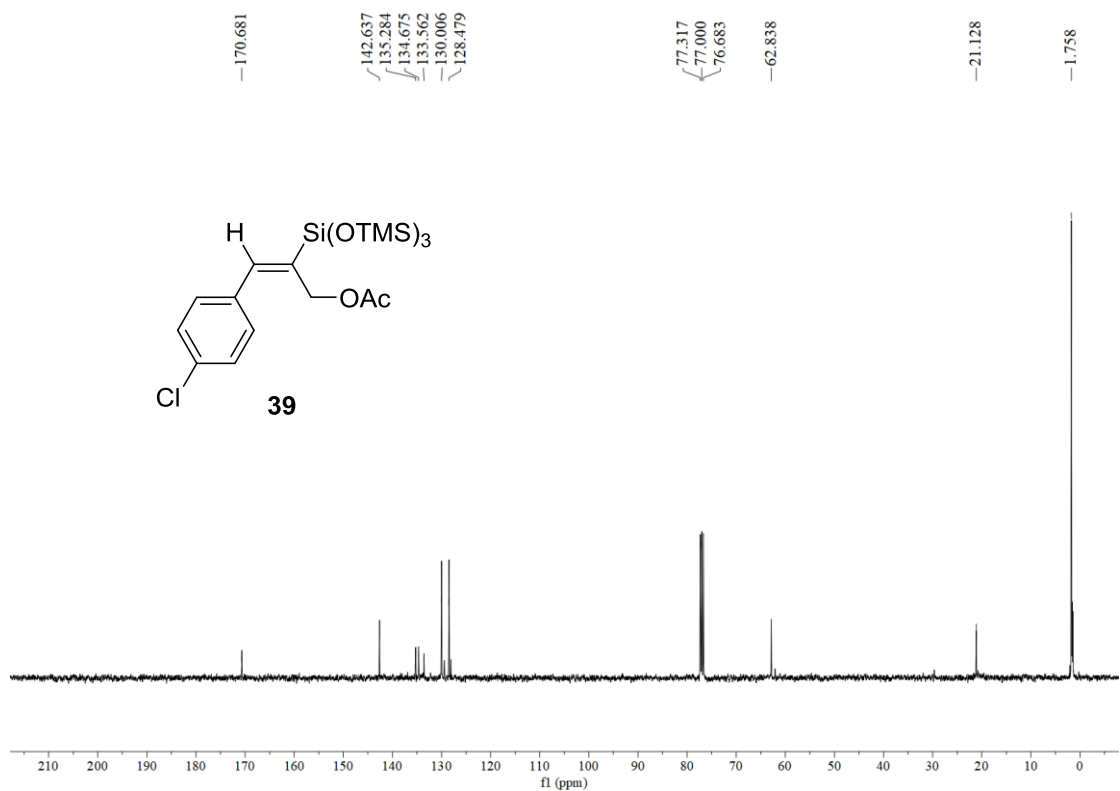

**Figure S50.** <sup>13</sup>C NMR spectra of **39**.



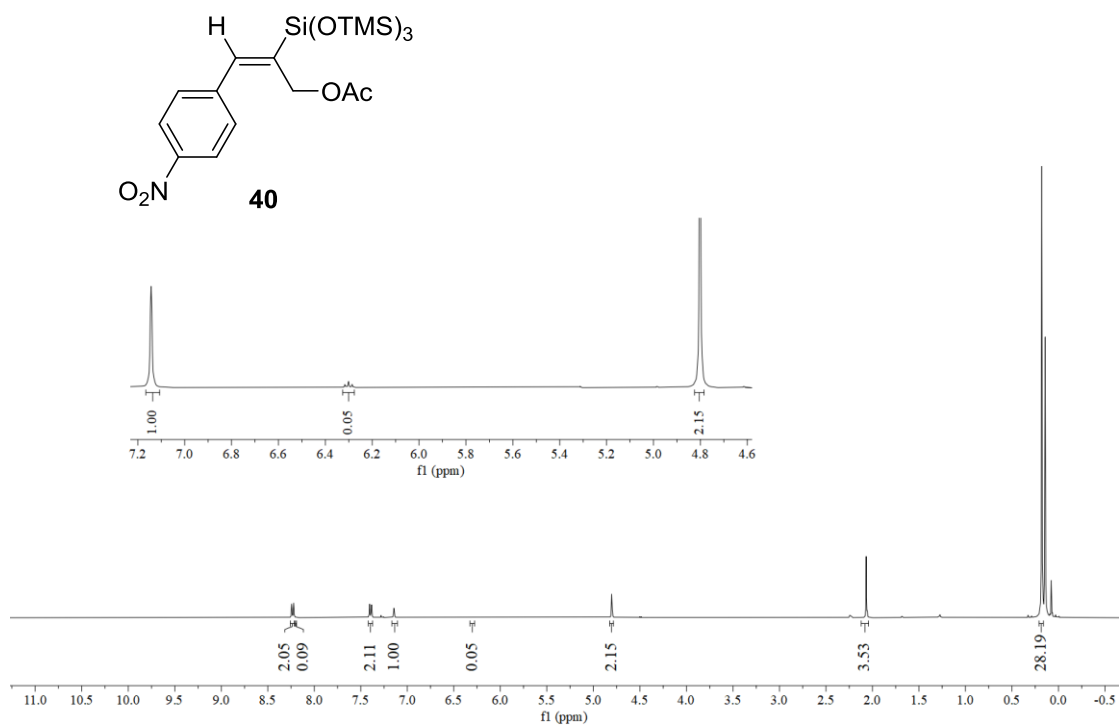

**Figure S51.** <sup>1</sup>H NMR spectra of **40**. (95:5  $\alpha/\beta$ )

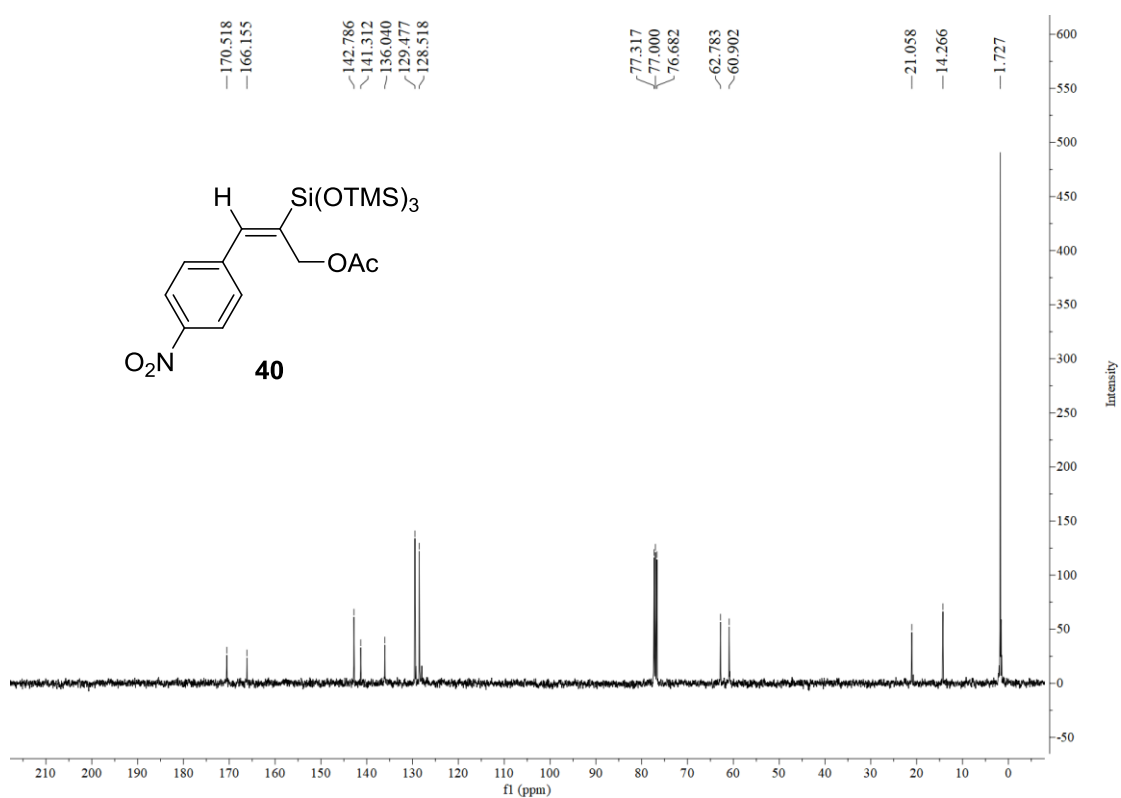

**Figure S52.** <sup>13</sup>C NMR spectra of **40**.

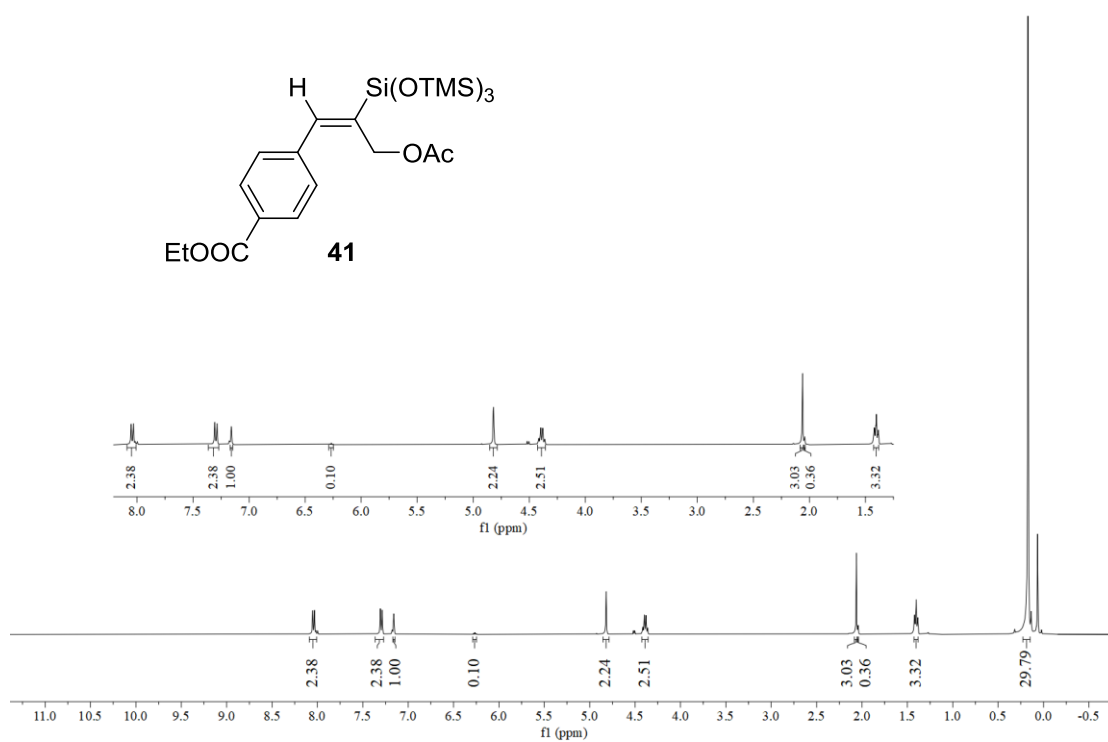

**Figure S53.** <sup>13</sup>C NMR spectra of **41**. (91:9  $\alpha/\beta$ )

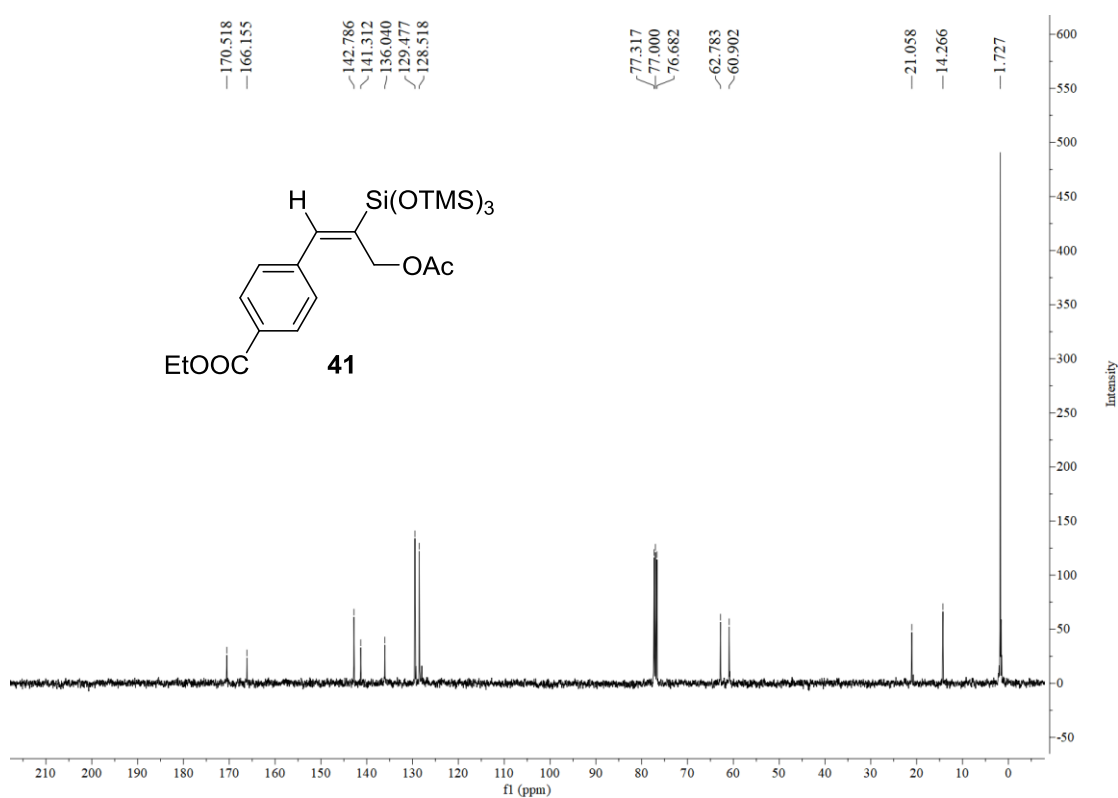

**Figure S54.** <sup>13</sup>C NMR spectra of **41**.

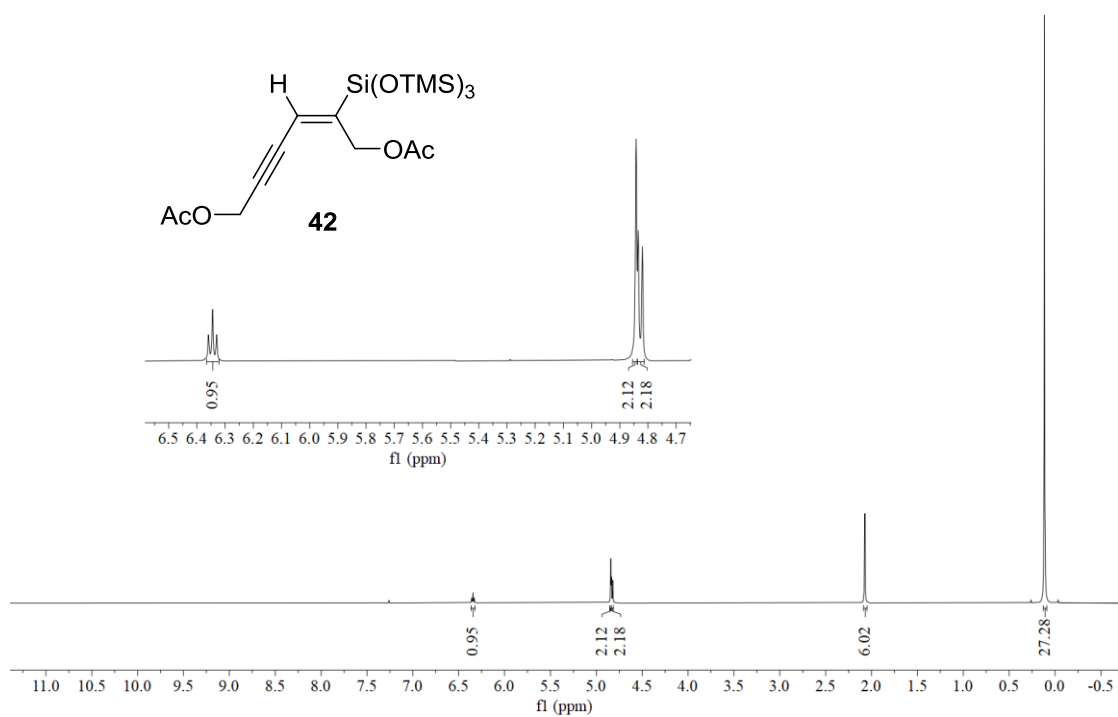

**Figure S55.** <sup>1</sup>H NMR spectra of **42**. (100:0  $\alpha/\beta$ )

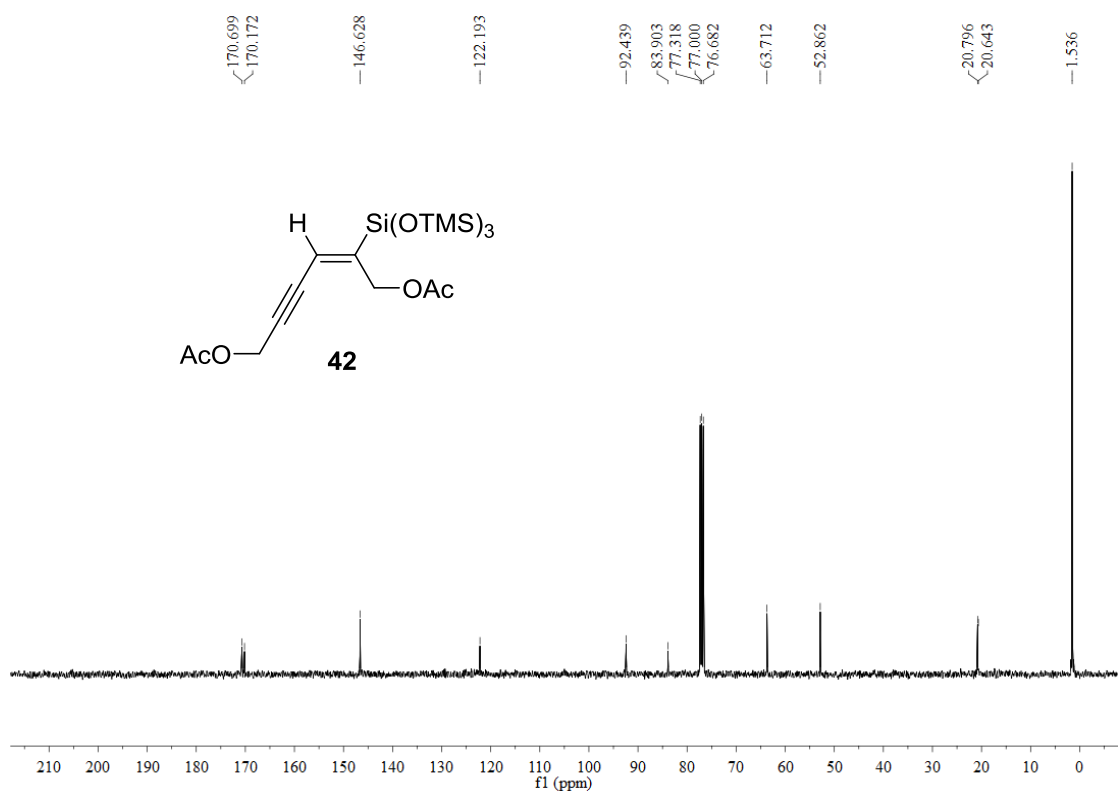

**Figure S56.** <sup>13</sup>C NMR spectra of **42**.

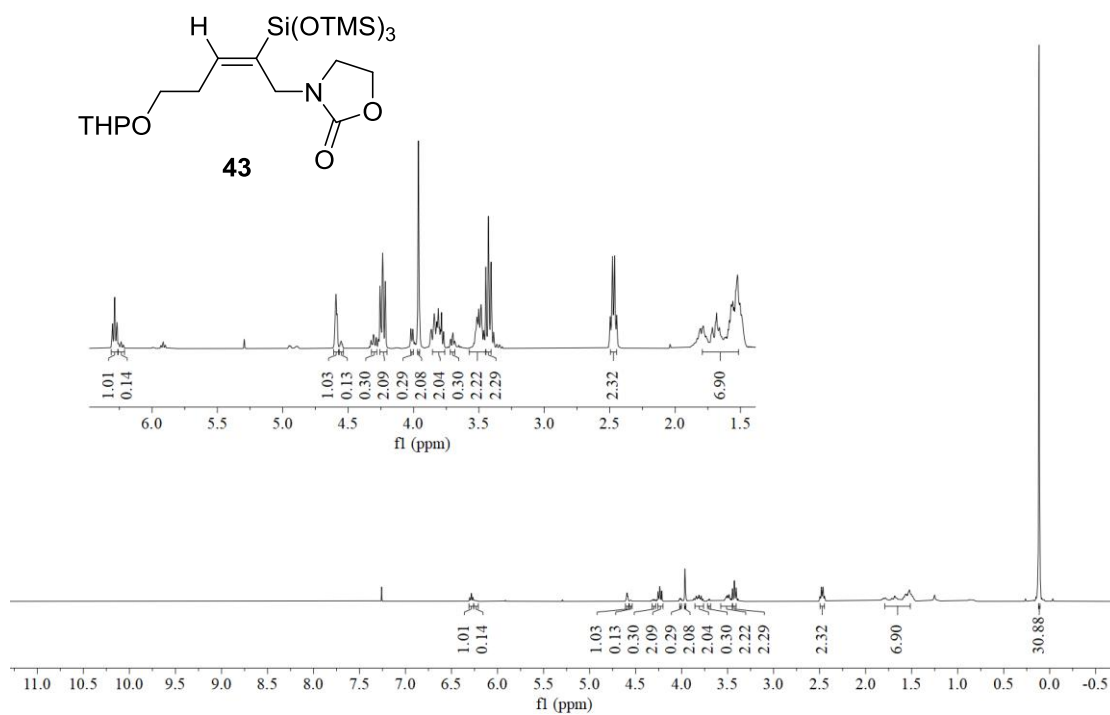

**Figure S57.**  $^1\text{H}$  NMR spectra of **43**. (88:12  $\alpha/\beta$ )

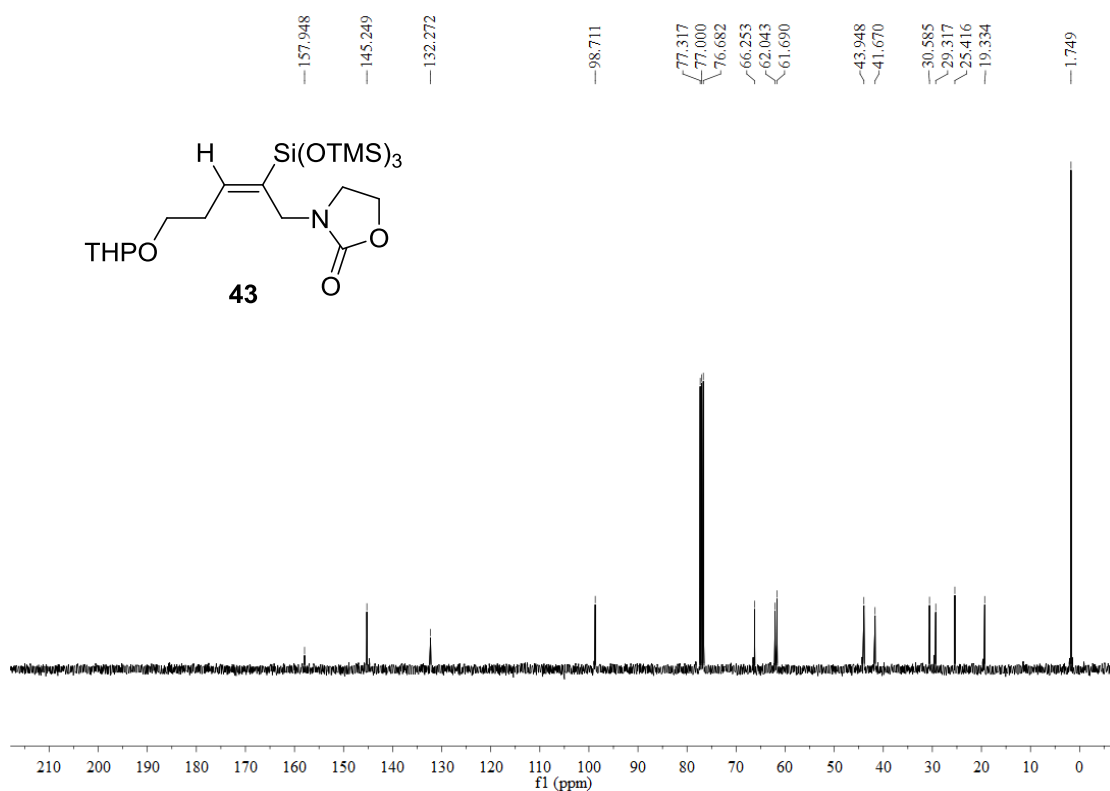

**Figure S58.**  $^{13}\text{C}$  NMR spectra of **43**.

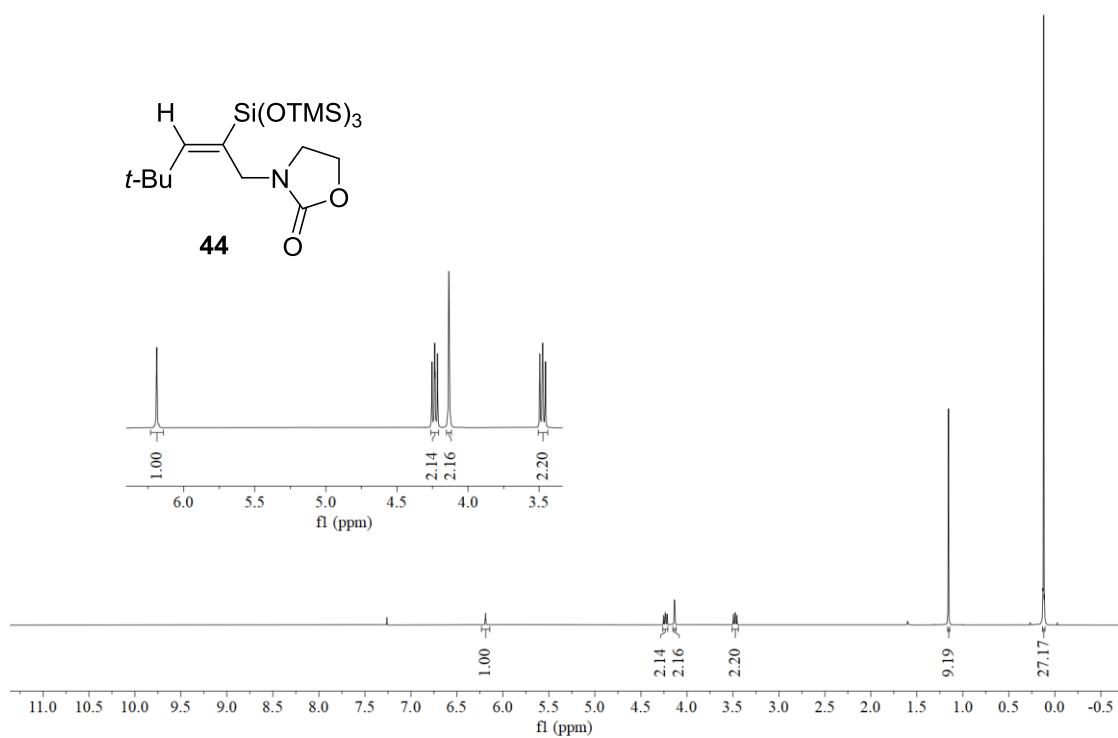

**Figure S59.** <sup>1</sup>H NMR spectra of **44**. (100:0  $\alpha/\beta$ )

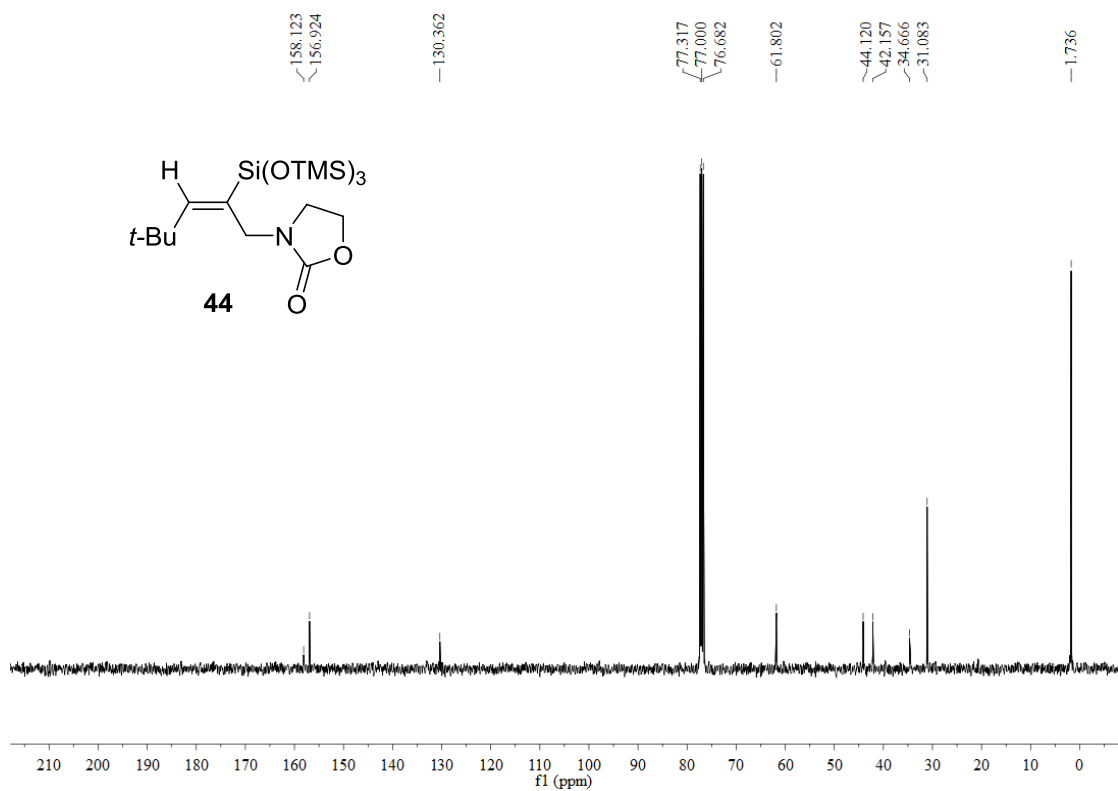

**Figure S60.** <sup>13</sup>C NMR spectra of **44**.

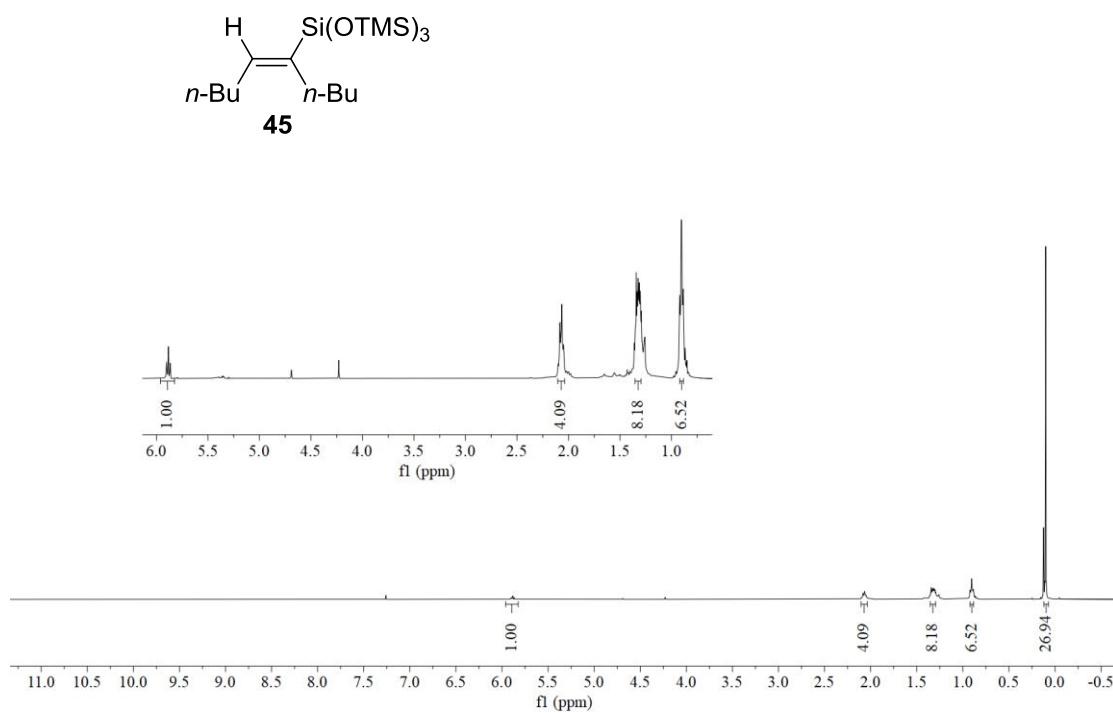

**Figure S61.** <sup>1</sup>H NMR spectra of **45**.

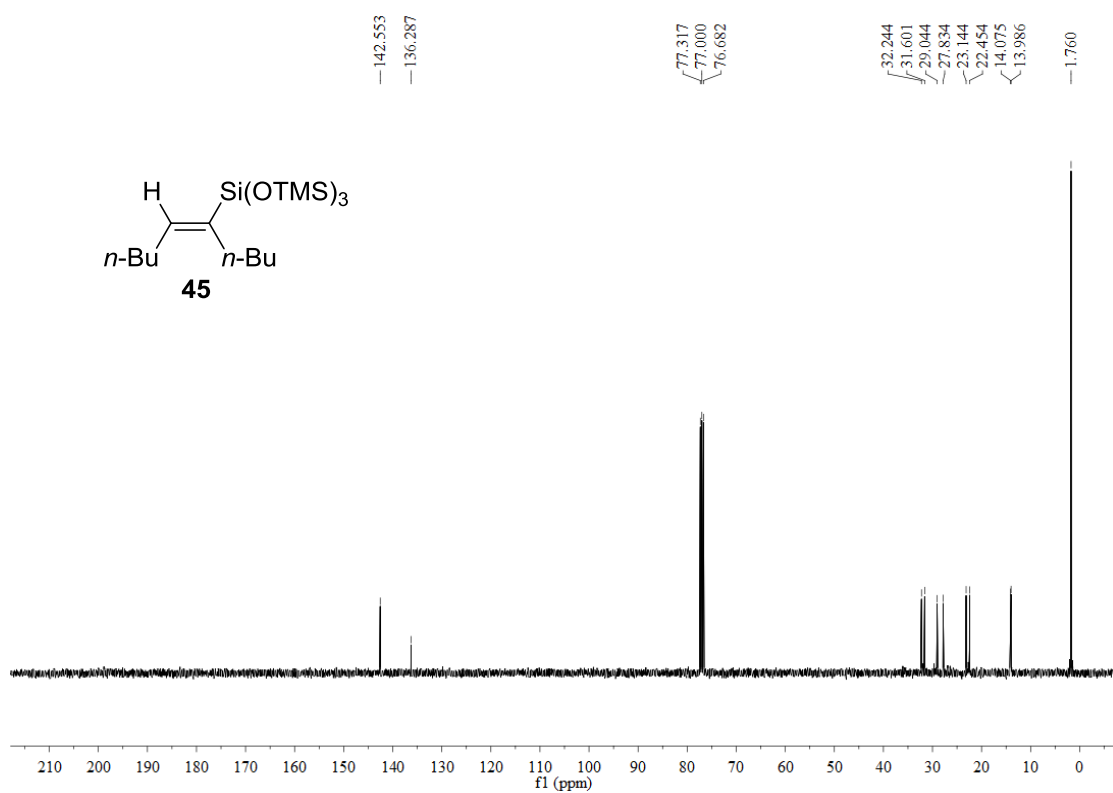

**Figure S62.** <sup>13</sup>C NMR spectra of **45**.

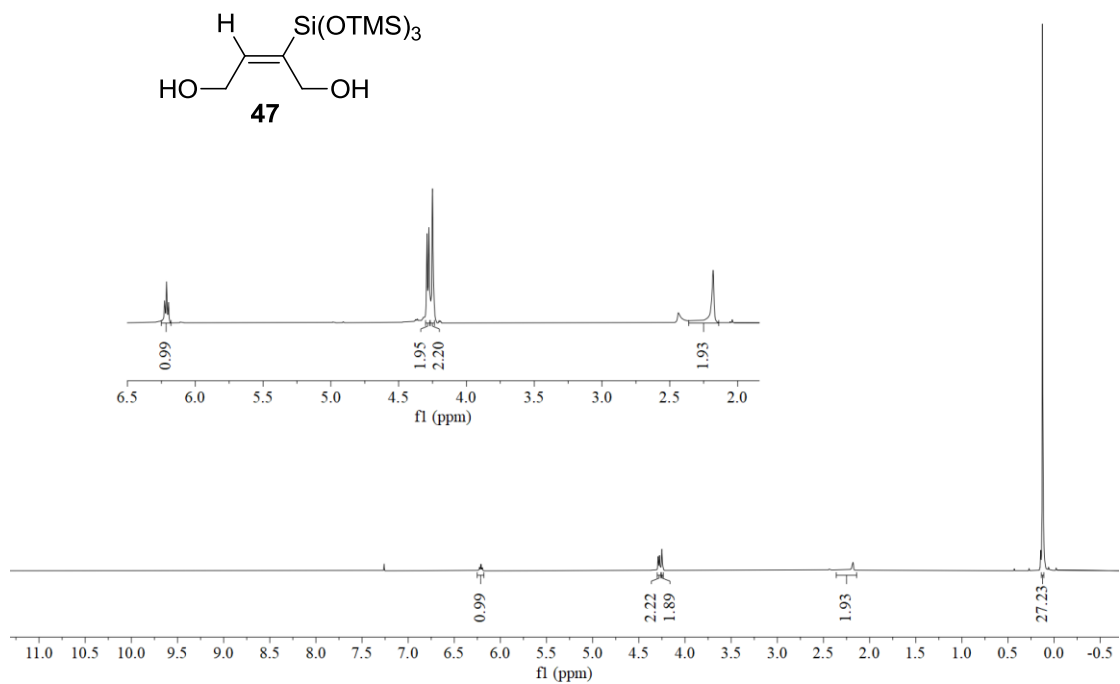

**Figure S63.** <sup>1</sup>H NMR spectra of **47**.

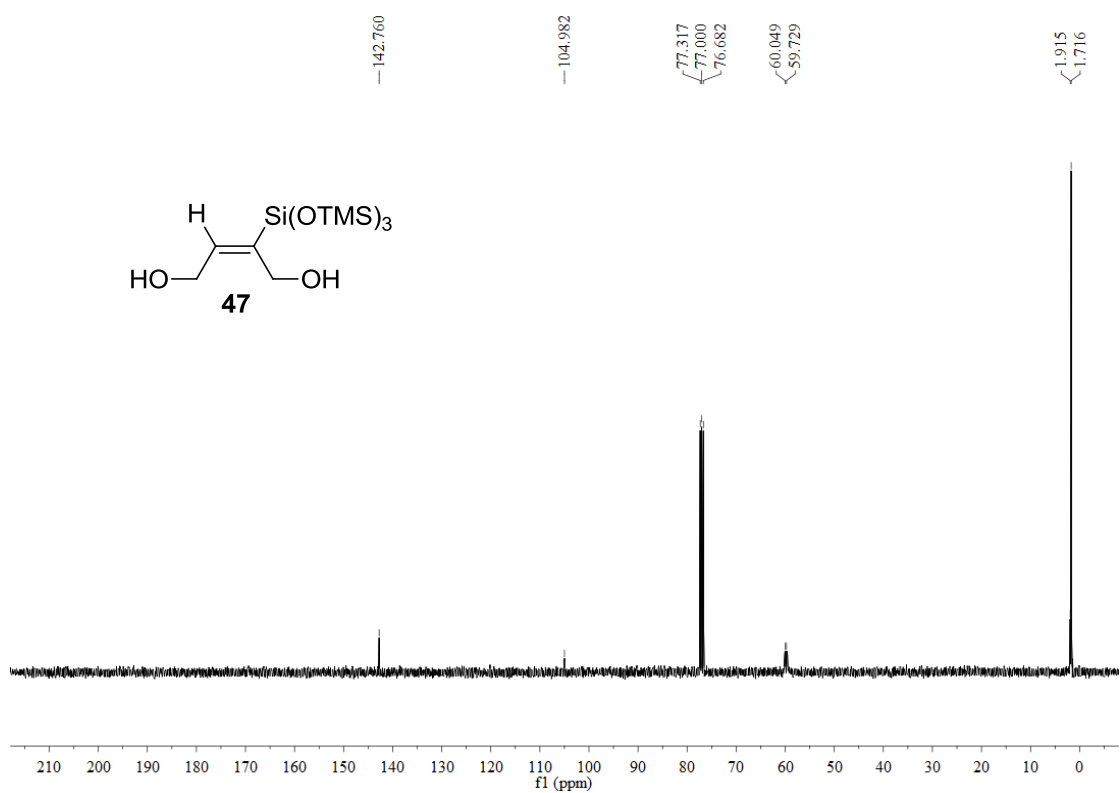

**Figure S64.** <sup>13</sup>C NMR spectra of **47**.

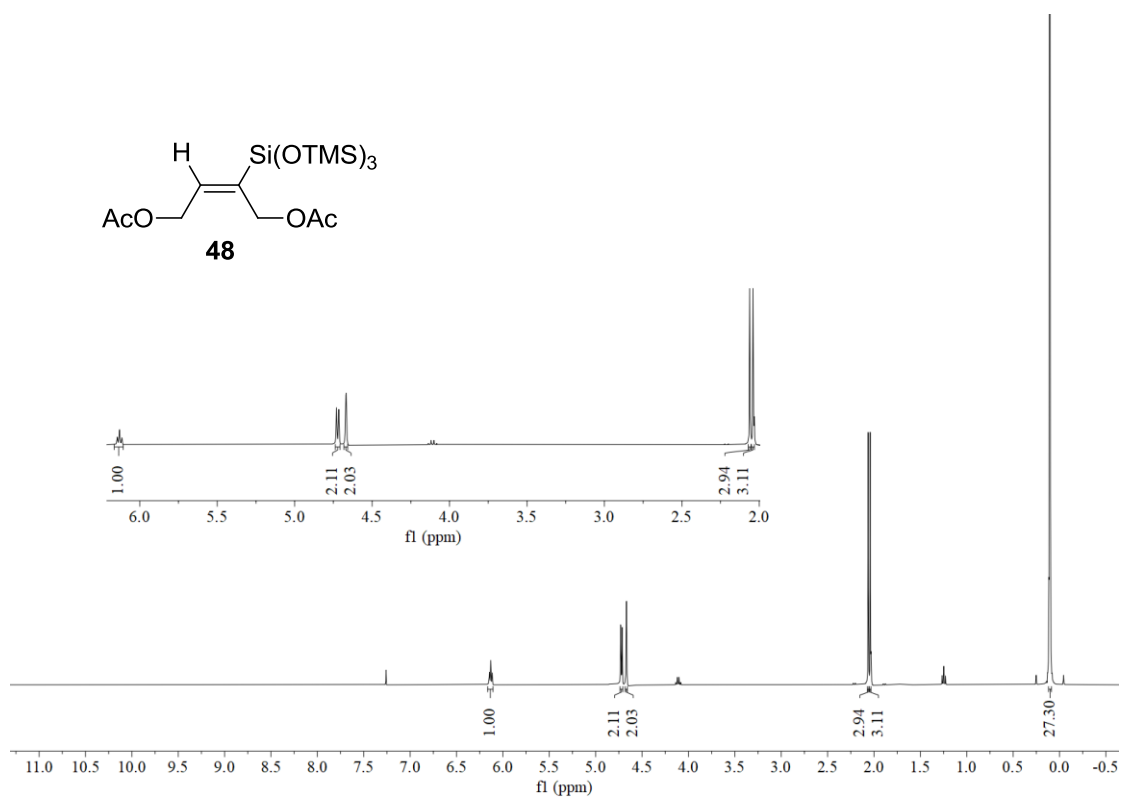

**Figure S65.** <sup>1</sup>H NMR spectra of **48**.

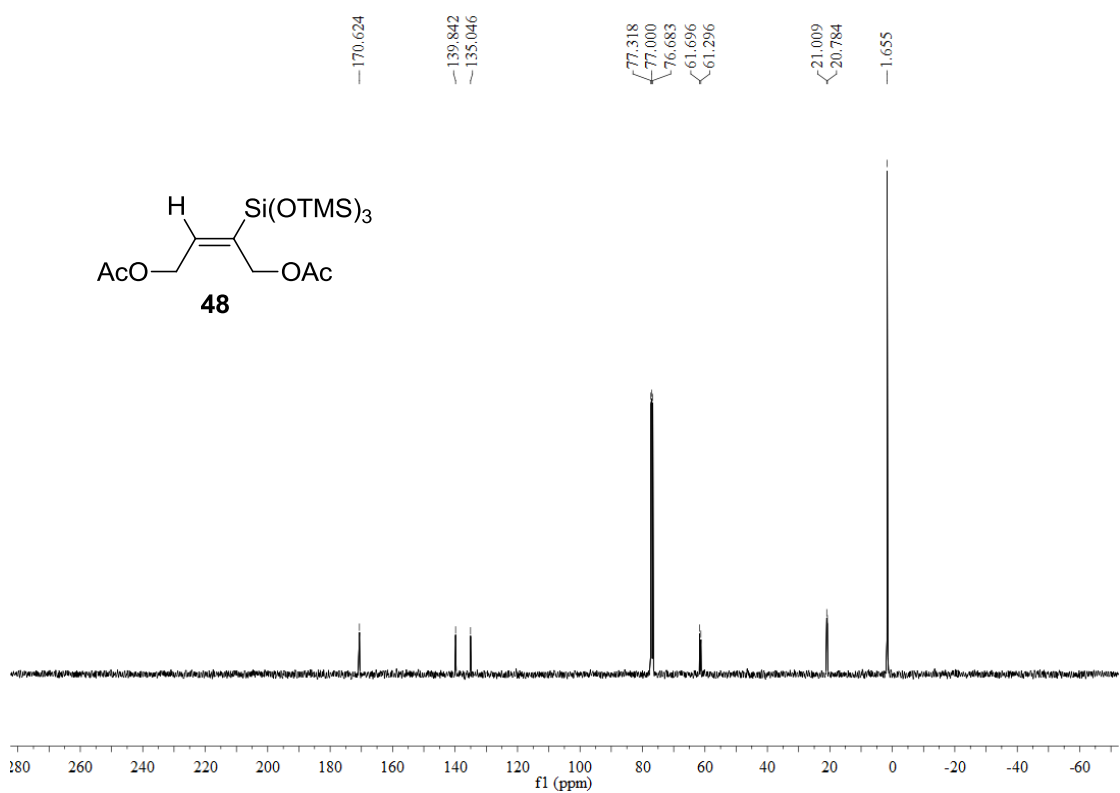

**Figure S66.** <sup>13</sup>C NMR spectra of **48**.





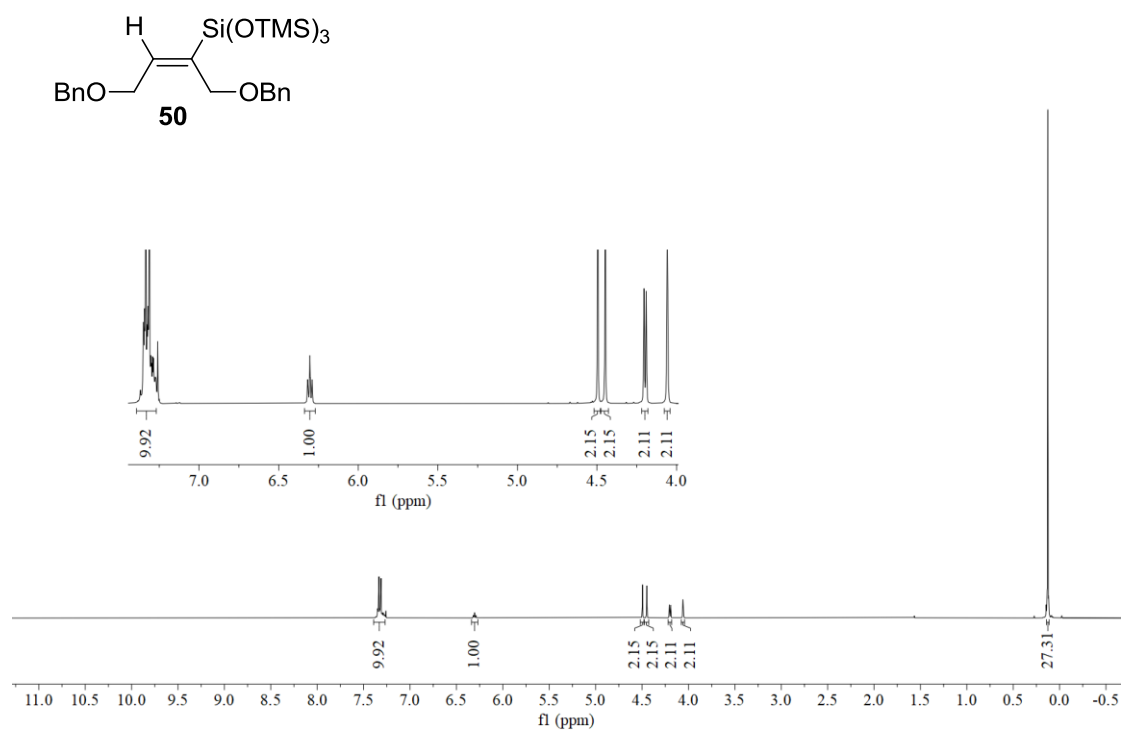

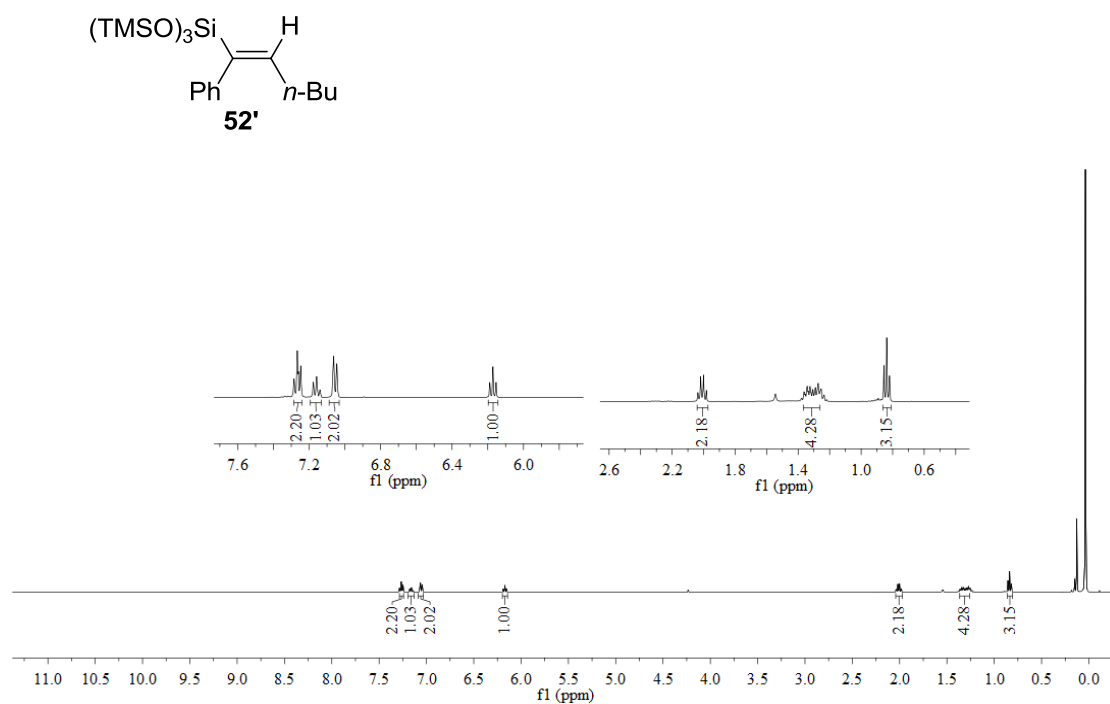

**Figure S71.** <sup>1</sup>H NMR spectra of **52'**.

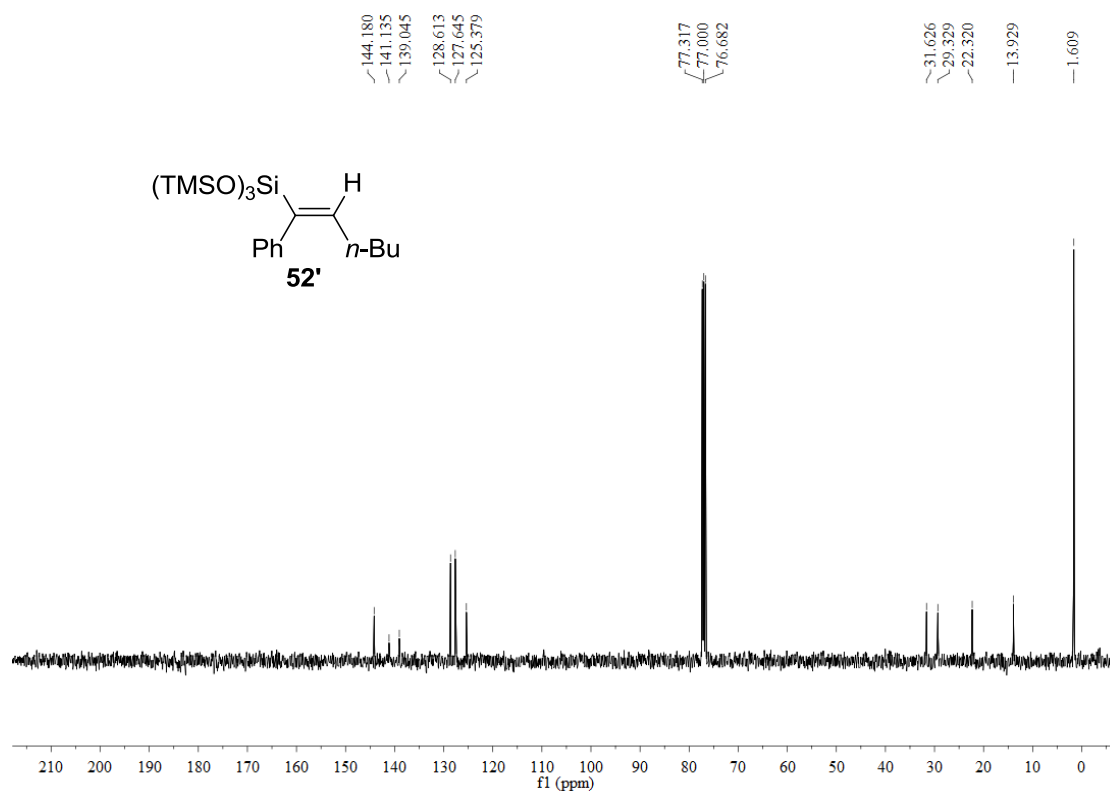

**Figure S72.** <sup>13</sup>C NMR spectra of **52'**.
